# Supplementary material for: Prediction and Characterization of Missing Proteomic Data inDesulfovibrio vulgaris
Source: Hindawi journal article supplement (doi:10.1155/2011/780973), 2011-01-01
Supplement: f1 [file 780973.f1.xls]

## Sheet: Suppl Table 1
Supplementary Table 1. Relative variable importance measures for the ten top ranked variables (after removing genes with high mRNA values) (From Torres-García et al., Bioinformatics, 2009, 25:1905–1914).
Dataset 1						Dataset 2
FL		LL		LS		CT0		CT120		ST120
Variables	Relative Importance	Variables	Relative Importance	Variables	Relative Importance	Variables	Relative Importance	Variables	Relative Importance	Variables	Relative Importance
mRNAmean	24.55	mRNAmean	29.22	mRNAmean	51.8	mRNAmean	50.23	mRNAmean	20.78	mRNAmean	23.17
Cellular_role_I	12.46	Cellular_role_I	17.05	GCT	13.51	AAG	9.98	AAG	13.27	AAG	17.17
AAG	8.03	AAG	9.41	Cellular_role_I	8.94	GGT	7.93	Cellular_role_I	12.18	GGT	10.22
ACC	7.47	GGC	5.49	AAG	6.3	Cellular_role_I	5.2	GGT	6.76	Cellular_role_I	7
GCT	7.45	GTT	4.51	GTT	3.42	GTT	3.77	GTT	4.93	ACC	5.5
GGT	3.88	ACC	3.6	GGT	2.66	GCT	2.39	GGG	4.76	GCT	4.04
GGC	3.09	ATG	3.28	GAA	1.89	GGG	2.09	GAA	4.28	GGG	2.9
GTT	3.07	ATC	2.46	ACC	1.5	GAA	1.84	GCT	3.83	AAC	2.69
ATC	2.61	GCT	2.21	GTC	1.43	AAC	1.19	TTC	3.46	ATC	2.23
ATG	2.35	GAC	1.93	TCC	1.12	ATC	1.16	ACC	3.37	GTC	2.12

## Sheet: Suppl Table 2
Gene_id	PredictionLL	RNA-LL	Protein-LL	PredictionLS	RNA-LS	Protein-LS	PredictionFL	RNA-FL	Protein-FL	PredictionCT0	RNA-CT0	Protein-CT0	PredictionCT120	RNA-CT120	Protein-CT120	PredictionST120	RNA-ST120	Protein-ST120	DESCRIPTION	EC_No	Cellular_role_I	Cellular_role_II
DVU3025	36.119	1001.1	21.6667	10.135	514	17.3333	28.137	778.75	25	1936.1	27553	1819.5	794.01	19596	1554	938.18	6965.6	1614.5	pyruvate-ferredoxin oxidoreductase (poR)	1.-.-.-	Energy metabolism	Electron transport
DVU0847	97.385	10433	178.667	263.42	2242.6	181.333	118.33	6358.6	182	787.81	37319	1681.5	887.57	34003	1068	1907.7	36370	1193.5	adenylyl-sulphate reductase, alpha subunit (aprA)	1.8.99.2	Central intermediary metabolism	Sulfur metabolism
DVU0811	44.187	2168.9	63.3333	45.854	1469.1	47.3333	29.775	925.67	60	760.4	23010	376	405.79	8613.2	588	161.64	4781.9	288.5	dnaK protein (dnaK)		Protein fate	Protein folding and stabilization
DVU1300	13.307	1739.6	25.6667	33.744	908.3	19	28.842	688.33	29.6667	591.14	9408.4	535	237.18	6797.1	446	500.93	11472	442	translation elongation factor G (fusA-1)		Protein synthesis	Translation factors
DVU1012	9.8856	2462.3	13	1.4766	1315.5	1.33333				583.41	11986	312	357.05	11649	258.5	261.26	6424.6	248	hemolysin-type calcium-binding repeat protein		Cellular processes	Toxin production and resistance
DVU0402	65.847	20951	125.333	120.83	5663.8	76	56.613	18107	146.333	428.19	34073	652.5	530.11	33167	838.5	383.15	24306	507.5	dissimilatory sulfite reductase alpha subunit (dsvA)	1.8.99.3	Central intermediary metabolism	Sulfur metabolism
DVU3150	25.753	3268	22.3333	50.162	2016.6	13.3333	24.631	1682.4	36.3333	419.62	10806	445.5	262.02	11249	450	511.82	17702	436	ribosomal protein S1 (rpsA)		Protein synthesis	Ribosomal proteins: synthesis and modification
DVU0169	53.893	2234.9	37	24.918	770	35.6667	49.06	3277.2	48.3333	340.87	25675	410	388.38	13669	296.5	114.01	5459.7	69	oligopeptide/dipeptide ABC transporter, periplasmicsoligopeptide/dipeptide-binding protein		Transport and binding proteins	Amino acids, peptides and amines
DVU0849	28.709	2648.2	22	6.6281	413.8	11.6667	42.736	1701.7	34.3333	334.5	6177.6	360	242.02	3437.1	271.5	195.22	6243.9	323	heterodisulfide reductase, iron-sulfur-binding subunit, putatives		Energy metabolism	Electron transport
DVU0777	39.238	2535	20	8.397	369.95	8	17.757	735.68	17.3333	237.41	24828	370	276.72	8037.5	325	326.4	21167	430	ATP synthase, F1 alpha subunit (atpA)	3.6.3.14	Energy metabolism	ATP-proton motive force interconversion
DVU0873				3.2743	119.65	6				235.59	18583	96	171.13	11758	103	133.82	18619	19	translation elongation factor Ts (tsf)		Protein synthesis	Translation factors
DVU0503	11.535	896.62	8.66667	17.82	381.73	13	11.631	498.85	11	220	5956.7	225.5	329.36	7376.1	171	281.93	18386	418	polyribonucleotide nucleotidyltransferase (pnp)	2.7.7.8	Transcription	Degradation of RNA
DVU1636	25.961	1382.4	57	9.5087	446.37	71.6667	23.391	918.2	68.6667	214.35	15943	653.5	102.25	7297.4	640	114.47	15140	608	inorganic pyrophosphatase, manganese-dependent (ppaC)s	3.6.1.1	Central intermediary metabolism	Phosphorus compounds
DVU0547	15.282	847.72	21.3333	10.126	395.17	18.3333	11.801	714.2	14.6667	213.46	18384	74.5	133.15	7636.7	48.5	68.845	7837.5	21	high-affinity branched chain amino acid ABC transporter, periplasmicsbranched chain amino acid-binding protein		Transport and binding proteins	Amino acids, peptides and amines
DVU0508	2.2524	546.33	1.33333	38.6	363.15		17.16	265.75		200.85	2973.2	85	216.83	3225.5	92.5	152.08	6904.3	71	translation initiation factor IF-2 (infB)		Protein synthesis	Translation factors
DVU1334	8.4018	676.92	30.6667	7.3876	521.45	22	8.8232	578.82	32.3333	193.86	14744	158.5	173.73	12434	98.5	125.15	20985	152	trigger factor (tig)	5.2.1.8	Protein fate	Protein and peptide secretion and trafficking
DVU2928	7.0136	553.65	14.6667	21.333	292.28	17	20.944	454.25	10.6667	193.3	7955.5	174.5	80.817	5763.5	156.5	168.35	7724.9	164.5	DNA-directed RNA polymerase, beta subunit (rpoB)	2.7.7.6	Transcription	DNA-dependent RNA polymerase
DVU1023	2.1175	186.62		2.1878	190		2.3958	228.3		192.97	71.927		7.2647	123.66		8.1541	144.26		rhomboid family protein		Unknown function	General
DVU1834				9.3694	448.05	6.66667	4.2855	337.47	2.33333	186.26	11439	44.5	213.14	14808	63.5	257.33	12591	50	pyruvate carboxylase, putative		Energy metabolism	Glycolysis/gluconeogenesis
DVU1179	4.2303	468.92		9.3877	562.47					170.37	30785	523	300.46	22092	541.5	187.48	23612	350	aldehyde:ferredoxin oxidoreductase, tungsten-containing (aor)s	1.2.7.-	Central intermediary metabolism	Other
DVU1833				21.961	425.02	38	17.863	325.65	10	163.61	4939.6	262.5	164.83	3958	295	332.23	2615.1	335	phosphoenolpyruvate synthase, putative		Energy metabolism	Glycolysis/gluconeogenesis
DVU2925				7.5949	693.72		5.3926	396.28	4	163.56	34925	169	210.47	27278	174.5	147.83	31611	138.5	ribosomal protein L1 (rplA)		Protein synthesis	Ribosomal proteins: synthesis and modification
DVU3030	6.0101	763.28	8.66667				5.8903	298.8	10	162.7	18898	341.5	238.39	19174	307	30.98	3171.3	179	acetate kinase (ackA)	2.7.2.1	Energy metabolism	Fermentation
DVU2929	7.8956	698.63	13.3333	14.424	443.1	19.3333	16.586	481.97	12.6667	134.74	4621.6	176	105.35	3788.3	85.5	166.39	4748.9	137.5	DNA-directed RNA polymerase, beta prime subunit (rpoC)	2.7.7.6	Transcription	DNA-dependent RNA polymerase
DVU0694	18.169	734.68	1.66667	4.1537	149.7	1.33333	9.9887	472.87		125.66	7227.4	140	75.905	3891.9	105	78.559	4301.9	176.5	molybdopterin oxidoreductase, molybdopterin-binding subunit, putatives		Energy metabolism	Electron transport
DVU1067				4.123	318.77	1.33333	4.6814	366.55		120.58	24590	104	76.869	9620.7	90	27.998	5016.6	74.5	membrane protein, Bmp family		Cell envelope	Other
DVU0874	6.4737	1022	8.33333	6.2764	582.18	9.66667	6.8541	567.52	8.66667	113.85	19185	93	111.73	17737	103.5	66.483	18002	85.5	ribosomal protein S2 (rpsB)		Protein synthesis	Ribosomal proteins: synthesis and modification
DVU1574	4.9147	969.45	11				4.2556	512.5	12	111.9	30991	245	111.94	19961	223	57.509	26792	229.5	ribosomal protein L25 (rplY)		Protein synthesis	Ribosomal proteins: synthesis and modification
DVU3185	15.285	1977.3	53	10.465	1342.6	53	8.3482	834.48	46.6667	104.86	30402	226.5	74.525	16792	221.5	15.861	5622.7	207.5	rubredoxin-oxygen oxidoreductase (roO)		Energy metabolism	Electron transport
DVU0107	9.5008	1015.5	15	4.3532	222.2	4.33333	8.1206	526.92	16.6667	104.78	25833	12.5	125.89	21212	30.5	52.145	16886	10	glutamine ABC transporter, periplasmic glutamine-binding proteins(glnH)		Transport and binding proteins	Amino acids, peptides and amines
DVU0775	50.108	2228.6	49.3333	23.76	711.53	30.3333	39.798	1198.4	38.3333	95.688	9426.1	418	114.78	5251.5	447	124.78	13018	390.5	ATP synthase, F1 beta subunit (atpD)	3.6.3.14	Energy metabolism	ATP-proton motive force interconversion
DVU2499	8.1874	1278.9		6.4766	665.75	3.33333	12.881	861.6		95.204	16612	6.5	87.354	14967	8	53.357	8242.6	5	cell division protein FtsZ (ftsZ)		Cellular processes	Cell division
DVU2543	28.973	2605.8	22.3333	10.948	642.37	21.3333	22.4	4417.2	21	94.31	11286	39.5	191.19	13103	54.5	21.356	3003	10	hybrid cluster protein		Unknown function	Enzymes of unknown specificity
DVU1917	1.5276	98.4		2.5226	89.8		4.5278	146.25		94.184	16447	90	85.863	11485	117.5	32.236	5504.7	74.5	periplasmic [NiFeSe] hydrogenase, small subunit (hysB)s	1.18.99.1	Energy metabolism	Electron transport
DVU3027	7.3022	555.2		5.1677	305.13	1	11.546	414.27		92.878	6496.8	432	182.44	9416.6	568	50.031	3109.7	466	glycolate oxidase, subunit GlcD (glcD)		Energy metabolism	Other
DVU2927	13.428	5115	30.3333				14.482	2211.8	41.6667	91.813	23753	265.5	46.777	12211	323	40.784	20304	123.5	ribosomal protein L7/L12 (rplL)		Protein synthesis	Ribosomal proteins: synthesis and modification
DVU3026	1.8006	287.62		4.7716	246.53		12.376	877.87		85.736	9962.3	1	170.09	8774.4	10	32.995	1472.9	3	L-lactate permease family protein		Transport and binding proteins	Carbohydrates, organic alcohols, and acids
DVU1468	11.311	2059.2	5.33333	22.362	1795.1	13				85.634	9026.7	40	62.977	6187.8	70	24.094	3514	52	peptidase/PDZ domain protein		Protein fate	Degradation of proteins, peptides, and glycopeptides
DVU2370	6.403	732.33					2.872	402.72		81.983	15153	9.5	42.931	8149.3	7.5	9.8764	3472.9	3.5	outer membrane protein OmpH, putative		Cell envelope	Other
DVU1937	21.571	1287.2	18.6667	13.461	861.55	10.6667	15.312	1153.3	19	80.695	6896.6	181.5	115.29	5816	124.5	35.549	3228.9	48	phosphonate ABC transporter, periplasmic phosphonate-binding protein,sputative		Transport and binding proteins	Other
DVU3171	13.237	3937	3.33333	5.2353	966.25		11.82	5719.2	1	79.909	24796		129.13	26178		57.418	18410		cytochrome c3		Energy metabolism	Electron transport
DVU1306	6.9616	1673.6	5				12.694	718.45	4	79.673	7300.9	40.5	121	7328.3	48.5	184.96	12286	26.5	ribosomal protein L2 (rplB)		Protein synthesis	Ribosomal proteins: synthesis and modification
DVU3190				9.5456	760.63	23.6667	7.6435	491.53	5.66667	79.179	13278	53.5	99.152	9444.2	110	70.435	4987.3	47	hypothetical protein		Hypothetical proteins
DVU0966	10.25	1073.6	35.3333	7.2764	493.1	26.3333	7.595	401.4	25.3333	78.4	16336	157.5	48.851	7186.8	278.5	23.331	4173.4	52	amino acid ABC transporter, periplasmic amino acid-binding proteins		Transport and binding proteins	Amino acids, peptides and amines
DVU0186	4.2122	436.32	3.66667	22.533	3841.6	3.66667	6.9215	983.85	7.33333	78.377	17977	38	70.516	13700	73.5	32.834	9342.8	20	conserved hypothetical protein		Hypothetical proteins	Conserved
DVU1537	5.5879	1090		11.532	1294.3		5.8444	755.57		76.912	30154	112.5	73.218	27205	118.5	44.593	17131	87.5	lipoprotein, putative		Cell envelope	Other
DVU0386				4.7126	258.98	10	3.1642	218.55	6.33333	76.904	17407	15.5	27.563	5429.9	19.5	25.571	7164.1	14	amino acid ABC transporter, periplasmic amino acid-binding proteins		Transport and binding proteins	Amino acids, peptides and amines
DVU2449	6.3668	1437.4	18.6667	7.6776	1073.8	17	11.57	670.05	14.3333	75.872	24351	107.5	79.494	16535	113	32.908	9199.1	68	S-adenosylmethionine synthetase (metK)	2.5.1.6	Central intermediary metabolism	Other
DVU0251	3.9922	759.58		6.9862	931.95		14.65	1521.1		68.574	16668	15.5	91.181	15366	39	52.092	9994.8	2	membrane protein, putative		Cell envelope	Other
DVU0132	5.061	887.67		5.3513	589.7		11.395	1669.1		67.805	14452	19.5	93.182	9082.6	48	18.923	3368.2	36.5	membrane protein, putative		Cell envelope	Other
DVU1303				14.875	1785		14.704	981.8		66.526	11857	323.5	94.288	15448	216	134.83	25261	247	ribosomal protein L3 (rplC)		Protein synthesis	Ribosomal proteins: synthesis and modification
DVU1278	3.3176	399.7		6.5131	380.97		14.784	397.48		66.145	10441	35	53.039	6870.4	24	28.822	4663.2	19	cell division protein FtsH (ftsH)	3.4.24.-	Cellular processes	Cell division
DVU1238	11.269	1774	5.66667				5.7066	552.9	5.66667	64.119	12007	105	50.294	7173.4	79	9.6046	2006.7	35.5	amino acid ABC transporter, periplasmic amino acid-binding proteins		Transport and binding proteins	Amino acids, peptides and amines
DVU1043	7.2369	895.75	5.66667	7.7327	529.25	12.3333				60.694	13662	87	61.069	10627	71.5	41.805	10331	69	GMP synthase (guaA)	6.3.5.2	Purines, pyrimidines, nucleosides, and nucleotides	Purine ribonucleotide biosynthesis
DVU0671	3.3902	276.88	4	4.4457	205.55	1.66667	7.4063	178.13		59.473	5929	83	38.484	2853.7	96	21.65	2100.8	85.5	conserved hypothetical protein		Hypothetical proteins	Conserved
DVU1443	4.766	469.58		4.8048	358.3		12.698	389.93		59.364	19250	81.5	70.94	12196	114	20.7	5701.9	83.5	flagellar hook protein FlgE (flgE)		Cellular processes	Chemotaxis and motility
DVU2402	15.78	1835.5	6.66667	6.4617	801.6	6.66667	15.902	2278.3	10.6667	58.788	10673	51	122.68	9376.9	43.5	14.514	1985	54	heterodisulfide reductase, A subunit (hdrA)		Energy metabolism	Electron transport
DVU1304	6.4333	1625.6	4.66667				5.7004	719.85	3	57.495	17759	177.5	66.159	15123	131.5	47.882	26979	197.5	ribosomal protein L4 (rplD)		Protein synthesis	Ribosomal proteins: synthesis and modification
DVU1337				30.432	997.62	9.33333				57.283	6460.2	20.5	50.6	4895.5	37.5	47.112	4469.4	13.5	ATP-dependent protease La (lon)	3.4.21.53	Protein fate	Degradation of proteins, peptides, and glycopeptides
DVU1013										57	26859	253.5	78.225	15644	260.5	28.005	18626	242	type I secretion outer membrane protein, TolC family		Protein fate	Protein and peptide secretion and trafficking
DVU0253							12.705	735.1		55.696	17192	95.5	118.14	17021	143.5	37.205	5866.9	94.5	oxidoreductase, FAD/iron-sulfur cluster-binding domain proteins		Energy metabolism	Electron transport
DVU1310	7.6617	4697.7	1	12.626	2029		7.0638	1177.3		55.192	17079	32.5	46.24	9370.2	14.5	60.085	17051	18	ribosomal protein L16 (rplP)		Protein synthesis	Ribosomal proteins: synthesis and modification
DVU0776				3.9339	379.45					54.988	8598.6	35	42.852	5424.2	34	54.446	13657	22	ATP synthase, F1 gamma subunit (atpG)	3.6.3.14	Energy metabolism	ATP-proton motive force interconversion
DVU2586				16.658	596.35		9.0151	288.77		53.998	10253	52	76.477	8708.3	46	37.316	4946.7	57	ABC transporter, ATP-binding protein		Transport and binding proteins	Unknown substrate
DVU0261	18.264	4976.4	3				14.407	9754.2	6	52.972	19001	135.5	34.833	10879	164	19.832	7498.3	90.5	universal stress protein family		Cellular processes	Adaptations to atypical conditions
DVU0665				6.4264	1112	4	3.7909	419.52	3.33333	51.707	15266	17.5	29.904	10994	16.5	15.822	5687.6	17	nitrogen fixation protein nifU		Central intermediary metabolism	Nitrogen fixation
DVU3029	9.4387	1467.5		10.46	730.8	7.66667	19.552	942.45		50.832	8386.5	355.5	125.56	9999.8	376.5	27.357	2492.8	237.5	phosphate acetyltransferase (pta)	2.3.1.8	Central intermediary metabolism	Other
DVU3183							14.889	14120	113.333	50.682	31489	90	50.555	26514	59.5	18.044	9642.9	66.5	desulfoferrodoxin (rbO)		Energy metabolism	Electron transport
DVU3028	8.951	776.6		4.8719	523.18		12.761	1073.3		48.349	5899.1	28.5	70.806	5930.8	54.5	21.844	2653.6	16.5	iron-sulfur cluster-binding protein		Energy metabolism	Electron transport
DVU0848	15.107	2461	11.6667	5.5674	601.12	3.33333	9.4498	1321	19.3333	47.464	11803	200.5	38.44	7055.1	199	45.752	10726	173.5	heterodisulfide reductase, putative		Energy metabolism	Electron transport
DVU2177	3.2816	210.35		2.8789	168.4		75.192	410.9		47.07	7013.5		110.62	9726.8		35.481	7665.1		hypothetical protein		Hypothetical proteins
DVU2655	5.0737	369.02		8.8955	400.3		8.1044	454.15		47.044	10582		120.26	14086		34.146	12281		D-alanyl-D-alanine carboxypeptidase family protein		Cell envelope	Biosynthesis of murein sacculus and peptidoglycan
DVU1309	5.5543	2002	11.6667				6.0012	678.15	11	47.013	10677	143.5	45.37	7915.3	97	51.62	11695	131.5	ribosomal protein S3 (rpsC)		Protein synthesis	Ribosomal proteins: synthesis and modification
DVU2924	7.9213	2616.5		6.1905	1064.5		6.0904	707.2		46.836	31755	98.5	60.215	22891	68.5	68.731	27319	67	ribosomal protein L11 (rplK)		Protein synthesis	Ribosomal proteins: synthesis and modification
DVU3033	2.4965	317.9		3.7463	186.68	4	11.178	445.8		46.052	4554.8	307	56.899	4895.4	314.5	32.943	1517.7	226	iron-sulfur cluster-binding protein		Energy metabolism	Electron transport
DVU1329	11.222	2184.2	6.66667	12.441	1399.6	15.3333	8.9699	1363.9	7	45.516	10038	108	64.68	10346	86	38.508	14332	112.5	DNA-directed RNA polymerase, alpha subunit (rpoA)	2.7.7.6	Transcription	DNA-dependent RNA polymerase
DVU2078	25.592	1100.7		5.9453	537.57		10.588	880.73		45.052	35464	20.5	102.07	27064	13.5	13.088	9349.5	12	protein-glutamate methylesterase CheB (cheB-2)	3.1.1.61	Cellular processes	Chemotaxis and motility
DVU3094				18.891	3946.3	10.6667				44.124	24678	288							rubrerythrin (rr)		Energy metabolism	Electron transport
DVU0863	3.9263	453.88		12.668	621.65		14.131	405.17		43.061	5458.5	8.5	44.843	3461.9	4.5	7.0077	1748.9	2.5	flagellar hook-associated protein 2, putative		Cellular processes	Chemotaxis and motility
DVU3253	5.2721	883.95		3.9661	332.85	2.66667	7.4497	511.58		42.314	11668	9.5	45.062	7815.6	33	12.64	3223.7	6	phenylacetate-coenzyme A ligase, putative		Energy metabolism	Other
DVU0789	5.8967	682.4		5.3114	664.25		5.4508	560.32		40.489	10522	31	57.467	11086	43.5	25.235	8854.7	24.5	rod shape-determining protein MreB (mreB-1)		Cell envelope	Biosynthesis of murein sacculus and peptidoglycan
DVU1299	5.7372	1528	7.33333	7.1133	1194.7	5.66667	5.3721	722.3	6.33333	40.304	12558	87	50.184	12277	74.5	49.492	15175	62	ribosomal protein S7 (rpsG)		Protein synthesis	Ribosomal proteins: synthesis and modification
DVU0684	6.698	1950.5		6.2886	1120.5		5.4529	1507.3		40.249	23487	22	49.153	16196	32	18.181	12473	28	hflK protein, putative		Protein fate	Degradation of proteins, peptides, and glycopeptides
DVU1203	8.1969	1168.9	17.3333				16.189	896.42	20	39.979	7499.9	75.5	27.143	3480.8	242	24.621	4182.5	40	serine hydroxymethyltransferase (glyA)	2.1.2.1	Amino acid biosynthesis	Serine family
DVU1065	11.423	457.05		9.3423	373.73		4.3663	337.68		39.173	7155	30	61.691	6500.8	30.5	18.4	3622.4	29.5	peptidyl-prolyl cis-trans isomerse domain protein		Protein fate	Protein folding and stabilization
DVU0870	4.0611	896.98	4	4.8071	673.4	2.66667	2.3266	414.55	1	38.801	10331	18.5	21.484	6647.1	21	21.17	9207.2	6	ribosome recycling factor (frr)		Protein synthesis	Translation factors
DVU2518										38.715	29937	26.5	57.133	29580	34.5	39.059	32912	22.5	ribosomal protein L13 (rplM)		Protein synthesis	Ribosomal proteins: synthesis and modification
DVU1089	3.6505	390.15	6.33333	7.3801	280.75	16.3333	11.712	239.62	8	38.456	7460.5	48	55.22	6142.8	61	32.082	3381.6	36	alanyl-tRNA synthetase (alaS)	6.1.1.7	Protein synthesis	tRNA aminoacylation
DVU2837	4.2147	568.9					6.4523	1089.4	1	38.378	9024	16.5	29.764	5714.8	12.5	8.4562	2885.4	12	conserved hypothetical protein		Hypothetical proteins	Conserved
DVU3048	9.6532	1310.5	23	5.2603	728.57	14.3333	7.4353	1104.8	18.6667	37.638	12411	152.5	29.63	7689.5	116.5	15.362	4355.7	89	aspartate-semialdehyde dehydrogenase (asd)	1.2.1.11	Amino acid biosynthesis	Aspartate family
DVU2373	2.6999	671.98		13.327	460.15		19.239	437.05		37.628	4238.7	54	61.019	4893.4	57	94.622	3292.7	51.5	outer membrane protein, OMP85 family		Cell envelope	Other
DVU1927	5.6678	563.05	9.33333	6.0368	359.75	5.33333	8.1573	403.43	6	37.619	6856.9	54.5	24.136	4126.1	52.5	11.888	2099.9	31	isoleucyl-tRNA synthetase (ileS)	6.1.1.5	Protein synthesis	tRNA aminoacylation
DVU1059	2.4479	126.67		2.2874	102.25		2.8208	160.43		37.504	172.1		7.7833	149.53		4.7835	248.65		aminotransferase, putative		Unknown function	Enzymes of unknown specificity
DVU0764										36.784	36538	26	45.88	22612	29	25.28	12556	20.5	DNA-binding protein HU (hup-2)		DNA metabolism	Chromosome-associated proteins
DVU1090	4.4155	787.95		6.3283	715.17		5.9892	548.9		35.397	8135.8	14	24.859	5324.9	32.5	7.6202	2335.6	17	recA protein (recA)		DNA metabolism	DNA replication, recombination, and repair
DVU1930	8.649	936.1		7.8994	678.07		3.8397	364.33		35.125	6563.9	13.5	24.582	3325.6	21	6.7058	1502	54.5	TPR domain protein		Unknown function	General
DVU2926	12.324	10282	3.33333	17.267	4017.2	6	7.9019	2644.8	4.33333	34.291	16004	75	32.929	13282	120.5	37.068	19564	49.5	ribosomal protein L10 (rplJ)		Protein synthesis	Ribosomal proteins: synthesis and modification
DVU2084	2.3667	258.88		4.0292	280.53		3.9336	289.15		34.242	196.98		4.6999	231.51		3.5607	181.3		oligopeptide-binding protein, putative		Transport and binding proteins	Unknown substrate
DVU1615	2.5996	285.65	1.33333	3.712	482.98					34.059	12351	11.5	44.693	11963	14.5	12.156	7340.8	7.5	phenylacetate-coenzyme A ligase (paaK-2)	6.2.1.30	Energy metabolism	Other
DVU3139	4.0381	536.5		2.5546	312.9		7.6514	856.45		33.822	194.56		9.4299	235.67		5.8323	232.27		bacterial extracellular solute-binding protein, family 3s		Transport and binding proteins	Unknown substrate
DVU0404	6.7268	2752.8	32.6667	6.9808	1367.9	19.6667	5.8267	1460.5	36.6667	33.192	35376	76	36.787	22119	143.5	52.708	33820	119	dissimilatory sulfite reductase B		Central intermediary metabolism	Sulfur metabolism
DVU0752	9.9479	1615.1	10.6667	7.7297	571.05	6.66667				32.996	8372.2	44.5	31.758	5631	24.5	17.393	3800.2	9	amino acid ABC transporter, amino acid-binding proteins		Transport and binding proteins	Amino acids, peptides and amines
DVU1469	9.5623	471.27		5.7196	336.85		9.1858	284.45		32.994	6292.8	112	24.326	3363.3	122.5	11.507	3076.9	129.5	ribosomal protein S1, putative		Protein synthesis	Ribosomal proteins: synthesis and modification
DVU2013	34.432	2071.8	23.6667	14.669	859.45	15.6667	42.544	1957.5	26	32.944	419.56	139.5	18	314.96	169.5	13.464	364.47	66	hybrid cluster protein		Unknown function	Enzymes of unknown specificity
DVU2293	3.3823	653.72		2.3052	481.57		1.654	214.22		32.756	22037	11.5	23.8	17167	6.5	12.145	9659.4	11	iron-sulfur protein CooF (cooF)		Energy metabolism	Electron transport
DVU2150				2.5027	483.73		2.2373	341.92	1.33333	32.126	23282	23	24.693	14806	7.5	15.421	12307	12	dnaK suppressor protein, putative		DNA metabolism	DNA replication, recombination, and repair
DVU1248							5.2532	237.8	4.33333	32.013	7157.5	22.5	58.784	6363.5	26	43.86	10897	12.5	arginyl-tRNA synthetase (argS)	6.1.1.19	Protein synthesis	tRNA aminoacylation
DVU1328							5.894	1119	11.6667	31.903	10057	252.5	48.598	12103	416.5	52.863	20000	252	ribosomal protein S4 (rpsD)		Protein synthesis	Ribosomal proteins: synthesis and modification
DVU1320	5.9988	2310.4	10.3333	7.7775	1208.1	7	6.1093	756.48	9	31.289	11757	212	22.417	6831.2	286	41.634	17463	144.5	ribosomal protein S5 (rpsE)		Protein synthesis	Ribosomal proteins: synthesis and modification
DVU0927	3.132	801.85	3				3.0712	547.02	2.33333	31.251	24622	59	32.595	21658	64.5	26.18	27478	52	ribosomal protein L21 (rplU)		Protein synthesis	Ribosomal proteins: synthesis and modification
DVU3080	7.3468	2769.5		4.3007	911.8		5.0836	2201.6		30.995	24482	18.5	45.909	31364	12	15.872	15991	13	transcriptional regulator, putative		Regulatory functions	DNA interactions
DVU3367	2.6438	254.6	5				3.8172	144.45	5.66667	30.505	5884.9	13	36.328	4617.9	21	17.997	5569.9	14	aspartyl-tRNA synthetase (aspS)	6.1.1.12	Protein synthesis	tRNA aminoacylation
DVU0607	13.382	1232	13.6667	9.6781	832.63	13	12.886	766.07	12.3333	30.215	4199	104	52.695	4191.4	71.5	36.818	5142.8	93	adenosylhomocysteinase (ahcY)	3.3.1.1	Central intermediary metabolism	One-carbon metabolism
DVU3084	4.4309	1357.5		5.2058	915.12		4.5718	1484		30.157	15360	15	40.273	19986	18.5	26.559	20279	13	transcriptional regulator, putative		Regulatory functions	DNA interactions
DVU3389	1.5119	145.43		4.1715	183.18		9.3165	174.03		29.487	4209.5	10	35.809	4263.1	8.5	39.234	2865.1	11	DNA topoisomerase I (topA)	5.99.1.2	DNA metabolism	DNA replication, recombination, and repair
DVU2259	5.178	689.82		4.7385	592.48		4.0983	336.78		29.446	8224.8		23.793	6528.5		11.368	4382.4		conserved hypothetical protein TIGR01033		Hypothetical proteins	Conserved
DVU0504				2.9706	492.85	2.66667	2.7915	600.6	2.66667	29.066	32795	14.5	46.892	28562	29				ribosomal protein S15 (rpsO)		Protein synthesis	Ribosomal proteins: synthesis and modification
DVU1819	7.3501	603.8		4.1066	309.3		15.318	344.95		28.998	12023	8.5	25.615	6733.7	10.5	8.7972	2932.3	8	protein-export membrane protein SecD (secD)		Protein fate	Protein and peptide secretion and trafficking
DVU0857	9.3661	1571.8	16.3333	17.98	1563.5	13.3333	6.5913	414	13.3333	28.863	11288	68.5	31.913	7413.5	46.5	17.798	3419.4	63	radical SAM domain protein		Unknown function	Enzymes of unknown specificity
DVU1042	3.8378	1041.3		4.3352	769.5		3.8218	696.67		28.718	14206	4	22.877	13021	3.5	16.533	13487	1.5	twin-arginine translocation protein TatB (tatB)		Protein fate	Protein and peptide secretion and trafficking
DVU3197	7.5633	971.77	6.33333	8.7037	974.85	6.33333	5.6206	842.77	7.33333	28.264	11209	34.5	23.094	7370.8	26.5	10.065	3853.1	19	branched-chain amino acid aminotransferase (ilvE)	2.6.1.42	Amino acid biosynthesis	Pyruvate family
DVU3204	4.6216	510.85	6	5.6854	499.13	6	8.3494	457.68	9.33333	28.025	10596	32	44.522	10884	47	30.31	13803	68	adenylosuccinate synthetase (purA)	6.3.4.4	Purines, pyrimidines, nucleosides, and nucleotides	Purine ribonucleotide biosynthesis
DVU0565	8.9078	2153.3	29	12.655	2320.2	37	5.3813	1909.4	43.6667	27.911	10895	53	29.427	9061	65	7.5805	3464.9	45.5	glyceraldehyde 3-phosphate dehydrogenase (gap-1)	1.2.1.12	Energy metabolism	Glycolysis/gluconeogenesis
DVU1289	18.155	1501.1		4.7211	439.8		16.529	849.35		26.716	4226.4	58	26.698	2706.8	56.5	14.584	2099.6	47.5	reductase, iron-sulfur binding subunit, putative		Energy metabolism	Electron transport
DVU1095	5.7846	596.17	4.33333							26.457	7377.9	57	16.806	3762.6	69	7.5434	1817.1	32.5	argininosuccinate synthase (argG)	6.3.4.5	Amino acid biosynthesis	Glutamate family
DVU1326	4.7727	3178.3	4.66667	8.6395	1868.9	10.6667	5.3473	1232.4	3	26.197	17231	21.5	34.843	14345	33	41.237	18137	37.5	ribosomal protein S13 (rpsM)		Protein synthesis	Ribosomal proteins: synthesis and modification
DVU1896							3.2276	511.17	3.33333	26.11	23439	121	34.512	19005	101.5	30.392	23773	60.5	ribosomal protein S20 (rpsT)		Protein synthesis	Ribosomal proteins: synthesis and modification
DVU2336	3.1421	315.3		3.9954	299.67	2.66667	2.4315	246.73		25.628	19354	26.5	32.454	14302	22	19.16	16211	25.5	carboxyl-terminal protease	3.4.21.-	Protein fate	Degradation of proteins, peptides, and glycopeptides
DVU1318										25.139	5191.8	112	34.574	3874.8	109.5	25.674	6562.8	90.5	ribosomal protein L6 (rplF)		Protein synthesis	Ribosomal proteins: synthesis and modification
DVU3032	2.7928	352.43		2.5317	180.03		2.1678	286.65		24.894	11075	165	20.607	9721.7	178.5	5.4386	2104.3	92	conserved hypothetical protein		Hypothetical proteins	Conserved
DVU1260	4.3418	487.87		2.4527	149.05		8.7601	477.58		24.695	20171	17.5	30.82	6161.6	10	8.2037	2329.2	10	outer membrane protein P1, putative		Cell envelope	Other
DVU0734	2.7313	238	1.33333	3.0147	195.22	12.3333	3.7268	136	3.66667	24.658	6299.1	51.5	27.696	4682.7	82.5	19.965	4034.9	66.5	uroporphyrinogen III synthase/methyltransferase		Biosynthesis of cofactors, prosthetic groups, and carriers	Heme, porphyrin, and cobalamin
DVU1052	3.1208	469.95		5.4452	716.12		7.3688	457.7		24.507	228.01		9.0609	155.49		6.145	225.84		CBS domain protein		Unknown function	General
DVU0034				4.9286	528.25	4	2.5054	316	3	24.338	20731	21.5	22.051	8966.6	21.5	9.5091	6395.1	10	DSBA-like thioredoxin domain protein		Unknown function	General
DVU0958	4.9579	1157	4.66667							24.333	11051	392.5	19.927	7308.1	340.5	20.956	8998.4	295.5	ribosomal protein L9 (rplI)		Protein synthesis	Ribosomal proteins: synthesis and modification
DVU1864				3.1324	702.1		3.4585	713.4	3.33333	24.168	16856	18	9.8245	7385	14.5	20.637	11347	15	DNA-binding protein HU, beta subunit, putative		DNA metabolism	Chromosome-associated proteins
DVU0918	10.079	2315.2		2.4569	416.75		5.7093	1668.9		24.12	22515	8	13.784	6276.9	16	12.522	8805.4	3.5	ATP synthase F0, A subunit (atpB)	3.6.3.14	Energy metabolism	ATP-proton motive force interconversion
DVU1322	5.0756	2504.8	1.66667				6.7982	1056.8	3	23.906	8142.8	53.5	22.789	7211.7	73	37.45	15927	40	ribosomal protein L15 (rplO)		Protein synthesis	Ribosomal proteins: synthesis and modification
DVU1575	4.5746	484.83		3.088	538.78	1.33333	4.8238	306.98		23.77	12379	12.5	51.807	11815	32	37.943	16098	10	ribose-phosphate pyrophosphokinase (prsA)	2.7.6.1	Purines, pyrimidines, nucleosides, and nucleotides	Purine ribonucleotide biosynthesis
DVU2496	5.4472	1715.4		6.7626	1107.5		4.1518	850.6		23.479	14059	6.5	24.869	11306	18	22.225	9338.8	4	lipoprotein, putative		Cell envelope	Other
DVU1795	4.7437	1579.4	7.33333	3.65	710.58	8.66667	4.412	1314	4.66667	23.412	13215	44.5	24.57	12708	23	14.059	12156	22.5	DNA-binding protein HU (hup-3)		DNA metabolism	Chromosome-associated proteins
DVU1020	4.2068	326.03		4.8231	222.95		9.1644	326.05		23.4	5498.8	24	29.163	3612.3	77.5	6.3737	1701.8	12	HD domain/sensory box protein		Regulatory functions	Small molecule interactions
DVU2201	9.0578	2038.7	52	6.7742	909.12	38.3333	17.717	2150	61	23.284	9827.2	174	46.064	13453	169.5	9.8578	6336.5	71.5	alcohol dehydrogenase, iron-containing		Energy metabolism	Fermentation
DVU1206	5.8849	703.63	3				2.3159	314.52	3.33333	23.265	35551	26	45.758	31296	38.5				3-oxoacyl-(acyl-carrier-protein) reductase (fabG)	1.1.1.100	Fatty acid and phospholipid metabolism	Biosynthesis
DVU2342	2.9463	196.3	5.66667							23.215	4316.9	26	23.798	3024.6	12.5	15.592	3616.1	3	amino acid ABC transporter, periplasmic amino acid-binding proteins		Transport and binding proteins	Amino acids, peptides and amines
DVU2530	6.0957	288.3	12	3.871	308.1	10	5.5438	118.87	11.3333	23.209	7957.6	41.5	26.498	4560.5	41.5	14.312	2368.8	69	transketolase (tkt)	2.2.1.1	Energy metabolism	Pentose phosphate pathway
DVU3379				7.3901	399.1	5.33333	9.4005	328.3		23.161	6495	42	110.71	11027	67.5	35.996	3316	47.5	ribonucleoside-diphosphate reductase		Purines, pyrimidines, nucleosides, and nucleotides	2'-Deoxyribonucleotide metabolism
DVU2347	3.1459	266.55	5.66667				3.6637	168.72	3.33333	23.046	10208	53.5	15.703	5680.3	68.5	8.2089	4043.7	21	acetylornithine aminotransferase (argD)	2.6.1.11	Amino acid biosynthesis	Glutamate family
DVU0843	8.7629	595.57		3.1629	326.5		6.6387	569.1		23.027	8733.5	11	21.163	6323.5	32.5	11.181	4208.8	12	hypothetical protein		Hypothetical proteins
DVU2070	2.658	111.52		2.8354	39.9		2.0932	81.8		22.842	260.34	6	8.3125	184.2	19	5.6812	267.31	5	TPR domain protein		Unknown function	General
DVU0070	5.2441	296.62		2.4181	257.05		4.9976	306.17		22.723	233.11		4.1338	328.35		1.4562	418.52		Ser/Thr protein phosphatase family protein		Unknown function	Enzymes of unknown specificity
DVU3392	14.202	1651.6	12.6667	9.0964	991.65	12	9.6937	1950.2	11.6667	22.708	6219.1	9	37.53	6871.6	25.5	20.089	2770.6	12	glutamine synthetase, type I (glnA)	6.3.1.2	Amino acid biosynthesis	Glutamate family
DVU1576	1.9146	65.3		2.1808	123.95		1.5876	102.97		22.444	31536		30.467	26920		22.148	30358		4-diphosphocytidyl-2C-methyl-D-erythritol kinase (ispE)s	2.7.1.148	Biosynthesis of cofactors, prosthetic groups, and carriers	Other
DVU1455	2.1813	214.53	7.33333	2.8774	318.72	9.33333				22.359	7443.7	10.5	12.007	4123	12	12.626	5483.1	8	conserved hypothetical protein		Hypothetical proteins	Conserved
DVU2356	4.0851	284.15		2.5583	262.9		4.7222	388.32		22.347	10722		20.539	6021.3		36.26	7883.9		membrane protein, putative		Cell envelope	Other
DVU0060	8.4907	633.15		5.0547	353.02		5.8607	301.25		21.944	9373.3	25.5	36.619	8477.6	24.5	22.413	13014	33	efflux transporter, RND family, MFP subunit		Transport and binding proteins	Unknown substrate
DVU2318							10.497	3878.9	9	21.769	10196	29							rubrerythrin, putative		Energy metabolism	Electron transport
DVU3310	7.2945	454.95		4.6324	267.53		6.7166	188.68		21.722	13795	13.5	25.596	12957	5	59.548	34983	41.5	ATP-dependent RNA helicase, DEAD/DEAH family		Transcription	Other
DVU2376	3.4469	392.1		4.9245	302.33		4.8945	276.88		21.718	7895.9	9	29.402	6105	54	6.3891	3223.8	11	lysyl-tRNA synthetase (lysS)	6.1.1.6	Protein synthesis	tRNA aminoacylation
DVU1543	2.722	211.8		2.8249	278.98		22.043	141.5		21.572	641.85		5.6379	600.58		4.4095	531.35		ATP-dependent helicase HrpB (hrpB)		Unknown function	Enzymes of unknown specificity
DVU0407	4.2358	984.17		4.5501	886.63		3.8869	964.5		21.531	26067		26.649	20237		38.698	32568		rare lipoprotein A family protein		Cell envelope	Other
DVU1817	6.3443	2280	11.6667	7.2577	1858.2	3.33333	9.6141	5400.2	12	21.512	22588		18.001	10806		9.2066	5057.6		cytochrome c-553 (cyf)		Energy metabolism	Electron transport
DVU1539	7.6361	881.1	20.3333				9.6361	398.02	12.3333	21.478	7170.6	39	29.805	6307.8	49.5	11.938	3608.4	32.5	fructose-1,6-bisphosphatase, class II (glpX)	3.1.3.11	Unknown function	General
DVU1655	6.2067	1545.8	15	8.026	1064.6	9.66667	7.0242	937.2	10.3333	21.308	16839	26	34.557	13419	81.5	17.818	10596	13.5	aminotransferase, classes I and II		Unknown function	Enzymes of unknown specificity
DVU1330	3.367	777.25	4.33333				3.5466	396.77	5.66667	21.236	23478	74	25.139	18131	113	29.661	31398	97	ribosomal protein L17 (rplQ)		Protein synthesis	Ribosomal proteins: synthesis and modification
DVU0881	21.36	1064.4	40	14.647	776.67	36.3333	19.426	697.67	38.3333	21.171	5947.6	63	47.063	5906.3	126.5	6.3764	1090.4	38	translation elongation factor G, putative		Protein synthesis	Translation factors
DVU0133	2.6611	215		3.6788	195.65		7.6086	680.67		21.064	3351.6	27.5	19.405	1641.3	17	4.3795	707.29	40.5	hypothetical protein		Hypothetical proteins
DVU2738				7.0071	545.03	1	6.5024	554.23		20.847	5094.7	36	17.736	3364.7	38	20.11	4895.1	25.5	methyl-accepting chemotaxis protein		Cellular processes	Chemotaxis and motility
DVU2297	4.7497	370.48		3.839	285.25	1.33333	4.1017	279.23	1.66667	20.737	12680	136	19.357	8343.2	128.5	19.367	17598	121	glycine/betaine/L-proline ABC transporter, periplasmic-bindingsprotein		Transport and binding proteins	Amino acids, peptides and amines
DVU2536	6.6138	5564.7		12.089	3340.2		6.087	3280.8		20.717	37482	3	30.419	31581	2.5	33.723	36606	8.5	ribosomal protein L35 (rpmI)		Protein synthesis	Ribosomal proteins: synthesis and modification
DVU0838	5.236	3660.1	1				5.038	2798.6	1.33333	20.63	21765	17.5	12.763	13410	14.5	11.468	15201	21	conserved hypothetical protein		Hypothetical proteins	Conserved
DVUA0058	9.0721	164.4		3.9416	177.97		6.4413	109.95		20.507	628.87		2.7819	560.05		0.70392	439.26		BNR/Asp-box repeat protein		Unknown function	General
DVU2428	3.0526	603.87		3.1312	631.83		3.5383	529.23		20.345	12562	300	17.742	11160	329	19.757	10943	309	lipoprotein, putative		Cell envelope	Other
DVU2671	11.087	1137.1		15.658	601.25		4.7797	443.8		20.273	6802.2	14.5	36.214	7258.9	16	44.066	10979	15.5	HDIG/HD/KH domain protein		Unknown function	General
DVU1842	6.3437	759.03		3.9493	424.1		5.3925	396.65		20.127	7018.6	15	20.284	4813.7	9	10.269	3672.2	6.5	lipoprotein, putative		Cell envelope	Other
DVUA0091	13.722	2770.5	15.3333	12.161	1451.3	22	20.121	5383.3	24.3333	19.952	9772.4	24	36.697	11805	49.5	13.632	4265.8	28.5	catalase (katA)	1.11.1.6	Cellular processes	Detoxification
DVU2444	19.907	9443.1		41.049	4358		15.919	5328.1		19.907	17702	10	34.279	21786	28.5	24.266	9678.2	6	flagellin		Cellular processes	Chemotaxis and motility
DVU0410	2.4719	391.52		2.8338	366.48		2.7553	384.13		19.833	13025	41.5	15.365	11887	52.5	10.03	8350.9	25.5	hypothetical protein		Hypothetical proteins
DVU2535	3.9909	1047.8		4.395	841.72		2.8271	596.9		19.713	10292	20.5	20.37	8318.7	31.5	16.899	8768.7	12	ribosomal protein L20 (rplT)		Protein synthesis	Ribosomal proteins: synthesis and modification
DVU3093	6.1709	4151.7		14.19	4265.2		7.549	4179.4		19.706	25398		27.568	29837					rubredoxin-like protein (rdl)		Energy metabolism	Electron transport
DVU0625	30.195	1822.8		14.795	764.85		16.611	2467.5		19.689	6186	19	35.243	4669.3	53	11.669	1584.7	8.5	cytochrome c nitrite reductase, catalytic subunit NfrA, putatives		Energy metabolism	Electron transport
DVU1204	14.602	1465.7	12.6667				5.1869	560.3	17.6667	19.68	6242.7	67.5	17.674	4034.8	61	18.449	6003.9	45	3-oxoacyl-(acyl-carrier-protein) synthase II (fabF)	2.3.1.41	Fatty acid and phospholipid metabolism	Biosynthesis
DVU1025	3.3696	469.5	14.3333	3.0905	253	11.3333	2.7913	261.33	11	19.638	9635.8	12.5	28.021	10618	12	15.403	8656.7	8.5	uracil phosphoribosyltransferase (upp)	2.4.2.9	Purines, pyrimidines, nucleosides, and nucleotides	Salvage of nucleosides and nucleotides
DVU1199	8.1173	809.15	5.33333	6.4386	525		6.4968	496.32	6.66667	19.429	4774.8	43	23.16	4199.2	56	31.225	4630.7	29.5	3,4-dihydroxy-2-butanone 4-phosphate synthase/GTP cyclohydrolase IIs(ribAB)		Biosynthesis of cofactors, prosthetic groups, and carriers	Riboflavin, FMN, and FAD
DVU1993	2.2015	422		5.6941	249.45		13.97	519.82		19.349	1695.7	2.5	23.742	1942.9	4.5	10.25	1665.7	4.5	cation-transporting ATPase, E1-E2 family		Transport and binding proteins	Cations
DVU2537	6.7096	3171.9		9.4141	1558.3		4.98	1337.8		19.317	8899.7	17.5	23.305	8824.2	9.5	8.6437	5244	7	translation initiation factor IF-3 (infC)		Protein synthesis	Translation factors
DVU1286	8.9666	797.45		2.8284	345.77		6.8292	641.92		19.311	17317		31.934	8984.4		14.298	7187.2		reductase, transmembrane subunit, putative		Energy metabolism	Electron transport
DVU0850	15.045	2650.6		5.6333	664.6		14.925	1840.3		19.291	4951.7	2.5	26.491	3369.9	21.5	15.688	3445	1	heterodisulfide reductase, transmembrane subunit, putatives		Energy metabolism	Electron transport
DVU3349	5.143	645.38	5.33333	3.7041	533.17	5.33333	4.3241	446.4	6.33333	19.265	12526	93	14.159	5880.2	63	6.0967	2602.8	33.5	pyruvate flavodoxin/ferredoxin oxidoreductase, thiamine diP-bindingsdomain protein		Energy metabolism	Fermentation
DVU0095	6.3315	553.67	11	8.0046	582.98	10.3333	6.2923	749.83	6.66667	19.264	7712.7	4	16.665	3416.6	1.5	6.803	1385.4	1	polyamine ABC transporter, periplasmic polyamine-binding proteins		Transport and binding proteins	Amino acids, peptides and amines
DVU0839				4.5939	1251.8	3.33333	4.3816	1498.7	4.33333	19.004	33255	14	27.195	24770	37	29.009	29153	24.5	ribosomal protein S16 (rpsP)		Protein synthesis	Ribosomal proteins: synthesis and modification
DVU0004	2.5431	531		6.569	311.1		6.0773	335.9		18.812	4430.3	9.5	24.979	4180.5	15	30.979	3027	8	DNA gyrase, A subunit (gyrA)	5.99.1.3	DNA metabolism	DNA replication, recombination, and repair
DVU1044	6.7985	804.63	6.33333	11.5	615.07	10				18.786	2796.9	28	31.018	2521	42.5	35.972	3096.2	39	inosine-5`-monophosphate dehydrogenase (guaB)	1.1.1.205	Purines, pyrimidines, nucleosides, and nucleotides	Purine ribonucleotide biosynthesis
DVU0322	9.9268	2139.6	38.3333	13.78	1540.1	32.3333	20.404	2847.2	38.3333	18.697	9863.9	205.5	33.249	9746.3	226	40.351	10939	226	enolase (eno)	4.2.1.11	Energy metabolism	Glycolysis/gluconeogenesis
DVU2923	15.503	2981.5		5.2144	1237.5		3.6832	789.15		18.53	19409	19.5	30.929	12679	20	15.905	20872	11.5	transcription antitermination protein NusG (nusG)		Transcription	Transcription factors
DVU1397	5.3407	3141.5	15.3333	17.166	3044.5	11.6667	8.3442	3316.4	15	18.456	24707	45	19.296	15227	64.5	9.9121	7921.7	47.5	bacterioferritin (bfr)		Transport and binding proteins	Cations
DVU2213	2.0467	116.9		2.2962	167.7		2.3085	115.93		18.225	366.93		5.7674	519.28		3.3806	446.48		nuclease domain protein		Unknown function	General
DVU1312	5.2337	3461.3	2.33333				4.0862	1208.3	2.33333	18.105	13050	50	10.758	7031.8	42	16.273	14497	50.5	ribosomal protein S17 (rpsQ)		Protein synthesis	Ribosomal proteins: synthesis and modification
DVU0036	5.1211	3174.1		18.313	6317.4		3.9106	2839.8		18.093	21590	6	25.762	34224	5.5	17.689	18977	2.5	hypothetical protein		Hypothetical proteins
DVU0501	3.1018	348.02	1.33333							18.048	9354.3	29	18.202	7081.1	47.5	12.349	6154.6	41.5	conserved hypothetical protein		Hypothetical proteins	Conserved
DVU1287	5.9717	1346.1		2.815	480.07		4.4979	812.7		17.992	8614.8	28.5	14.014	4613	17	8.6344	3110.5	16	reductase, iron-sulfur binding subunit, putative		Energy metabolism	Electron transport
DVU0780	6.622	3156.2		3.877	1050.1		5.8123	2352.7		17.977	19762	67.5	19.202	16775	45.5	30.469	31912	71.5	ATP synthase F0, B subunit, putative		Energy metabolism	ATP-proton motive force interconversion
DVU1690	3.3999	429.12		3.1369	541.5		3.6106	411		17.923	11785	27	18.606	6200.7	44.5	11.035	10895	15.5	transcriptional regulator, TetR family		Regulatory functions	DNA interactions
DVU1676	2.666	389.33		2.7153	656.73		3.5014	482.4		17.831	36851	5	28.157	25247	3	31.763	31866	1.5	preprotein translocase, SecG subunit (secG)		Protein fate	Protein and peptide secretion and trafficking
DVU1922	46.274	9858.2	25.3333	49.036	3314.7	25.6667	30.367	10873	20.6667	17.436	2882.5	7.5	35.666	2998.2	17.5	6.9633	1059	6.5	periplasmic [NiFe] hydrogenase, large subunit, isozyme 1 (hynA-1)s	1.18.99.1	Energy metabolism	Electron transport
DVU0307	3.3547	190.6		3.2901	226.1		5.7287	193.8		17.387	19755	7	24.13	11032	11.5	6.2283	5277.1	7.5	flagella basal body rod domain protein		Cellular processes	Chemotaxis and motility
DVU2744	4.7333	287.95	3	4.2239	127.95	1	15.131	573.55	3.66667	17.368	1704.6		17.959	1201		34.421	3053.5		high-affinity branched-chain amino acid ABC transporter, perisplasmicsamino acid binding protein		Transport and binding proteins	Amino acids, peptides and amines
DVU0957	3.2855	1375.2	2.66667	4.3298	1042.4		3.9401	1373.5	1.66667	17.358	15444	66.5	31.857	30188	54.5	26.975	32113	67	ribosomal protein S18 (rpsR)		Protein synthesis	Ribosomal proteins: synthesis and modification
DVU2364	3.2535	268.98		2.7755	148.98		3.4987	195.6		17.281	16038	29	15.779	8556.7	42.5	6.1979	4371.9	15	aminotransferase, classes I and II		Unknown function	Enzymes of unknown specificity
DVU1092	1.1756	98.2		3.8315	152.93		5.3545	181.22		17.129	4702		17.762	2302.2		10.599	791.27		sodium-dependent symporter family protein		Transport and binding proteins	Unknown substrate
DVU1434	3.1746	659.25	1.33333	3.9395	951.6		3.0359	517.9		16.917	12585	8.5	9.7929	5527.4	3.5	6.4185	4014	4	hypothetical protein		Hypothetical proteins
DVU2740	2.4063	234		3.0209	287.9		3.1771	291.72		16.889	247.32		5.7454	236.47		4.3146	414.45		high-affinity branched-chain amino acid ABC transporter,sATP-binding protein (livF)		Transport and binding proteins	Amino acids, peptides and amines
DVU0266							10.639	2931.7	4.66667	16.883	12313	66	18.917	8290.3	46	9.1733	5025.1	86	hypothetical protein		Hypothetical proteins
DVU2980	3.9497	849.35		4.2117	872.7		3.3261	681.13		16.817	15464		21.958	14875		16.753	16014		CDP-diacylglycerol--serine O-phosphatidyltransferase (pssA)s	2.7.8.8	Fatty acid and phospholipid metabolism	Biosynthesis
DVU3113	3.2622	382.4		3.1328	315.93		3.9415	280.82		16.795	13330	5.5	31.641	15759	25.5	6.8535	6304.6	8.5	carbamoyl-phosphate synthase, small subunit (carA)	6.3.5.5	Purines, pyrimidines, nucleosides, and nucleotides	Pyrimidine ribonucleotide biosynthesis
DVU1078	8.2691	397.13		6.1924	358.05		3.9158	287.45		16.638	2517.6	20	34.199	4075.9	25.5	15.995	2842.3	31	R3H domain protein		Unknown function	General
DVU0917	7.6012	6086.5		3.8505	1234.9		10.851	5944.4		16.631	29862	2	15.298	16230	1	29.101	19745	2	ATP synthase F0, C subunit (atpE)	3.6.3.14	Energy metabolism	ATP-proton motive force interconversion
DVU0778	4.2458	1974.5		2.7148	374.22		3.2138	714.57		16.628	6579.3	12	10.493	3754.1	28	17.055	7140	18	ATP synthase, F1 delta subunit (atpH)	3.6.3.14	Energy metabolism	ATP-proton motive force interconversion
DVU3104	20.619	3351	48.3333							16.57	5790.1	191.5	23.815	5065.2	280.5	9.7014	4320.1	148	peptidoglycan-associated lipoprotein, putative		Cell envelope	Other
DVU2451	0.45865	87.7		3.5251	149.57		5.6649	225.8		16.569	9605.6	5	33.642	5156.8	15.5	9.3066	1350.4	4	L-lactate permease family protein		Transport and binding proteins	Carbohydrates, organic alcohols, and acids
DVU2500	4.5697	876.15	1.66667				6.8044	496.15		16.543	5369.8	26.5	26.16	5362	51.5	9.9645	3365.5	20.5	cell division protein FtsA (ftsA)		Cellular processes	Cell division
DVU0142							4.2097	495.13	7.33333	16.533	8579.6	13.5	15.392	6029.5	21	13.36	7080.9	3	tryptophanyl-tRNA synthetase (trpS)	6.1.1.2	Protein synthesis	tRNA aminoacylation
DVU1904	5.8602	1717.2	4.33333	7.1968	1507.6	5.66667	6.4616	2087.7	4	16.475	12511	26	14.328	10092	31.5	9.1081	7418.1	12	chemotaxis protein CheW (cheW-2)		Cellular processes	Chemotaxis and motility
DVU1205	7.0997	2455.3	3.33333	3.3341	1019.5	2.33333	2.7299	799.92	2.33333	16.285	13357		12.699	11216		11.335	11784		acyl carrier protein (acpP)		Fatty acid and phospholipid metabolism	Biosynthesis
DVU2383	12.709	325.58		19.444	434.1		11.45	297.97		16.259	455.46		4.9711	468.41		2.1883	542.85		tonB dependent receptor domain protein		Unknown function	General
DVU0138	3.1674	1459	1.33333				3.943	1880.2	1.33333	16.144	14616	1	14.517	13435	1	5.4817	5481.5	1	response regulator		Regulatory functions	Protein interactions
DVU2538	6.5633	698.6	5.66667	8.9586	591.68	2.66667	8.2337	561.3	8.33333	16.071	5911	45	43.892	6855.8	43.5	22.291	5595.4	37.5	threonyl-tRNA synthetase (thrS)	6.1.1.3	Protein synthesis	tRNA aminoacylation
DVU3063	2.6584	131.73		2.7333	38.575		9.9391	151.62		16.061	568.92		3.4014	564.4		1.8454	540.9		integral membrane protein MviN (mviN-2)		Unknown function	General
DVU1579							6.0466	450.02	1.66667	15.99	6026.5	12.5	21.174	5138.7	7.5	8.0897	3381.7	7	cysteinyl-tRNA synthetase (cysS)	6.1.1.16	Protein synthesis	tRNA aminoacylation
DVU2839	5.1094	1496.9		5.564	1605.8		10.377	3124.4		15.983	23105		14.044	11906		18.175	15611		conserved hypothetical protein		Hypothetical proteins	Conserved
DVU0149	2.1788	230.6		3.1755	200.97		3.4751	158.15		15.86	2923.4		17.538	1917.9		6.5491	1264.8		membrane protein, putative		Cell envelope	Other
DVU1628	2.8265	268.33		3.8582	179.62		4.4725	348.8		15.824	3147.6		25.403	3509.3		11.129	5185.2		RNA polymerase sigma-54 factor (rpoN)		Transcription	Transcription factors
DVU3359	3.0012	396.85		2.2544	455.28		2.8957	353.65		15.821	14171		11.392	7330.1		5.0152	3495.5		hypothetical protein		Hypothetical proteins
DVU1302							4.29	876.48	4.66667	15.809	16844	87	22.159	16870	147.5	20.876	20956	124.5	ribosomal protein S10 (rpsJ)		Protein synthesis	Ribosomal proteins: synthesis and modification
DVU0761	3.7002	660.08		2.5304	327.95		2.8824	360.55		15.785	18413	62.5	11.175	10088	47	5.713	4671.4	40	lipoprotein, putative		Cell envelope	Other
DVU3198	4.944	245.7		2.7909	180.5		4.2037	196.62		15.551	15730	3.5	13.13	8332.6	9.5	4.3535	4686.1	2	DNA polymerase III, gamma and tau subunits, putative		DNA metabolism	DNA replication, recombination, and repair
DVU2299	4.3353	553.77		3.4347	257.65		6.4926	317.27		15.503	15708	109	22.134	17417	106.5	37.779	36609	124	glycine/betaine/L-proline ABC transporter, ATP binding proteins		Transport and binding proteins	Amino acids, peptides and amines
DVU2791	4.7693	683.65		2.6115	530		3.3179	667.05		15.493	10736		12.081	5877.6		3.6879	1824.5		cytochrome c family protein		Energy metabolism	Electron transport
DVU0943	2.715	476.25		8.0008	374.22		8.4002	403.12		15.474	1365.6	6	31.26	1719.9	14	10.647	1716.1	8	membrane protein, putative		Cell envelope	Other
DVU0840	1.5765	215.05		4.4308	137.58		5.3228	231.23		15.458	4057.1	4.5	36.95	5115	4	18.766	4102.4	4	signal recognition particle protein (ffh)		Protein fate	Protein and peptide secretion and trafficking
DVU2127	2.7487	133.57		3.1851	112.2		5.6195	193.38		15.437	379.62		6.5782	388.6		5.1694	263.5		von Willebrand factor type A domain protein		Unknown function	General
DVU2789	1.8882	134.25		2.2399	104.47		3.4135	145.33		15.333	291.97		4.8082	314.92		5.2688	246.57		Gpr1/Fun34/YaaH family protein		Unknown function	General
DVU1411	3.8826	361.35		4.0672	384.38		6.3914	265.5		15.271	9081.3	54.5	30.606	10699	113	6.9917	3299.5	25	thiamine biosynthesis protein ThiC (thiC)		Biosynthesis of cofactors, prosthetic groups, and carriers	Thiamine
DVU2286	16.672	308.33		3.2885	138.72		6.0818	81.55		15.247	8625.9	4	36.658	5345.8	6.5	12.049	3433.1	3.5	hydrogenase, CooM subunit, putative		Energy metabolism	Electron transport
DVU0953				3.504	125.75	3	2.9776	178.15	2.33333	15.227	7768.4	19.5	12.799	3787.5	24	4.7963	1790.4	12	tyrosyl-tRNA synthetase (tyrS)	6.1.1.1	Protein synthesis	tRNA aminoacylation
DVU0002				4.2164	593.4	5.66667	4.9237	486	6.33333	15.148	5540.8	50.5	15.404	4247.3	25.5	11.079	3374.6	38.5	DNA polymerase III, beta subunit (dnaN)	2.7.7.7	DNA metabolism	DNA replication, recombination, and repair
DVU0995	4.6134	1481.6	17.3333	7.7536	1317.3	22.3333	5.6347	1047.7	14.6667	15.147	22028	68.5	18.998	16417	75	5.4133	5313.5	22.5	ThiJ/PfpI family protein		Unknown function	General
DVU1236	2.9609	388.3		3.2945	254.85		3.8984	228.55		15.14	5921.2	5	15.68	4722.8	2.5	6.2864	2099.6	2	amino acid ABC transporter, ATP-binding protein		Transport and binding proteins	Amino acids, peptides and amines
DVU1837	4.3752	824.3		2.9133	377.93		2.3207	304.67		15.116	8401.7	2.5	21.642	8308.3	15	5.476	3009.9	5.5	competence protein, putative		Cellular processes	DNA transformation
DVU2330	3.8029	491.13		2.5694	226.88	2.33333	2.7716	230.03		15.005	9378.2	7	14.223	5743	10	7.1156	3281.1	5.5	MRP family protein		Unknown function	General
DVU1857	13.3	562.15		7.559	524.05		7.6419	367.78		14.925	4207.1	17	22.281	3751.8	11	10.657	2931	5.5	methyl-accepting chemotaxis protein		Cellular processes	Chemotaxis and motility
DVU0305	3.0964	1262.1		2.3319	789.92		3.1151	1206.2	1.66667	14.737	35362		12.46	22895		12.613	17238		ferredoxin II		Energy metabolism	Electron transport
DVU0677	6.3324	487.38		4.6839	413.42		6.7781	403.27		14.714	5258.9		26.098	6224.2		11.89	4442.2		transglycosylase domain protein		Unknown function	General
DVU2697	2.0222	196.4	1.33333	2.1212	122.15		2.5118	262.02	1.66667	14.636	13588		5.9707	4510.3		8.1678	6789.5		hypothetical protein		Hypothetical proteins
DVU0443	2.778	131.22		2.4194	125.4		3.0436	149.75		14.628	362.58		5.6042	377.83		3.6014	341.14		exonulcease, putative		Unknown function	Enzymes of unknown specificity
DVU2808	3.2968	324.65		2.6039	235.63		3.1152	309.85		14.574	331.35		5.0582	394.35		4.5561	253.33		TonB domain protein		Unknown function	General
DVU2914	3.441	315.15		4.3758	345.35	1.33333	3.0877	307		14.559	4929.8	3	29.501	6822.7	4	30.617	13831	4.5	peptide chain release factor 1 (prfA)		Protein synthesis	Translation factors
DVU1228	4.9213	2683.7	7.66667	7.5542	1730.1	13.3333	5.6542	1699.8	9	14.551	8528.5	85	9.5904	5412.9	56.5	6.4834	4921.5	95.5	thiol peroxidase (tpX)	1.11.1.-	Cellular processes	Detoxification
DVU0707	4.1946	245.77								14.523	879.7		14.714	878.78		5.4196	653.42		TRAP dicarboxylate family transporter		Transport and binding proteins	Carbohydrates, organic alcohols, and acids
DVU2650	17.907	20426		16.735	4979.8		3.2627	315.35		14.487	20610		25.876	28288		29.925	25736		hypothetical protein		Hypothetical proteins
DVU2400	4.3781	1209.9	4				4.5502	863.73	4.33333	14.431	18745	24.5	22.533	17650	36.5	4.4233	3361.3	21.5	hydrogenase, putative		Energy metabolism	Electron transport
DVU2612	3.4096	675.4		2.3635	512.8		2.6541	501.8		14.406	31765		6.1029	8762.9		5.0409	4760.6		conserved hypothetical protein		Hypothetical proteins	Conserved
DVU1005	6.9007	318.12		3.1216	280.55		7.0339	260.68		14.337	11080	7	18.191	8045.7	8	7.4239	7249.4	4	hypothetical protein		Hypothetical proteins
DVU1665	3.0794	342.88		2.4172	275.35		2.0451	261.6		14.326	19823		21.82	20264		50.549	30766		3-dehydroquinate dehydratase, type II (aroQ)	4.2.1.10	Amino acid biosynthesis	Aromatic amino acid family
DVU2951	5.5167	509.4								14.235	4576.3	5.5	18.481	2847.9	13	5.8318	1434.1	2	glutaminyl-tRNA synthetase (glnS)	6.1.1.18	Protein synthesis	tRNA aminoacylation
DVU1818	3.2629	582.37		4.5237	469.65		4.8799	388.72		14.22	8025.3	3.5	13.917	4814.7	12	5.9937	3039.4	4	protein-export membrane protein SecF (secF)		Protein fate	Protein and peptide secretion and trafficking
DVU2153	1.9008	70.05		2.7185	91.275		2.6162	41.025		14.201	164.77		2.8171	219.02		0.92188	172.15		tail fiber protein, putative		Other categories	Prophage functions
DVU2215	8.3678	6422.9	75.3333	5.9726	1496.5	23.6667	7.2945	1037.7	58.3333	14.178	23588	348.5	24.157	24068	370	31.144	21762	339	RNA-binding protein		Unknown function	General
DVU2309	3.8502	420.63		6.5158	551.53		11.467	863.22		14.159	3894	15	14.954	3420.1	9.5	5.3546	2075.1	11	methyl-accepting chemotaxis protein, putative		Cellular processes	Chemotaxis and motility
DVU1191	6.2245	628.77		17.501	576.25		8.6114	479.7		14.068	4424.8	6.5	17.446	3000.8	7	14.051	2315.3	5.5	ATP-dependent protease La, putative		Protein fate	Degradation of proteins, peptides, and glycopeptides
DVU0241	2.9522	858	4	5.4007	1182.4	4.66667	2.146	332.82	1.33333	14.022	12667	71	14.85	8579.6	43.5	6.8047	5169.2	27	MTH1175-like domain family protein		Unknown function	General
DVU2938	5.2804	873.35	7				7.0771	933.08	7	13.955	10087	26	32.874	10009	33	20.27	11014	21.5	conserved hypothetical protein		Hypothetical proteins	Conserved
DVU2771	7.1277	1743.7		4.3254	1208.8		7.1218	1710	1.33333	13.91	25660	15.5	18.211	22788	19	13.708	19654	6.5	conserved hypothetical protein		Hypothetical proteins	Conserved
DVU0264	15.555	2510.8	7.33333				12.15	1931.8	6	13.877	10396	58.5	17.337	8813.3	78.5	7.5017	3829.9	43	ferredoxin, 4Fe-4S, putative		Energy metabolism	Electron transport
DVU1119	1.5128	50.75		3.0377	27.675		1.71	140.25		13.847	78.149		5.236	149.01		2.5408	187.85		virion morphogenesis protein		Other categories	Prophage functions
DVU3103	4.9723	434.97		4.2241	343.45		6.732	298.2		13.741	5044	4.5	20.514	3752.9	14.5	6.3231	2216	5	tolB protein, putative		Transport and binding proteins	Other
DVU1914	1.4723	90		3.6613	165.62		1.6933	92.075		13.74	334.43	4.5	4.9739	430	10.5	5.338	302.45	3.5	2-isopropylmalate synthase/homocitrate synthase family proteins		Unknown function	General
DVU0007				6.9084	869.55	8	7.1489	632.85	10.6667	13.724	9864.5	17	10.968	5104.9	37.5	3.5451	2458.5	14.5	asparaginyl-tRNA synthetase (asnS)	6.1.1.22	Protein synthesis	tRNA aminoacylation
DVU1068	1.9014	142.9		2.2952	142.75		4.2362	211.35		13.669	311.93		3.9187	301.98		5.7648	270.52		branched-chain amino acid ABC transporter, permease proteins		Transport and binding proteins	Amino acids, peptides and amines
DVU2820	1.4793	81.55		2.2762	84.8		2.1065	128.4		13.663	222.36		6.2756	165.9		6.1945	213.85		amidohydrolase family protein		Unknown function	Enzymes of unknown specificity
DVU1305				7.5705	1992.6		3.5639	1171.8	1	13.598	7047	12.5	13.599	5724.3	6.5	11.491	8358.2	10	ribosomal protein L23 (rplW)		Protein synthesis	Ribosomal proteins: synthesis and modification
DVU0794							3.119	381.63	3	13.545	6955.6	16.5	13.979	6301.4	28.5	11.051	5464.2	14	enoyl-(acyl-carrier-protein) reductase (fabI)	1.3.1.9	Fatty acid and phospholipid metabolism	Biosynthesis
DVU3232	0.44352	86.85		2.6042	112.87		3.6078	63.025		13.509	3712.1		14.856	2481.1		3.9204	970.44		flagellar biosynthetic protein FlhA (flhA)		Cellular processes	Chemotaxis and motility
DVU2016	1.8788	169.43		2.6331	143.25		4.9956	350.17		13.483	14948		30.18	11150		5.6991	4604.9		GGDEF domain protein		Unknown function	General
DVU1666	2.2651	214.18		2.824	65.725		2.2478	174.68		13.433	6898.7	6	14.815	6367.6	10	15.831	10836	13	translation elongation factor P (efp)		Protein synthesis	Translation factors
DVU1317	4.7362	1906.5	7							13.421	7966.9	42	10.279	5414.3	96.5	11.461	9096.3	28.5	ribosomal protein S8 (rpsH)		Protein synthesis	Ribosomal proteins: synthesis and modification
DVU1041	2.8633	333.08		2.5105	227.9		2.6072	268.8		13.397	11364		11.434	8858.3		8.1169	6227.5		Sec-independent protein translocase TatC (tatC)		Protein fate	Protein and peptide secretion and trafficking
DVU3284	2.0166	177.15		3.994	164.93		7.5064	172.05		13.393	634.36		11.412	460.5		9.2119	304.41		L-lactate permease		Transport and binding proteins	Carbohydrates, organic alcohols, and acids
DVU1838				2.6183	413.3	1	3.1122	398.77	1.66667	13.322	11140	1.5	11.94	7776	3	4.1495	2509.3	2.5	thioredoxin reductase (trxB-2)	1.6.4.5	Energy metabolism	Electron transport
DVU2231	3.5257	358	1.33333				7.9058	208.65	2	13.307	4993.1	21	36.702	5968.4	31.5	15.322	3509.7	14.5	GTP-binding protein TypA (typA)		Unknown function	General
DVU1196	12.32	593.1	7.66667	9.8808	398.88	3	10.819	455.63	13	13.189	2818.1	20	28.194	2445.2	26.5	20.843	1670.4	10.5	leucyl-tRNA synthetase (leuS)	6.1.1.4	Protein synthesis	tRNA aminoacylation
DVU1444	1.9519	172.93		2.4138	189.07		2.218	189.22		13.169	6967.9	8.5	19.933	8059.8	8	12.899	4324	4.5	basal-body rod modification protein FlgD (flgD)		Cellular processes	Chemotaxis and motility
DVU3168				2.9246	284.7	12	2.7682	173.38	4.33333	13.116	6436.3	34	13.014	4248	37.5	7.5619	2988.2	5.5	glutamate-1-semialdehyde-2,1-aminomutase (hemL)	5.4.3.8	Biosynthesis of cofactors, prosthetic groups, and carriers	Heme, porphyrin, and cobalamin
DVU2804	2.312	227.83		4.1388	228.02		3.1552	129.3		13.096	446.69		6.685	472.16		7.0738	354.88		metallo-beta-lactamase family protein		Unknown function	Enzymes of unknown specificity
DVU1681	2.4201	265.27		2.7423	244.57		3.5546	253.2		13.035	3638.3		16.896	3720		4.0855	1640.3		rod shape-determining protein MreB (mreB-2)		Cell envelope	Biosynthesis of murein sacculus and peptidoglycan
DVU3274	3.4468	582.25		2.4431	370.7		2.3182	220		13.008	14807	6	14.001	11147	11.5	6.388	5055.7	3	hypothetical protein		Hypothetical proteins
DVU1975	11.31	608.8		9.1412	403.6		91.574	649.75		12.99	4326.3	9.5	12.715	3298.6	6.5	5.6884	2354	2	methyl-accepting chemotaxis protein		Cellular processes	Chemotaxis and motility
DVU2019	1.6076	315.35		9.1031	331.15		11.448	452.98		12.967	1867.7		13.769	2282.1		4.0979	646.09		conserved hypothetical protein		Hypothetical proteins	Conserved
DVU0697	4.5305	625.25		4.5877	557.1		5.3218	489.9	2.66667	12.88	4173.5	3	12.647	3269.1	3.5	5.7114	1530.5	3.5	mannose-1-phosphate guanylyltransferase/mannose-6-phosphate isomerases		Cell envelope	Biosynthesis and degradation of surface polysaccharides and lipopolysaccharides
DVU1021				4.3605	409.6	6.33333	5.7867	230.35	9.66667	12.88	4342.2	34.5	16.257	3714.1	38	6.384	1182.6	27.5	conserved hypothetical protein		Hypothetical proteins	Conserved
DVU0061	2.3477	280		3.5468	230.6		2.4603	255.35		12.85	2912.8	2	24.497	2921	4	45.88	5014.3	4	multidrug resistance protein, putative		Cellular processes	Toxin production and resistance
DVU0014	2.1295	223.5		2.3083	382.33		1.9142	315.53		12.843	17726	4.5	18.107	18076	3.5	12.818	13222	1.5	translation initiation factor IF-1 (infA-1)		Protein synthesis	Translation factors
DVU0837	2.023	220.5		2.7404	322.63		2.4895	321.8		12.806	14216	1	11.726	10770	2	7.3831	11261	1	16S rRNA processing protein RimM (rimM)		Transcription	RNA processing
DVU3181	3.5871	199.3					5.7576	188.85	2.33333	12.76	3387.8	23.5	30.244	3159.4	29	10.304	1307.5	15	phosphoribosylformylglycinamidine synthase II (purL)	6.3.5.3	Purines, pyrimidines, nucleosides, and nucleotides	Purine ribonucleotide biosynthesis
DVU0027	4.4644	529.9		3.0668	427.12		6.6293	509.75		12.727	6838.9		8.19	2781.2		4.0785	841.99		membrane protein, putative		Cell envelope	Other
DVU2143	5.7602	1235.5	9.33333	4.018	567.4	6	8.1881	1336.8	9.66667	12.679	4274.7	48	21.008	5309.8	28.5	19.441	5220.3	9	fructose-1,6-bisphosphate aldolase, class II (fba)	4.1.2.13	Energy metabolism	Glycolysis/gluconeogenesis
DVU3071	2.6621	296.92		3.3989	297.9		2.5149	164.1		12.675	3448.3	17.5	15.948	2761.4	39.5	50.861	2275.7	29.5	oxidoreductase, FAD/iron-sulfur cluster-binding domain proteins		Energy metabolism	Electron transport
DVU3245	2.9447	486.92	1.33333	3.5242	360.5					12.634	8220	10	12.901	6546.8	10	16.313	13783	10	transcription elongation factor GreA (greA)		Transcription	Transcription factors
DVU0302	4.2408	721.35		3.2947	556.4		3.6346	704.67		12.563	12275		28.349	22358		37.209	21180		chemotaxis protein CheX, putative		Cellular processes	Chemotaxis and motility
DVU1257	5.9278	2726.9	10.3333	4.1738	978.75	5.33333	4.995	721.63	3.66667	12.555	19891	231.5	15.073	10570	233.5	16.825	15047	311.5	RNA-binding protein		Unknown function	General
DVU1839	5.7358	2289	12.6667	8.8557	2573.1	9.66667	7.5877	3122.6	11	12.51	17578	149	7.0899	7390.6	71	4.0818	3878.7	68.5	thioredoxin (trx)		Energy metabolism	Electron transport
DVU1344	3.0532	330.1	3.33333	3.1067	383.53	3.66667				12.503	7123.7	26	11.609	4430.5	9.5	6.0264	2958.9	7	1-hydroxy-2-methyl-2-(E)-butenyl 4-diphosphate synthase (ispG)s		Biosynthesis of cofactors, prosthetic groups, and carriers	Other
DVU1324	9.1826	2954.3		5.0038	1197		7.3932	945.77		12.437	6031.9	1.5	14.01	4440.7	5	12.395	7168.4	3	methionine aminopeptidase, type I (map)	3.4.11.18	Protein fate	Protein modification and repair
DVU0779	6.5528	2505.4		3.3028	497.75		5.0837	1397.1		12.358	5359	2	8.9538	2219.4	2	9.7668	5263.2	2.5	ATP synthase F0, B subunit, putative		Energy metabolism	ATP-proton motive force interconversion
DVU0773	3.3257	1706.3		3.373	1182.1		4.0196	1693.6		12.266	32529	9.5	12.188	22917	9.5	12.012	16890	11.5	hypothetical protein		Hypothetical proteins
DVU0003	2.106	387.63		5.1233	206.43		6.1277	148.45		12.26	2897.8	29	19.01	2990.4	30.5	22.564	2764.7	24.5	DNA gyrase, B subunit (gyrB)	5.99.1.3	DNA metabolism	DNA replication, recombination, and repair
DVU1375	4.4844	2031.2	4.66667				3.8458	1626.3	5.66667	12.224	7198.7	4.5	9.4761	6027.1	7	4.1804	2520.4	4.5	hypothetical protein		Hypothetical proteins
DVU0682	5.5906	1800.4	1.33333				6.5663	971.23	2.66667	12.212	15129	33.5	17.133	13922	45	11.934	10143	46	DNA-binding protein, putative		Unknown function	General
DVU1077	17.754	835.3		6.0945	418		6.8303	412.48		12.208	4555.8	31	32.859	5703.1	31	23.793	3785.7	20	inner membrane protein, 60 kDa		Cell envelope	Other
DVU1209	2.5405	548		2.2859	445.08		2.4173	450.7		12.134	33536		18.048	25563					ribosomal protein L32 (rpmF)		Protein synthesis	Ribosomal proteins: synthesis and modification
DVU3101	9.4813	469.68		10.088	476.1		3.9414	324.88		12.129	2870.5		19.881	2852.6		12.13	1414.3		tonB protein, putative		Transport and binding proteins	Cations
DVU1949	3.0126	359.83		3.3714	225.07		3.3869	317.7		12.109	3928.8	5.5	14.601	2792.6	11.5	6.0196	2863.5	3	nif-specific regulatory protein (nifA-1)		Central intermediary metabolism	Nitrogen fixation
DVU0237				4.1148	361.58	1.66667	4.5391	434.2		12.073	5712.1	9.5	20.854	6266.2	7.5	6.8081	3926.2	8.5	seryl-tRNA synthetase (serS)	6.1.1.11	Protein synthesis	tRNA aminoacylation
DVU1032	3.5762	978.55		3.31	899.3		3.6342	1026.4		12.054	26882	20	15.974	20405	20	16.826	19906	16	hypothetical protein		Hypothetical proteins
DVU2427	3.2463	1036.7	3.66667	4.3052	988.38	5	5.5036	1235.2	3	12.036	19051	30	14.433	14473	26.5	11.066	10072	28	hypothetical protein		Hypothetical proteins
DVU3035	5.0622	353.4		5.9448	516.23		4.6335	422.6		11.957	3597.3	15.5	15.902	3332.1	26.5	5.2033	1129.2	13.5	methyl-accepting chemotaxis protein, putative		Cellular processes	Chemotaxis and motility
DVU0936	2.8559	720.07		2.0393	310.12		2.4164	395.98		11.912	14636		12.459	13275		7.6536	10027		hypothetical protein		Hypothetical proteins
DVU3088	4.3417	271.07		2.8531	94.7		2.5225	112.9		11.869	5989	15.5	26.136	6885.1	22.5	5.2235	4227.4	6	ATP-dependent RNA helicase, DEAD/DEAH box family		Transcription	Other
DVU1651	4.5377	1162		2.6899	636.2		3.3184	925.5		11.856	10048		8.1336	5355.4		3.415	2145.1		conserved hypothetical protein		Hypothetical proteins	Conserved
DVU2289	3.9192	823.18		2.139	553.33		2.3627	319.8		11.841	11260	6	11.101	8569.6	8	8.0987	5332.8	7	hydrogenase, CooX subunit, putative		Energy metabolism	Electron transport
DVU2290	2.8418	703.22	3	2.104	316.45	3				11.815	15402	10	9.6409	12700	19.5	6.3551	6905.5	7.5	hydrogenase, CooU subunit, putative		Energy metabolism	Electron transport
DVU1788	1.071	361.07		10.968	364.37		7.1368	260.18		11.795	2924.9	9.5	17.721	2313.1	8	22.425	2090.6	4.5	RNA polymerase sigma-70 factor (rpoD)		Transcription	Transcription factors
DVU2608	3.7803	401.07		3.1273	443.03		3.1147	335.17		11.74	6325.9	1.5	14.406	6035	2	7.1046	3707.7	1	chemotaxis protein MotA (motA-3)		Cellular processes	Chemotaxis and motility
DVU1458	4.8473	810.65	4				5.6469	1290.8	8.33333	11.709	6536.7	10.5	13.767	8002.4	12	4.5414	2519.5	5	chemotaxis protein CheZ, putative		Cellular processes	Chemotaxis and motility
DVU1470	2.8074	1203.2	5.66667	4.4769	1155	4.33333				11.708	11772	73.5	9.816	10493	70.5	8.0302	8141.9	94.5	peptidyl-prolyl cis-trans isomerase C (ppiC)	5.2.1.8	Protein fate	Protein folding and stabilization
DVU1316	3.5867	2172.3		3.6717	1229.8		2.8944	998.35		11.674	19027		8.3803	9346.7		15.756	18260		ribosomal protein S14 (rpsN)		Protein synthesis	Ribosomal proteins: synthesis and modification
DVU0891	4.1695	366.2	3.33333							11.656	6624	64.5	16.077	4177.8	47.5	7.5451	2428.7	44.5	aminotransferase, classes I and II		Unknown function	Enzymes of unknown specificity
DVU1258	3.8467	501.05		7.7676	273.8	2.66667	13.775	470.55	3.33333	11.586	1663.4	12.5	9.1241	1202.2	23.5	8.2732	966.06	9	glutamine synthetase, type III (glnN)	6.3.1.2	Amino acid biosynthesis	Glutamate family
DVU3347	2.2242	213.82	1.33333	2.3391	196.32		1.6381	146.47	2	11.575	9570.5	51.5	8.5972	6411.2	26.5	8.1428	3950.3	35	pyruvate ferredoxin/flavodoxin oxidoreductase family proteins		Energy metabolism	Fermentation
DVU1311	3.2243	1745.3	1	4.1023	1017.8		2.7191	651.2	2.66667	11.53	11955	30	6.2627	6639.8	77	11.534	12604	34	ribosomal protein L29 (rpmC)		Protein synthesis	Ribosomal proteins: synthesis and modification
DVU2216	4.8491	2406.9		2.3541	517.17		2.8858	621.63		11.52	13052	1.5	26.864	35020	1.5	24.355	26306	2.5	translation initiation factor IF-1 (infA-2)		Protein synthesis	Translation factors
DVU0812	3.1018	448.05	1.33333	3.3518	447.5		3.1677	360.25	1	11.518	5461.6	14.5	8.3915	3369	6.5	3.557	1309.1	15	heat shock protein GrpE (grpE)		Protein fate	Protein folding and stabilization
DVU2051	10.036	472.77		5.7877	316.65		74.418	547.2		11.388	4957		28.025	3947.5		7.8971	3912.2		hypothetical protein		Hypothetical proteins
DVU2298	3.1374	382.9		2.6394	196.17		4.1631	184.17		11.364	16491	1	13.505	16692	14.5	32.144	37542	1.5	glycine/betaine/L-proline ABC transporter, permease proteins		Transport and binding proteins	Amino acids, peptides and amines
DVU0703	2.139	364.75		5.888	271.5		5.0308	237.7		11.354	1477.4	4	15.573	1436	8	11.349	1453.2	3	GTP-binding protein LepA (lepA)		Unknown function	General
DVU0041	6.7129	428.77		4.2676	350.28		5.1042	239.77		11.333	5242.1		19.48	4245.4		6.1625	1460.7		transglycosylase, SLT family		Cell envelope	Biosynthesis and degradation of surface polysaccharides and lipopolysaccharides
DVU0339	4.4702	409.27	8				5.4329	287.35	6.33333	11.32	4061.2	20	14.267	2954.8	13.5	4.2441	1402.4	15	D-isomer specific 2-hydroxyacid dehydrogenase family proteins		Unknown function	Enzymes of unknown specificity
DVU0608	7.6133	492.2		5.0152	437.52		7.04	891.22		11.309	2259.7	14	17.992	3645.1	9	3.8349	902.35	2.5	methyl-accepting chemotaxis protein		Cellular processes	Chemotaxis and motility
DVU2664	2.0701	175.28		2.2872	168.05		2.1753	115.02		11.305	363.43		4.3991	417.91		3.6669	343.63		phosphate ABC transporter, ATP-binding protein (pstB-2)s		Transport and binding proteins	Anions
DVU1290	12.377	1914.3		3.1311	517.15		8.3109	1144.6		11.277	11579	12	10.95	5236.7	30.5	7.9569	3975.1	6.5	nitrate reductase, gamma subunit, putative		Energy metabolism	Anaerobic
DVU0353	8.0162	1039.3	4.66667				5.8961	540.92	3.33333	11.265	6784	14.5	10.949	3916	59	8.3563	2761.6	14.5	alcohol dehydrogenase, iron-containing		Energy metabolism	Fermentation
DVU2578	2.285	193.03		2.4666	279.82		3.8203	260.22		11.26	200.5		7.1291	259.84		4.7809	259.98		response regulator		Regulatory functions	Protein interactions
DVU0284	2.4141	269.48	2.66667	2.6476	256.32	1.33333				11.253	10590	4.5	7.8303	6295.7	6.5	3.6943	2230.7	1	peptidyl-prolyl cis-trans isomerase B (ppiB-1)	5.2.1.8	Protein fate	Protein folding and stabilization
DVU0462	2.527	235.7		2.253	217.15		1.6256	114.43		11.243	9550.9	22.5	8.0816	4968.4	47.5	31.464	16947	24.5	chorismate mutase/prephenate dehydratase		Amino acid biosynthesis	Aromatic amino acid family
DVU0705	1.3197	164.25		2.9563	100.37		5.516	201.22		11.228	608.73		6.5313	607.53		2.7648	405.46		TRAP dicarboxylate transporter, putative		Transport and binding proteins	Carbohydrates, organic alcohols, and acids
DVU0907	5.4454	137.03		6.1675	85.85		19.01	186.75		11.219	2102.2		17.032	2932.2		140.89	1811.2		conserved domain protein		Hypothetical proteins	Domain
DVU2940	2.4549	438.5		2.4485	342.33		2.0205	315.25		11.215	7755.2		6.6635	3997.8		5.5251	4199		hypothetical protein		Hypothetical proteins
DVU3134	13.216	1314.8	8.33333	6.6007	606.37	20.6667	22.127	2544.3	14	11.214	2293.7	3.5	17.401	1961.7	6	6.028	934.42	2	glycerol kinase (glpK)	2.7.1.30	Energy metabolism	Other
DVU1313	8.2952	3419		7.774	2003.4		4.7979	1519.4		11.213	5748.5	123.5	11.437	4396.4	124	13.904	8197.1	135.5	ribosomal protein L14 (rplN)		Protein synthesis	Ribosomal proteins: synthesis and modification
DVU2025	1.89	221.9		14.633	282.9		14.92	477.08		11.207	1778.3		6.6437	1433.4		15.948	880.89		conserved hypothetical protein		Hypothetical proteins	Conserved
DVU3242	2.5423	583.35		3.3202	604.75		2.6203	579.35		11.196	18055	6.5	15.203	22078	8	14.82	17416	1.5	DNA-directed RNA polymerase, omega subunit (rpoZ)	2.7.7.6	Transcription	DNA-dependent RNA polymerase
DVU3199	2.6615	419.97	6	2.0849	383.55	6.33333	2.0126	323.08	2.33333	11.181	14607	12	5.789	7193.5	8.5	4.5632	4531.4	20.5	conserved hypothetical protein TIGR00103		Hypothetical proteins	Conserved
DVU3271	35.793	8217.8		12.154	2295.1		11.379	6954		11.179	8751.3	58.5	14.665	6507.3	64.5	3.1938	1967.3	34	cytochrome d ubiquinol oxidase, subunit I (cydA)	1.10.3.-	Energy metabolism	Electron transport
DVU1323	10.147	2072		9.824	1097		12.747	1062.3		11.15	5658.6	4	11.559	2652.1	20	17.075	5524.1	2	preprotein translocase, SecY subunit (secY)		Protein fate	Protein and peptide secretion and trafficking
DVU1283							3.4044	447	3.33333	11.143	6188	13.5	12.992	4450.3	14	4.28	1808.1	7	UTP-glucose-1-phosphate uridylyltransferase (galU)	2.7.7.9	Cell envelope	Biosynthesis and degradation of surface polysaccharides and lipopolysaccharides
DVU0318	3.0413	509.4		3.6056	468.12		2.8285	517.88		11.079	32355	26.5	20.867	31517	25.5	34.314	31181	10.5	TPR domain protein		Unknown function	General
DVU3227	3.0924	413.63		3.3067	393.63		2.6171	352.55		11.077	4057.8		12.189	3688.8		4.2071	1845.6		flagellar basal body-associated protein, putative		Cellular processes	Chemotaxis and motility
DVU2770	5.258	3725.4		8.0874	2214.6		5.7803	4970.4		11.021	19120		14.869	27521		10.397	14258		response regulator		Regulatory functions	Protein interactions
DVU1427	2.8136	898.18		4.2071	882.6		3.8976	1130.9	3.33333	10.974	15140	9	10.463	12191	5.5	11.824	13048	8	response regulator		Regulatory functions	Protein interactions
DVUA0019	27.641	543.5		46.828	315.02		168.73	1039.4		10.971	6707.3		32.997	5651.1		18.054	7842.2		type II DNA modification methyltransferase, putative		DNA metabolism	Restriction/modification
DVU2637	3.0604	261.98		3.4557	305.8		5.9651	245.95		10.889	317.42		4.8575	296.55		5.1103	271.34		HAMP domain protein		Unknown function	General
DVU1445	2.0012	147.38		3.409	229.2		3.6497	136.85		10.887	3230	10.5	9.3473	2370	12	3.4538	1186	4.5	flagellar hook-length control domain protein		Cellular processes	Chemotaxis and motility
DVU3117	5.2448	3323.5		7.6875	2132.9		5.7288	2347.6		10.837	21239	7	16.54	18395	13.5	21.463	22204	22	hypothetical protein		Hypothetical proteins
DVU0959	0.8926	101.33		2.6783	116.65		3.6121	202.1		10.833	4144.7	1	23.151	6060	1	19.125	8167.8	3.5	replicative DNA helicase (dnaB)	3.6.1.-	DNA metabolism	DNA replication, recombination, and repair
DVU2563	9.7696	312.85		2.7214	315.35		5.7828	229.93		10.821	350.42		4.1933	388.53		3.7534	296.88		beta-ketoacyl synthase, putative		Unknown function	Enzymes of unknown specificity
DVU1163	0.48909	67.5		2.2145	122.63		5.3375	186.3		10.818	456.63		3.5444	526.64		2.655	393.37		major facilitator superfamily protein		Transport and binding proteins	Unknown substrate
DVU0916	2.5695	793.05		3.6423	489.75		2.7056	546.83		10.81	11986		18.944	17985		17.374	13514		AT-rich DNA-binding protein		Unknown function	General
DVU0349	5.0915	868.43	2	5.684	767.23	1	4.4227	712.25	4.66667	10.806	3148.2	6	13.215	2574.7	12	4.2265	1207	10	NeuB family protein		Cell envelope	Biosynthesis and degradation of surface polysaccharides and lipopolysaccharides
DVU1812	4.423	304.57		2.7154	215.7		4.6302	335.7		10.806	4344.3		12.5	3147.7		3.1939	1223.2		cytochrome c oxidase, subunit II, putative		Energy metabolism	Electron transport
DVU2577	3.1681	494.53		4.1616	518.77		2.8069	323.17		10.799	7971.4	2	16.818	10579	1.5	11.383	11398	2	DNA-binding response regulator, LuxR family		Regulatory functions	DNA interactions
DVU1629	4.0214	1383.9		10.164	2192.4		5.6003	2584		10.757	5829.9	14.5	11.618	5260.4	14	8.319	4994.1	11	ribosomal subunit interface protein (yfiA)		Protein synthesis	Translation factors
DVU0845	2.1878	439.38		1.8852	243.45		2.7612	539.05		10.75	27890		7.7422	13626		18.253	24291		hypothetical protein		Hypothetical proteins
DVU3206	6.4053	256.17	3.33333	3.8882	191.02	2.33333	5.3437	164.28	1.66667	10.738	4452.4	29	22.881	4672.8	28.5	12.933	4087.9	34.5	phosphoribosylaminoimidazolecarboxamide formyltransferase, putatives		Purines, pyrimidines, nucleosides, and nucleotides	Purine ribonucleotide biosynthesis
DVU2222				2.1862	336.4		2.6164	406.65	1.33333	10.725	12252	3.5	9.831	9604.7	6.5	11.5	7484.8	3	single-strand binding protein (ssb)		DNA metabolism	DNA replication, recombination, and repair
DVU1325	4.5647	4175.7		5.428	2136.7		3.4016	1528.4		10.666	22485		10.163	15650		15.787	21742		ribosomal protein L36 (rpmJ)		Protein synthesis	Ribosomal proteins: synthesis and modification
DVU2922	3.5938	1664.8		3.2885	872		2.2001	597.7		10.666	11319	1	8.753	9570.2	3	9.6955	11669	1	preprotein translocase, SecE subunit (secE)		Protein fate	Protein and peptide secretion and trafficking
DVU1211	3.4923	1056.7		3.7095	1130.8	1.33333				10.595	8561.2	2	10.294	6108.3	11	8.8627	6981.6	5	ribosomal protein L28 (rpmB)		Protein synthesis	Ribosomal proteins: synthesis and modification
DVU1327	5.5418	3113.2	6	8.5797	1609.3	5.33333	5.3004	1067	5.66667	10.587	7197.2	61	10.352	5817.2	76.5	14.281	8896.8	66.5	ribosomal protein S11 (rpsK)		Protein synthesis	Ribosomal proteins: synthesis and modification
DVU1301	5.1511	4221.4		5.2815	2165.9		4.1929	2424.7		10.533	24436		11.905	20556		18.703	32360		hypothetical protein		Hypothetical proteins
DVU1794	3.6175	1420.6		2.3895	706.33		3.4061	1267.7		10.501	19199		5.3525	7377.8		9.129	10521		hypothetical protein		Hypothetical proteins
DVU1406	2.8533	295.87					4.7832	383.77	1.33333	10.471	7269.5	28.5	11.81	4219.6	31	3.9604	1709.4	12.5	phosphoribosylformylglycinamidine cyclo-ligase (purM)	6.3.3.1	Purines, pyrimidines, nucleosides, and nucleotides	Purine ribonucleotide biosynthesis
DVU2114	0.89367	78.8		3.301	121.62		2.9902	79.5		10.41	7221.8		15.981	6538		4.6926	3898		sigma-54 dependent transcriptional regulator/response regulators		Regulatory functions	DNA interactions
DVU0396	5.0935	2849		8.1918	1982.2	1	6.2985	2785		10.398	6535.7	6	10.229	6486	16.5	7.9878	4958.7	5	DNA-binding protein HU (hup-1)		DNA metabolism	Chromosome-associated proteins
DVU1172	1.6279	71.525		1.811	125.62		1.774	317.68		10.349	30300		5.6381	10364		7.4832	11316		hypothetical protein		Hypothetical proteins
DVU2529	5.23	346.2		3.3816	372.02	2.66667	8.9948	497.4		10.338	2573	35	16.641	2732	39.5	7.4956	2318.8	23.5	phosphoglycerate kinase (pgk)	2.7.2.3	Energy metabolism	Glycolysis/gluconeogenesis
DVU2371	4.5551	366.33		4.0407	309.58		3.6232	207.5		10.333	4761.5		18.224	4348.8		5.1829	2672.8		N-acetylmuramoyl-L-alanine amidase, putative		Cell envelope	Biosynthesis and degradation of surface polysaccharides and lipopolysaccharides
DVU2401	6.4775	1248.2	21				6.797	1502.4	18	10.311	11798	24.5	18.536	10473	50.5	4.0094	2725.3	22	hydrogenase, iron-sulfur cluster-binding subunit, putatives		Energy metabolism	Electron transport
DVU0373	1.2786	222.2		4.1102	210.7		4.547	304.2		10.304	799.12		10.472	829.76		7.5028	580.07		CoA-binding domain protein		Unknown function	General
DVU1873	6.6759	1701.1	6	7.4692	1607.6	4	4.9793	735.57	5.66667	10.286	4944	48	14.068	4406.9	36.5	10.754	4948.4	38	peptidyl-prolyl cis-trans isomerase B (ppiB-2)	5.2.1.8	Protein fate	Protein folding and stabilization
DVUA0006	3.1619	793.87		3.4934	475.05		4.4678	881.35		10.246	18005		17.023	15993		9.0144	17433		magnesium transporter MgtE, putative		Transport and binding proteins	Cations
DVU0344	7.8385	275.3		3.037	227.07		5.2119	193.75		10.236	4237.8	14.5	19.942	4295	13.5	2.9532	1270.9	7.5	methyl-accepting chemotaxis protein		Cellular processes	Chemotaxis and motility
DVU1430	14.155	526.2	14.3333	14.498	591.68	12.6667	10.339	224.52	11.3333	10.23	3179.6	8.5	11.678	1544.3	16.5	4.7875	1280.5	4.5	peptidase, M16 family		Protein fate	Degradation of proteins, peptides, and glycopeptides
DVU2470	7.7236	1531.2		10.179	2329.2		4.8953	1251.1		10.219	12770		9.4422	9354.8		7.8911	6025.3		membrane protein, putaive		Cell envelope	Other
DVUA0020	4.6536	450.55		3.5101	341.32		25.201	685.85		10.181	8030.9	2.5	12.798	5123.7	2	7.456	5781.4	2	type II restriction endonuclease, putative		DNA metabolism	Restriction/modification
DVU1336	1.7209	247.38		4.5021	245.22		3.6214	100.2		10.174	2292.6	23	18.512	2194.6	37.5	12.674	2618.3	17.5	ATP-dependent Clp protease, ATP-binding subunit ClpX (clpX)s		Protein fate	Degradation of proteins, peptides, and glycopeptides
DVU1769				10.275	764.75	10	19.302	1269.3	34.3333	10.174	2225.5		20.651	2315.9		5.7362	819.3		periplasmic [Fe] hydrogenase, large subunit (hydA)	1.18.99.1	Energy metabolism	Electron transport
DVU2965	4.7155	2948.9		4.1095	1522.1		5.1221	2572.3		10.168	16023		11.629	18164		11.263	14517		hypothetical protein		Hypothetical proteins
DVU1374	5.0598	2375.8		6.9679	2563.7		3.64	1275.5		10.126	20199		7.9653	11854		5.7271	6758		conserved hypothetical protein		Hypothetical proteins	Conserved
DVU0994	2.1623	386.7		2.0411	452.7		1.858	223.68		10.124	17354		6.0112	8606		6.9307	6083.5		hypothetical protein		Hypothetical proteins
DVU1880	2.6885	268.85		2.5408	256.38		2.8512	336.88		10.091	7550.8	2	10.414	5608.6	2	4.0257	2811.2	1	hypothetical protein		Hypothetical proteins
DVU0732	5.2498	385.25	5.33333	7.3194	318.4	4.33333	6.8724	254.25	5.66667	10.033	6251.3	20	14.122	3951.6	26	12.202	2709.1	16.5	valyl-tRNA synthetase (valS)	6.1.1.9	Protein synthesis	tRNA aminoacylation
DVU2483	10.239	456.23		3.2368	284.22		7.3592	490.33		9.9899	4033.4	2	14.259	2899.1	4.5	3.4429	1449.9	3	cytochrome c family protein		Energy metabolism	Electron transport
DVU1843										9.9849	7361.6		7.2443	5460.6		3.3956	2701.2		hypothetical protein		Hypothetical proteins
DVU3208	5.6816	540.58		3.112	370.1		3.1064	287.8		9.9647	3363.5		12.178	2438.8		3.3714	1671.3		membrane protein, putative		Cell envelope	Other
DVU3016	1.2086	173		3.0291	200.92		16.366	473.58		9.9644	2694.1		14.143	1892.8		4.1425	707.3		B12 binding domain protein/radical SAM domain protein		Unknown function	General
DVU2459	2.8805	463.6		2.7387	445.82		2.0509	388.15		9.9415	6613.9		8.2649	5262.5		4.4448	2774.5		hypothetical protein		Hypothetical proteins
DVU1913							6.3632	390.4	3	9.8709	4341.9	35.5	10.444	2667.3	27	5.3612	1382.2	14	aspartate kinase, monofunctional class	2.7.2.4	Amino acid biosynthesis	Aspartate family
DVU2696	1.3759	40.05		2.2497	108.5		1.3451	134.95		9.8583	15044		4.363	4199.1		6.2505	8516.5		conserved hypothetical protein		Hypothetical proteins	Conserved
DVU1345				3.5619	101.68	3.33333				9.7802	3795.3	14	15.731	2998.4	28	11.222	2930.2	25	prolyl-tRNA synthetase (proS)	6.1.1.15	Protein synthesis	tRNA aminoacylation
DVU0675	3.4711	415.52	9	3.5428	400.98	10.3333	2.6115	439.75	8.33333	9.7663	436.82	33	6.5429	423.55	46	3.1815	486.37	7.5	amino acid ABC transporter, periplasmic amino acid-binding proteins		Transport and binding proteins	Amino acids, peptides and amines
DVU0477	2.6398	215.85	1.33333	2.8998	106.3		2.9698	146.58		9.7434	4298.1	24.5	9.0791	1336.9	29	5.7327	3685.5	8	isocitrate dehydrogenase, NADP-dependent (icd)	1.1.1.42	Energy metabolism	TCA cycle
DVU0693	4.3051	786.98		2.4035	151.58		2.9812	466.05		9.7366	5102.7	13.5	9.2594	2578.4	20	9.4684	3336.4	19.5	molybdopterin oxidoreductase, iron-sulfur cluster-binding subunit,sputative		Energy metabolism	Electron transport
DVU0320	1.9833	176.95		1.9597	187.1		1.8329	258.5		9.7224	19734		5.447	9787.3		3.6005	3152.4		conserved hypothetical protein		Hypothetical proteins	Conserved
DVU0825	1.9147	283.52	1.33333	12.706	360.7		4.6738	256.85		9.6987	2967.1	36	13.574	2173.1	33.5	18.108	1303.8	24.5	preprotein translocase, SecA subunit (secA)		Protein fate	Protein and peptide secretion and trafficking
DVU1308	5.2133	2356.2	3	4.4863	1268.2	3.33333	3.0472	752.55	3.33333	9.6692	10134	179	9.4606	7918.1	58.5	12.118	11135	81	ribosomal protein L22 (rplV)		Protein synthesis	Ribosomal proteins: synthesis and modification
DVU1461	3.7714	433.43		3.7373	487.45		2.3201	254.28		9.6658	4821.1	3	9.3694	2987.3	3	4.3972	1758.8	2.5	glutamyl-tRNA reductase (hemA)	1.2.1.-	Biosynthesis of cofactors, prosthetic groups, and carriers	Heme, porphyrin, and cobalamin
DVU2917	9.628	1728.1		3.5789	585.38		7.8241	4112.6		9.6535	7508.1		9.0173	6848.9		8.4528	7357.9		UDP-3-0-acyl N-acetylglucosamine deacetylase (lpxC)	3.5.1.-	Cell envelope	Biosynthesis and degradation of surface polysaccharides and lipopolysaccharides
DVU0162	3.607	531.57		9.8096	261.68		15.512	383.15		9.6448	5272.9	8.5	32.127	5099.9	13.5	29.852	4219.2	24	carbamoyl-phosphate synthase, large subunit (carB)	6.3.5.5	Purines, pyrimidines, nucleosides, and nucleotides	Pyrimidine ribonucleotide biosynthesis
DVU2794	3.2546	706.88		3.0906	460.43		3.4124	460.95		9.6445	5492.8	4.5	8.1235	3428.4	6	2.6854	763.39	5	electron transport complex protein RnfG, putative		Energy metabolism	Electron transport
DVU1315	11.843	3256	9.33333				4.9593	1587.8	2.66667	9.6098	4411	132	13.727	4555.8	128	11.128	7580.1	41	ribosomal protein L5 (rplE)		Protein synthesis	Ribosomal proteins: synthesis and modification
DVU1040	3.8952	820.65		3.7243	598.97		3.6858	650.23		9.5839	12103		6.7475	5750.4		4.0692	2743.9		imidazoleglycerol-phosphate dehydratase (hisB)	4.2.1.19	Amino acid biosynthesis	Histidine family
DVU1968	0.88296	129.22		5.5007	230.38		6.0355	249		9.5748	446.33		8.069	404.06		7.6892	479.16		oxidoreductase, putative		Unknown function	Enzymes of unknown specificity
DVU1045	3.5652	835.83		2.6179	466.65		2.3298	471.05		9.5302	11067	6.5	6.7951	6695.3	21	6.1625	4187.3	8	hypothetical protein		Hypothetical proteins
DVU1423	2.7836	162.78		2.4099	154.95		2.3973	121.78	1	9.5214	10088	2	13.719	9074	1.5	2.3252	3942.8	1	2-oxoglutarate dehydrogenase, E3 component, lipoamide dehydrogenases(lpdA)	1.8.1.4	Energy metabolism	TCA cycle
DVU0883	2.6993	766.27		2.5507	489.23		2.9863	612.63		9.5109	6185.5	5.5	7.6951	5058.1	1	5.9773	3697.8	3	glutaredoxin, putative		Energy metabolism	Electron transport
DVU0774	4.8523	2043.7		2.3243	336.55		4.1358	1113.4		9.5102	6724.8	60.5	8.0378	4579.6	25	15.329	12816	50	ATP synthase, F1 epsilon subunit (atpC)	3.6.3.14	Energy metabolism	ATP-proton motive force interconversion
DVU0012	1.9237	82		2.7544	59.45		2.6631	58.75		9.4828	2988.3		9.3891	2410.9		4.6724	2378.8		hypothetical protein		Hypothetical proteins
DVU0437	4.8821	222.1		3.1676	115.98		4.076	129.1		9.4776	873.99	2	6.0478	829.36	4	1.9767	454.21	1.5	efflux transporter, RND family, MFP subunit		Transport and binding proteins	Unknown substrate
DVU0460				2.9257	425.05	3				9.4744	10443	73	10.099	5701.7	83.5	29.418	16019	73	predicted phospho-2-dehydro-3-deoxyheptonate aldolases	4.2.1.-	Amino acid biosynthesis	Aromatic amino acid family
DVU1247	2.7838	229.38		3.1449	115.12		2.2367	313.45		9.4711	3372.5		13.019	3349.7		6.6571	3336.2		hypothetical protein		Hypothetical proteins
DVU1623	11.256	1294.1	7.66667	9.3274	688.95	5.66667	11.435	838.4	10.6667	9.4546	2802.4	47	16.078	2499.1	36	9.9657	1769	49	CTP synthase (pyrG)	6.3.4.2	Purines, pyrimidines, nucleosides, and nucleotides	Pyrimidine ribonucleotide biosynthesis
DVU3167				2.5591	356.3					9.4478	9613.1	7	7.8985	5419.4	13.5	5.4414	2559.7	3.5	heme biosynthesis protein, putative		Biosynthesis of cofactors, prosthetic groups, and carriers	Heme, porphyrin, and cobalamin
DVU3273	3.2357	1099.3		3.74	828.65		2.7429	582.85		9.4438	6857.4		9.1487	5180.2		4.8392	2396.8		conserved hypothetical protein		Hypothetical proteins	Conserved
DVU0019	6.5737	2162.5	9.33333	6.1548	1357.1	6.66667	7.0447	2456.9	6.66667	9.4148	5763	16	16.51	8270.3	10	4.2731	3089.6	18	nigerythrin (ngr)		Energy metabolism	Electron transport
DVU1854	1.5778	77.4		2.3364	172.02		2.3079	224.63		9.4065	10408		7.5546	9301.9		6.7063	5116.5		hypothetical protein		Hypothetical proteins
DVU1703	3.0323	230.43		29.062	350.23		10.87	409.7		9.3965	1142.6		1.9305	906.31		2.6947	628.53		type I restriction-modification enzyme, R subunit		DNA metabolism	Restriction/modification
DVUA0085	0.39395	107.6		6.51	214.8		213.99	279.65		9.396	2503.3		7.9723	2124.7		20.02	1449.8		conserved hypothetical protein		Hypothetical proteins	Conserved
DVU3368	3.173	333.08		3.982	374.7		4.5168	386.13		9.3753	5305.7	11	11.564	4140.7	3.5	9.3831	4335.9	3	histidyl-tRNA synthetase (hisS)	6.1.1.21	Protein synthesis	tRNA aminoacylation
DVU1376										9.3732	7233.9		15.529	5468.1		4.592	2317.2		acetolactate synthase, large subunit, biosynthetic type (ilvB-2)s	4.1.3.18	Amino acid biosynthesis	Pyruvate family
DVU0064	3.7176	964.22		3.3167	374.37		6.1794	515.75		9.361	11217	16	11.487	8003.8	24	19.696	9156.5	29.5	hypothetical protein		Hypothetical proteins
DVU2647	1.9073	102.53		2.2653	108.27		1.7296	162.9		9.3605	321.91		5.9	273.16		2.8383	574.11		endoribonuclease, L-PSP family		Transcription	Degradation of RNA
DVU1671	0.73745	203.05		3.9342	183.22		15.396	339		9.3382	1984.7	3	16.303	2050	1.5	6.4252	865.47	1	ABC transporter, ATP-binding protein/permease protein		Transport and binding proteins	Unknown substrate
DVU2292	2.5452	984.28		2.9489	753.08		1.7333	224.85		9.3282	15983	1	7.5315	12190	1	4.8699	6632.7	3.5	hydrogenase nickel insertion protein HypA (hypA)		Protein fate	Protein modification and repair
DVU0817	2.9522	538.52		2.2182	391.05	1	2.0955	261.5		9.3263	11317	3	15.716	17251	2	4.4381	5910.9	2	hypothetical protein		Hypothetical proteins
DVU2621	2.4094	148.15		3.5586	455.87		5.8824	275.23		9.3098	3245.8		11.962	2948.9		5.3027	1760.3		hypothetical protein		Hypothetical proteins
DVU0518	2.2246	254.85		1.9997	171.02		1.3701	140.52		9.3084	14487	3.5	4.8949	7380.1	7.5	3.1294	3633.3	2.5	hypothetical protein		Hypothetical proteins
DVU2753	3.7855	324.85		2.4567	307.63	1.33333				9.3079	470.4		5.2038	417.87		3.1731	394.76		C_GCAxxG_C_C family protein		Unknown function	Enzymes of unknown specificity
DVU1869	7.0204	380.5		10.27	368.12		11.09	518.75		9.3032	1786.3	12	9.3445	1899	7.5	2.9305	957.43	4.5	methyl-accepting chemotaxis protein		Cellular processes	Chemotaxis and motility
DVU3162	28.25	1178.8	24	14.011	553.2	14.3333	19.992	808.42	19.6667	9.2982	1221.3	109.5	11.859	601.18	82.5	4.5998	514.71	15.5	ABC transporter, periplasmic substrate-binding protein		Transport and binding proteins	Unknown substrate
DVU2218	1.9324	129.03		2.6673	164.87		3.8436	161.2		9.2842	459.44		5.7044	389.11		4.2238	456.25		GTP-binding protein, putative		Unknown function	General
DVU3319							10.032	485.2	5.33333	9.2813	5091.6	16	15.244	3912.3	79.5	18.48	1331.3	12.5	proline dehydrogenase/delta-1-pyrroline-5-carboxylate dehydrogenases(putA)	1.5.1.12	Energy metabolism	Amino acids and amines
DVU1544	4.8284	496.5		6.5168	347.9		4.3692	322.8		9.2768	4682.9		18.984	3965.5		5.4372	1565.3		mechanosensitive ion channel family protein		Transport and binding proteins	Unknown substrate
DVU0624	7.9408	3197.2		3.605	966.97		5.6111	3276.2		9.2698	12395		13.369	14090		5.8475	4814.7		NapC/NirT cytochrome c family protein		Energy metabolism	Electron transport
DVU2966	4.3878	1358.8	2.33333				5.3976	1065.2	6.33333	9.255	5894.6	32	10.219	5600.6	25.5	6.6031	5147.1	19.5	response regulator		Regulatory functions	Protein interactions
DVU2981										9.2269	2816.3	41.5	8.6183	1570.6	69.5	11.884	2914.7	64.5	2-isopropylmalate synthase (leuA)	4.1.3.12	Amino acid biosynthesis	Pyruvate family
DVU1152	1.6701	75.575		2.1112	144.5		2.6515	173.78		9.2161	138.57		4.2534	134.2		3.9722	219.69		hypothetical protein		Hypothetical proteins
DVU1667	1.8972	245.35		4.0275	296.07		4.7238	168.77		9.1825	4809.5	3	12.505	3645.6	2	7.5256	4466.4	1	FtsK/SpoIIIE family protein		Cellular processes	Cell division
DVU1319				5.2971	1262.3	3				9.178	7623.9	20	8.1447	5567.6	7	9.6144	10230	13	ribosomal protein L18 (rplR)		Protein synthesis	Ribosomal proteins: synthesis and modification
DVU1273	1.9152	242.78		5.7563	243.53		5.0762	143.95		9.17	1482.4	2	10.053	952.07	7	3.8034	736.32	1	bacterial type II/III secretion system protein		Protein fate	Protein and peptide secretion and trafficking
DVU0052	3.5214	456.85		3.1417	365.3		2.4437	360.03		9.1595	4186.7	2.5	16.075	6062.3	8.5	30.902	11176	3	GTP-binding protein Era (era)		Cellular processes	Cell division
DVU1529	3.5899	1217.4	4.33333							9.1581	11601	29	12.009	8868.7	40.5	6.097	6741.5	22.5	decarboxylase family protein		Unknown function	Enzymes of unknown specificity
DVU1931				2.5135	696.8		2.6622	506.63	1.33333	9.1574	8987.9	1.5	5.7121	5222.2	4	3.7762	2897.3	1	iron-sulfur cluster-binding protein		Energy metabolism	Electron transport
DVU0912	2.78	269.05		2.6424	335.85		2.1285	304.07		9.1562	5286.9		6.8333	3104.9		3.0269	2915.2		conserved domain protein		Hypothetical proteins	Domain
DVU3272	5.1648	863.17	4.33333	5.4478	845.03	4.66667				9.1521	6755.2	98	9.6721	4144.3	140	8.4918	2869.8	53	TPR domain protein		Unknown function	General
DVU0692	7.3576	931.45		3.2724	400.18		6.8553	638.17		9.1497	5378.6		13.237	2799.7		12.158	2758.4		molybdopterin oxidoreductase, transmembrane subunit, putatives		Energy metabolism	Electron transport
DVU2272	1.0475	97.075		3.6927	113.33	1	16.208	160.88		9.1425	1298	1.5	11.101	848.83	2.5	25.762	843.64	1	formate acetyltransferase, putative		Energy metabolism	Fermentation
DVU0511	3.0836	868.48		2.109	197.52		1.9027	192.08		9.1154	9503.2	8	17.071	19158	14	22.76	24639	13	conserved hypothetical protein		Hypothetical proteins	Conserved
DVU1022	3.6347	392.28		3.1765	411.87		3.1175	316.4		9.103	7239.7	5	11.702	6340.7	7	5.0585	1644.7	6	SUF system FeS assembly ATPase SufC, putative		Biosynthesis of cofactors, prosthetic groups, and carriers	Other
DVU2513	2.455	446.95		2.1958	206.15		1.9467	348.85		9.0731	10005		5.6258	5861.3		3.8368	3013.3		conserved hypothetical protein TIGR00242		Hypothetical proteins	Conserved
DVU2477	4.3691	303.48		5.3819	260.45		7.5847	530.73		9.0481	1707.6	2	18.436	1876.7	2	9.4014	652.88	2	phosphate ABC transporter, periplasmic phosphate-binding protein,sputative		Transport and binding proteins	Anions
DVU0902	3.447	261.82		3.6109	256.97		2.3139	238.38		9.032	3950.9		11.17	2817.1		6.0411	1780.8		TPR domain protein		Unknown function	General
DVU1130	1.8718	134.18		2.1161	212.23		1.5085	172.95		9.0317	428.59		4.7959	379.37		3.741	424.15		DNA-binding protein		Unknown function	General
DVU1075	2.493	894.87		2.7131	423.78		1.8721	466.03		9.019	22866		13.626	30772		15.451	27576		ribonuclease P protein component (rnpA)	3.1.26.5	Transcription	RNA processing
DVU3024	2.7514	1290.8		2.1906	598.62		2.8366	901.88		8.9887	22466		9.2523	19461		5.8736	7460.2		hypothetical protein		Hypothetical proteins
DVU0721	3.6994	293.92		3.9475	235.67		19.31	262.37		8.9818	1045.5		4.1982	1085.9		7.1855	513.28		sensory box histidine kinase		Signal transduction	Two-component systems
DVU2892				2.6452	226.5					8.9782	4015.6	6	10.267	4047.3	7.5	4.1481	2030.1	3.5	conserved hypothetical protein		Hypothetical proteins	Conserved
DVU1453	2.2891	372.23		6.0059	379.15		6.7473	328.92		8.9686	2535.6	1.5	12.541	1836.5	20	7.8593	1421.4	3	long-chain-fatty-acid--CoA ligase (fadD)	6.2.1.3	Fatty acid and phospholipid metabolism	Degradation
DVU1220	2.4103	208.78		2.3141	154.85		2.9133	116.52		8.9462	9003.2		9.6604	5362.6		3.8935	2808.2		nitroreductase family protein		Unknown function	Enzymes of unknown specificity
DVU2903	9.5846	1464.2	16.3333	9.8535	1054.9	9	8.3795	960.95	17.6667	8.9442	8952.3	25.5	13.194	5658.2	48.5	6.697	3953.1	20.5	HD domain protein		Unknown function	General
DVU0851	8.6951	1374.6	25	3.5173	349.3	14.3333	13.49	955.6	25.6667	8.9198	1642	244.5	12.036	891.92	262	5.6683	849.21	277	hypothetical protein		Hypothetical proteins
DVU0563	2.3443	225.78		2.3435	281.72		3.9098	620.48		8.8955	7798.3		11.89	6302.5		9.1507	6597.2		ISD1, transposase OrfB		Other categories	Transposon functions
DVU2220	1.7713	146.63		1.9618	148.8		1.3975	170.85		8.8409	16169		6.9141	12228		8.3693	10131		conserved hypothetical protein		Hypothetical proteins	Conserved
DVU2967	3.8166	721		3.4138	573.65		4.2051	716.8		8.8112	9732.4		8.6709	8845.9		6.3065	8650.1		sensor histidine kinase/response regulator		Regulatory functions	Protein interactions
DVU0263	4.8114	2391.3		4.2162	1241.5		5.6643	2169.1		8.7242	6192.8		6.6638	4717.7		3.9936	2242.6		acidic cytochrome c3		Energy metabolism	Electron transport
DVU2326	11.011	475.5		3.9451	201.3		4.1746	267.65		8.7219	1738.7	9.5	14.823	1335.2	5.5	4.2403	758.37	9	conserved domain protein		Hypothetical proteins	Domain
DVU1109				2.593	246.5		14.446	592.23		8.7192	2663.4	14.5	21.37	1925.4	11	7.5855	1368.9	5	ATPase domain protein		Unknown function	General
DVUA0075	6.9508	844.17		4.7345	474.15		7.77	591.95	1.66667	8.6842	5202	7	15.485	3173.7	13.5	5.6442	1874.1	16	radical SAM domain protein		Unknown function	Enzymes of unknown specificity
DVU2943	2.7558	363.27					1.3967	106.08		8.6808	8636.7	8	9.5425	6094.9	17.5	5.9238	6322.7	5	orotate phosphoribosyltransferase (pyrE)	2.4.2.10	Purines, pyrimidines, nucleosides, and nucleotides	Pyrimidine ribonucleotide biosynthesis
DVU1064	5.4486	371.68	8.66667	3.8792	314.18	3.66667	3.851	190.42	8.33333	8.6777	4741.5	82.5	11.142	3082.9	75.5	6.5289	1572.9	60.5	aconitate hydratase, putative		Energy metabolism	TCA cycle
DVU2947	3.2684	389.97		4.1133	212.9		4.1419	164.72		8.6588	6673.9	66.5	34.185	7414.8	96	16.58	3837.9	81	anaerobic ribonucleoside-triphosphate reductase, putatives		Purines, pyrimidines, nucleosides, and nucleotides	2'-Deoxyribonucleotide metabolism
DVU2822	0.66151	46.575		3.4326	110.02		3.698	122.4		8.6562	3320.7	1.5	10.131	1062.9	1.5	8.999	1546.1	1	TRAP dicarboxylate family transporter		Transport and binding proteins	Carbohydrates, organic alcohols, and acids
DVU0683	4.8173	1207.7		6.6628	972.52		5.5914	899.88		8.6463	5739.9	15	9.8028	4192.6	34	5.0934	2992.6	14.5	hflC protein, putative		Protein fate	Degradation of proteins, peptides, and glycopeptides
DVU0663							2.9097	249.47	2.33333	8.6429	5657.3	3.5	8.0322	3840.3	1	4.6801	2193.4	3	cysteine synthase A (cysK)	4.2.99.8	Amino acid biosynthesis	Serine family
DVU2104	7.2379	3764.8	6.66667	13.939	2746.6	11.3333	9.2067	1958.5	7.33333	8.6126	496.07	115	6.0568	430.96	188	7.4546	273.01	101	iron-sulfur cluster-binding/ATPase domain protein		Unknown function	General
DVU1563	0.27526	115.63		3.3765	156.45		33.634	248.53		8.6107	1091.7		4.4195	877.57		4.1034	934.78		sensory box histidine kinase/response regulator		Regulatory functions	Protein interactions
DVU0588	0.92461	35.7		2.6493	35.25		1.263	79.025		8.607	5310.2	11	12.53	5869.3	9	4.1299	2168.7	11	formate dehydrogenase, beta subunit, putative		Energy metabolism	Anaerobic
DVU2144	5.1648	746.62	8				7.1887	865.63	7.66667	8.5668	3956.3	25.5	9.3057	2599.1	19.5	8.667	3046.8	11	glyceraldehyde 3-phosphate dehydrogenase (gap-2)	1.2.1.12	Energy metabolism	Glycolysis/gluconeogenesis
DVU2836	2.6697	413.4		2.327	410.77		4.1327	605.25		8.5667	7061.7		6.2077	4236.1		4.8309	3149.1		hypothetical protein		Hypothetical proteins
DVU1441	4.3206	675.27		3.5754	618.13		3.5807	528.65		8.5607	7826.8	24	8.4139	6623.1	34	7.2783	4307.3	11.5	flagellin		Cellular processes	Chemotaxis and motility
DVU1700	2.3714	229.58		3.3112	314.6		7.2345	1531.9		8.5404	483.58		10.308	437.02		3.3938	529.58		metallo-beta-lactamase family protein		Unknown function	Enzymes of unknown specificity
DVU0175	0.36708	46.35								8.5331	4664	10.5	9.531	2908.8	6	2.7016	1204	11	tungsten formylmethanofuran dehydrogenase familysprotein/molybdopterin binding protein		Biosynthesis of cofactors, prosthetic groups, and carriers	Molybdopterin
DVU1381	1.7822	166.33		1.9742	192		1.6256	230.1		8.5284	14253		3.6471	6109.7		3.8467	4787.2		hypothetical protein		Hypothetical proteins
DVU1997	1.7121	113.9		1.766	186.97		2.0079	401.75		8.5248	98.287		3.8225	139.98		3.869	198.77		hypothetical protein		Hypothetical proteins
DVU0561	12.909	233.48		14.367	276.03		34.972	692.77		8.5219	6858.8	2	21.498	4293.1	1.5	11.652	6202.9	1	glycosyl transferase, group 1 family protein		Cell envelope	Biosynthesis and degradation of surface polysaccharides and lipopolysaccharides
DVU0745	13.482	1935.1	12	14.131	1656.6	7	11.333	2375.2	15.6667	8.4906	3548		12.691	2617.3		9.5847	5243.4		ABC transporter, periplasmic substrate-binding proteins		Transport and binding proteins	Unknown substrate
DVU2792	3.7851	604.88		4.196	478.27		4.1886	471.9		8.4861	4911.1	21	10.269	3408.7	19	4.0668	1021.7	13	electron transport complex protein RnfC, putative		Energy metabolism	Electron transport
DVU1175	3.2267	916.5		2.782	828.45		4.2068	753.72		8.4836	14271		14.421	21103		26.337	30028		hypothetical protein		Hypothetical proteins
DVU1558	10.637	496.83		2.7942	398.62		8.9455	476.17		8.4691	190.19		5.7742	189.07		6.4689	234.72		cysteine-rich domain/iron-sulfur cluster-binding domain proteins		Unknown function	General
DVU0114	2.0713	146.13		2.1347	73.625		1.5749	56.975		8.4569	6464.1	12	10.689	4452.2	8	13.961	5669.6	19.5	ATP phosphoribosyltransferase (hisG)	2.4.2.17	Amino acid biosynthesis	Histidine family
DVU1747	1.9268	368.3		5.8591	380.78		75.919	1240.1		8.4418	453.53		5.0837	258.33		12.797	230.72		ATPase, histidine kinase-, DNA gyrase B-, and HSP90-like domainsprotein		Unknown function	Enzymes of unknown specificity
DVU1050	7.424	581.02		4.0335	408.2		6.2729	463.25		8.4229	4837.8		11.916	2741		5.2896	1221.9		cytochrome c-type biogenesis protein CcmF (ccmF)		Energy metabolism	Electron transport
DVU0299	9.5362	885.48		9.144	632.15		6.09	634.02		8.413	7146	3	30.428	8476.1	9.5	4.2057	866.33	3	anaerobic ribonucleoside-triphosphate reductase, putatives		Purines, pyrimidines, nucleosides, and nucleotides	2'-Deoxyribonucleotide metabolism
DVU2133	0.75103	105		3.1325	106.25		7.9677	334.8		8.3941	828.71		12.11	780.89		3.6282	567.97		membrane protein, putative		Cell envelope	Other
DVU1709	1.4988	255.5		5.019	289.83		5.1408	421.53		8.3889	1226.2	2	6.1121	954.73	2	4.3063	744.92	1	type I restriction-modification system, M subunit (hsdM)s	2.1.1.-	DNA metabolism	Restriction/modification
DVU2442	2.1795	273.75		3.4198	919.77		1.78	319.25		8.3759	9150	2.5	6.1895	5938.8	3	4.7909	6529.2	3.5	heat shock protein, Hsp20 family		Protein fate	Protein folding and stabilization
DVU3356				5.9544	890.03	3.33333	7.0492	1095.2	4.33333	8.3646	11051	34	12.952	7750.3	31.5	3.9415	1817.1	17.5	NAD-dependent epimerase/dehydratase family protein		Cell envelope	Biosynthesis and degradation of surface polysaccharides and lipopolysaccharides
DVU0267	5.2036	5598.9		5.3757	2301.9		8.6515	6692.6		8.3597	20878		8.822	18556		11.88	19656		hypothetical protein		Hypothetical proteins
DVU0313	2.7307	360.65		4.0616	425.6		5.9379	452.45		8.3433	2804.8	4	8.6981	1742.6	3.5	3.4629	683.61	1.5	flagellar M-ring protein FliF (fliF)		Cellular processes	Chemotaxis and motility
DVU0418	3.7145	350.35	6.66667	3.1948	269.25	7	3.9962	368.2	8.33333	8.3427	3821.2	24.5	11.873	2331.1	15	6.4099	1466.4	10.5	saccharopine dehydrogenase (lys1)	1.5.1.7	Amino acid biosynthesis	Aspartate family
DVU2064	9.4307	1763.6		10.097	844.68		14.953	1471.9		8.3367	1583.7	21	15.9	1221.6	43	9.6006	902.39	11	oxidoreductase, 2-nitropropane dioxygenase family		Unknown function	Enzymes of unknown specificity
DVU0954	5.5247	359.85		3.8884	269.75		10.013	335.05		8.3318	5627.6	2.5	19.912	5455.5	1.5	8.7744	2588	2	organic solvent tolerance protein, putative		Cellular processes	Detoxification
DVU2394	3.0623	310.8		4.5026	284.55		5.7252	261		8.3043	3935.8		13.575	3388.9		6.4035	1208.3		sigma-54 dependent transcriptional regulator/response regulators		Regulatory functions	DNA interactions
DVU1791	2.6916	259.98		2.8167	272.65		2.0954	223.45		8.2907	7057	7.5	11.318	5653.4	8	8.2604	7965.6	8	GatB/Yqey family protein		Unknown function	General
DVU2717	2.3038	143.07		2.3126	70.65		12.785	207.25		8.2787	2775.3		11.199	2085.2		3.9515	1528.1		hypothetical protein		Hypothetical proteins
DVU2439	1.6726	66.375		3.5253	67.3		1.8718	55.875		8.2759	4426.6	1	11.924	3083.6	1	3.5019	1636.1	1	efflux transporter, RND family, MFP subunit		Transport and binding proteins	Unknown substrate
DVU1778	3.5449	330.73		3.1231	282.93		16	269.57		8.247	10148		21.286	9997		3.1176	2079.8		cation efflux family protein		Transport and binding proteins	Cations
DVU2569				2.6697	560.7					8.2311	10159	20.5	10.267	11444	18.5	3.5463	4723.3	9.5	peptidyl-prolyl cis-trans isomerase, FKBP-type		Protein fate	Protein folding and stabilization
DVUA0039	0.50443	59.1		3.4668	33.25		1.7508	121.45		8.2	309.39		3.7472	269.47		4.2678	261.42		chain length determinant family protein		Unknown function	Enzymes of unknown specificity
DVU0018	2.636	304.32		5.4437	230.4		38.802	542.72		8.14	811.91	10	6.4316	1006.6	5	3.4384	589.45	1.5	methyl-accepting chemotaxis protein, putative		Cellular processes	Chemotaxis and motility
DVU1583	8.3696	381.67		5.7078	321.58		3.7567	227.45		8.1369	5769.3		18.597	4791.9		7.7636	3278.1		TPR domain protein		Unknown function	General
DVU2842	2.7061	237.55		2.9004	266.92		4.2345	360.67		8.125	5232.2		11.559	3806.8		4.0727	2416.4		type II DNA modification methyltransferase, putative		DNA metabolism	Restriction/modification
DVU3307	3.706	737.02		2.1707	304.98		1.7421	282.55		8.1059	12923		14.645	20224		26.421	30616		3-octaprenyl-4-hydroxybenzoate carboxy-lyase (ubiX)	4.1.1.-	Biosynthesis of cofactors, prosthetic groups, and carriers	Menaquinone and ubiquinone
DVU3031	3.476	603.35		2.9562	330.3		4.2574	519.15		8.0618	11445	2	11.341	11916	7	3.3408	2332.3	1	conserved hypothetical protein		Hypothetical proteins	Conserved
DVU0841	3.3602	334.95	6.33333	2.6049	275.43	5.33333	5.4094	439.5	6.33333	8.0334	12450	18.5	9.8914	8275.9	22.5	6.2963	3615.6	6.5	aspartate aminotransferase, putative		Amino acid biosynthesis	Aspartate family
DVUA0063	4.9584	156.82		2.7517	85.525		4.3793	193.45		8.0082	498.5		3.534	480.81		2.0097	598		Orn/DAP/Arg family decarboxylase		Unknown function	Enzymes of unknown specificity
DVU1510	4.0128	475.1		2.7584	551.87		4.7727	641.55		8.0029	8548.4		9.3198	6232.9		6.8181	6943		hypothetical protein		Hypothetical proteins
DVU0371	4.0904	269.95		4.1394	302.43		9.0372	208.22		7.9902	1941.8	180	20.336	2295.2	362.5	35.828	5431.7	258.5	conserved hypothetical protein		Hypothetical proteins	Conserved
DVU0855	5.2748	895.17	1	4.9913	734.9		5.9289	428.07		7.982	4967.3	2	17.004	4899.7	5.5	4.3098	1724.7	1.5	radical SAM domain protein		Unknown function	Enzymes of unknown specificity
DVU3235	3.7349	736	2.66667	2.9941	393.15	2				7.9754	9856.6	5	6.5463	5844.2	7.5	2.6065	1965.5	4	IMP cyclohydrolase, putative		Purines, pyrimidines, nucleosides, and nucleotides	Purine ribonucleotide biosynthesis
DVU1244	2.7963	505.25		2.3701	395.88		2.4047	448.4		7.9728	8098.4	1	7.3354	6434.5	1	4.231	4009.5	1	conserved hypothetical protein		Hypothetical proteins	Conserved
DVU1796	3.2494	2284		2.3087	718.07		4.2429	1835.7		7.9629	22531		6.9769	17158		14.442	23860		hypothetical protein		Hypothetical proteins
DVU1622	2.5091	348.73					3.4322	348.83		7.953	9931.6	4.5	10.413	8977.3	9	16.357	10022	4.5	phosphoribosylformylglycinamidine synthase I (purQ)	6.3.5.3	Purines, pyrimidines, nucleosides, and nucleotides	Purine ribonucleotide biosynthesis
DVU3281	2.6515	383.48		2.4283	415.6		1.6551	156.62		7.9281	8118.1	1	5.4036	5155.7	1	4.1317	3683.4	1	hypothetical protein		Hypothetical proteins
DVU0442	1.997	163.82		3.0661	190.48		3.4864	222.2		7.9169	413.93		7.4711	373.71		6.0916	393.37		phoH-related protein		Unknown function	General
DVU3345	1.7857	106.02		2.0241	160.15		1.9056	251.65		7.9028	9539.7		6.6115	7022.4		5.1835	5266.4		hypothetical protein		Hypothetical proteins
DVU0401	2.2577	205.1		1.9165	237.73		1.5861	213.33		7.8898	95.707		4.5418	127.14		4.6091	125.79		hypothetical protein		Hypothetical proteins
DVU0536	0.46193	20.85		2.5189	51.25		4.8548	48.375		7.8445	278.18	1	7.1767	262.03	1	13.03	1079.6	1	high-molecular-weight cytochrome C (hmcA)		Energy metabolism	Electron transport
DVU1029	2.7352	174.12	1.33333	2.5188	262.08		2.3975	303	1.33333	7.8374	4845.9	3.5	9.5006	4150.7	2	11.18	4703.7	2.5	histidinol-phosphate aminotransferase (hisC)	2.6.1.9	Amino acid biosynthesis	Histidine family
DVU1548	6.0501	510.63		4.9875	478.32		4.5713	99.25		7.8122	7343.1		21.532	3909.4		6.2936	1059.8		outer membrane transport protein, OmpP1/FadL/TodX familys		Transport and binding proteins	Unknown substrate
DVU0047	2.7192	396.93		2.5465	294.5		1.9521	402.1		7.8078	5356.8		11.953	7366.9		6.3921	4393.3		flagellar protein FliL		Cellular processes	Chemotaxis and motility
DVU0521	2.3898	514		2.2886	521.48		2.2073	582.57		7.8059	11882		4.9787	6344.6		3.2557	2175.5		carbon storage regulator (csrA)		Energy metabolism	Glycolysis/gluconeogenesis
DVU1572	3.3166	777.12								7.8058	8323.3	1.5	15.725	10685	1	9.9962	11297	2	transcriptional regulator, CarD family		Regulatory functions	DNA interactions
DVU2510	1.2056	193.03		2.6528	89.5		3.8401	103.02		7.803	1408.6		7.7347	934.24		2.8772	558.46		penicillin-binding protein		Cell envelope	Biosynthesis of murein sacculus and peptidoglycan
DVU2776	5.4869	2145.2	10	7.1097	1470.7	28.6667	5.3806	1336.7	7.66667	7.8026	4553.1	595.5	6.9647	2203.2	469.5	4.3778	2036.7	236	dissimilatory sulfite reductase, gamma subunit (dsvC)s	1.8.99.3	Central intermediary metabolism	Sulfur metabolism
DVU2645	0.73135	72.1		2.8131	45.05		3.0782	124.58		7.7903	677.07		6.3312	532.85		3.5289	597.2		Na+/H+ antiporter family protein		Transport and binding proteins	Cations
DVU2157	0.51484	36.325		3.2632	9.025		2.6876	31.775		7.7705	1086.7		9.0319	855		3.054	990.74		tail tape meausure protein, putative		Other categories	Prophage functions
DVU0415	7.1251	173	14	3.5252	204.27	4.66667				7.7666	6862.1	16.5	15.029	6810.5	21.5	7.3597	6190.4	9.5	cytosol aminopeptidase (pepA)	3.4.11.1	Protein fate	Degradation of proteins, peptides, and glycopeptides
DVU1343	5.3163	837.65	2.33333	6.42	785.88	5	4.3768	576.85		7.7489	9606	20	7.9968	4681.6	17	2.5642	1570.7	23.5	cation ABC transporter, periplasmc-binding protein		Transport and binding proteins	Cations
DVU1790	8.4385	327.45		3.6803	306.05		12.507	209.25		7.7457	1080.3	1	5.0585	1059.9	2	3.4818	960.92	1.5	MutS2 family protein		DNA metabolism	Other
DVU2540	2.5445	201.35	5				3.496	179.32	4	7.7423	543.14		7.0635	652.08		4.2324	535.4		lyase, putative		Unknown function	General
DVU0091	3.7394	547.45		3.4867	474.23		3.7698	575.95		7.7349	3276.6		8.7412	2300.3		4.6388	1845.4		conserved hypothetical protein		Hypothetical proteins	Conserved
DVU2686	3.8947	213.05		2.4173	221.58		11.798	454.37		7.7122	5904	1	12.873	5389.6	1.5	7.3748	7251.6	1	peptidase, S24 family		Protein fate	Degradation of proteins, peptides, and glycopeptides
DVU1867	3.6787	504.45		3.0622	419.8		3.2788	325.72		7.6881	10079		8.967	8895.4		4.9941	4609.1		diaminopimelate epimerase (dapF)	5.1.1.7	Amino acid biosynthesis	Aspartate family
DVU2503	3.1185	333.95		2.4273	130.88		6.215	204.53		7.6742	4927.9	3.5	10.771	3699.7	14	4.4225	1355.3	3.5	UDP-N-acetylmuramate--alanine ligase (murC)	6.3.2.8	Cell envelope	Biosynthesis of murein sacculus and peptidoglycan
DVU0566				13.503	2515.7	32.3333	7.2553	3909.7	3.33333	7.6717	7590.5	108	11.383	5710.6	120.5	3.5113	2537.9	85.5	GAF domain protein		Unknown function	General
DVU3338	2.015	219.03		4.3724	170.72		5.694	212.48		7.6681	868.83		6.138	654.97		2.1559	633.85		potassium-transporting ATPase, B subunit (kdpB)	3.6.1.36	Transport and binding proteins	Cations
DVU3226	2.0686	330.05		2.3092	430.63		1.81	363.22		7.6653	9640.7		8.5269	11230		5.6769	7523.1		hypothetical protein		Hypothetical proteins
DVU2891	2.2568	426.38		3.2615	611.07		2.7238	471.4		7.6055	7433.7		8.0026	6187.4		3.4365	2695		nickel responsive regulator (nikR)		Regulatory functions	DNA interactions
DVU3212	8.5857	558.52	18	8.907	650.13	16	10.226	345.18	22	7.6012	4484.3	150.5	16.93	4145.5	160	17.203	6786.7	142	pyridine nucleotide-disulfide oxidoreductase		Unknown function	Enzymes of unknown specificity
DVU1999	3.0113	229.4		2.9819	301.6		13.177	448.63		7.5812	1066.2		11.291	929.32		2.6635	686.99		sulfate transporter family protein		Transport and binding proteins	Anions
DVU1589	2.8722	319.13		3.244	355.28		4.0914	296.83		7.5664	1977.8	7.5	11.894	2117.8	9	5.1648	1714.1	5	hypothetical protein		Hypothetical proteins
DVU3082	3.1162	209.87		3.1017	228.02		4.0702	206.97		7.5571	1650.9	16	11.224	2311.8	8.5	2.5837	1201.9	5.5	methyl-accepting chemotaxis protein		Cellular processes	Chemotaxis and motility
DVU2958	8.2464	678.4		3.7141	457.97		5.0574	759.22		7.5528	4591.5		6.875	1940.8		5.7157	1589.2		membrane protein, putative		Cell envelope	Other
DVU0941	9.5395	465.87	18.6667				8.7895	344.53	22.3333	7.5448	3345.4	23.5	9.1029	3595.4	26.5	5.4529	3897.9	12.5	peptidase, M16 family		Protein fate	Degradation of proteins, peptides, and glycopeptides
DVU0889	2.8247	108.8		2.1658	72.8		3.7006	221.82		7.5365	526.97		4.4547	522.25		2.5193	456.74		phosphonopyruvate decarboxylase-related protein	4.1.1.-	Unknown function	General
DVU1174	2.5948	721		2.6145	591.1		2.2424	541.92		7.5353	9303.8	2	8.2153	10181	2	9.2859	10562	3	hypothetical protein		Hypothetical proteins
DVU0827	3.7766	296.02		3.1852	271.48		3.0745	276.75		7.5003	3704.9		8.9555	3253.6		3.2795	1882.9		glycolate oxidase, subunit GlcD, putative		Energy metabolism	Other
DVU1198	3.2731	615.68	5	2.5507	318.02	6				7.4912	3839.3	31	8.0365	3258.1	59	6.6918	2584.7	38.5	riboflavin synthase, beta subunit (ribH)	2.5.1.9	Biosynthesis of cofactors, prosthetic groups, and carriers	Riboflavin, FMN, and FAD
DVU0417	1.6958	221.2		3.0346	223.23		4.0897	157.93		7.489	5206.3	1	11.826	2874.5	3	7.6479	1751.3	1	arginine decarboxylase (speA)	4.1.1.19	Central intermediary metabolism	Polyamine biosynthesis
DVU2003	0.82372	71.275		3.2556	119.3		3.4589	163.3		7.4691	240.14		4.1373	307.09		2.7832	362.78		transposase, IS5 family, truncation		Disrupted reading frame
DVU0312	3.2998	271.15		2.6856	207.07		2.1927	123.55		7.4519	2360.2	1.5	8.252	2252.1	1.5	3.65	977.61	2	flagellar motor switch protein FliG (fliG)		Cellular processes	Chemotaxis and motility
DVU1490	0.064164	56.125		3.3497	134		45.776	183.47		7.4467	363.46		4.7181	351.64		5.6967	372.18		tail tape measure protein, putative		Other categories	Prophage functions
DVU1841	3.3016	437.6	1.66667	2.6856	340.5	3.66667	4.0833	344.67	2.66667	7.4436	7306.2	18	11.253	5536.2	20.5	6.0189	5098.3	7.5	fructose-1,6-bisphosphatase (fbp)	3.1.3.11	Energy metabolism	Glycolysis/gluconeogenesis
DVU0056	4.482	727.87		3.3666	578.05	2.33333	2.5017	469.13		7.4247	5577.6	3.5	8.7738	4746.9	6	4.1452	1891	5.5	chemotaxis protein CheV (cheV-1)		Cellular processes	Chemotaxis and motility
DVU0487	2.665	305.22	6.66667				2.0317	263.43	6.66667	7.4192	10042	8.5	4.3221	4286.9	11	2.5842	2665.9	10	phosphoribosylaminoimidazole carboxylase, catalytic subunit (purE)s	4.1.1.21	Purines, pyrimidines, nucleosides, and nucleotides	Purine ribonucleotide biosynthesis
DVU0395	5.4355	3678		6.5754	1486.5		5.5569	2101.1		7.4139	25659	1	9.8659	18260	1	8.0949	9816	1	HIT family protein		Unknown function	General
DVU1201	3.1061	288.18		2.2255	246.7		2.3187	196.37		7.4119	6302.1		9.1726	6638.9		8.8774	7005		riboflavin biosynthesis protein RibD (ribD)		Biosynthesis of cofactors, prosthetic groups, and carriers	Riboflavin, FMN, and FAD
DVU3176	4.1943	518.28		3.5987	479.02					7.4116	3300.3	15	10.508	3342.7	16	6.3051	2914.8	9	UDP-glucose/GDP-mannose dehydrogenase family protein		Cell envelope	Biosynthesis and degradation of surface polysaccharides and lipopolysaccharides
DVU1562	0.45552	197.63		5.7159	254.9		9.9391	204.7		7.4043	837.53		11.412	967.74		3.0829	1008.3		HAMP domain protein		Unknown function	General
DVU3210	3.286	344.35		2.7499	291.55		2.9807	299.33		7.3748	4609.8	7.5	10.845	3188.9	6.5	4.5801	2247.9	3	threonine synthase (thrC)	4.2.99.2	Amino acid biosynthesis	Aspartate family
DVU1571	3.9141	467.13		4.2971	359.98		7.0629	446.8		7.3688	3361.3	8.5	17.99	4820.3	14	19.225	6293.6	8.5	transcription termination factor Rho (rho)		Transcription	Transcription factors
DVU1231	2.5431	173.83		3.1107	221.27		6.9957	226.05		7.3565	1097.3		11.532	811.69		7.7372	1091.3		ammonium transporter (amt)		Transport and binding proteins	Cations
DVU1851	11.025	1284.9		9.1665	1314.5		14.219	1092.4		7.3501	5317.1	14.5	13.603	5934.9	6	14.945	8559.4	12.5	peptidase, M23/M37 family		Protein fate	Degradation of proteins, peptides, and glycopeptides
DVU0448	3.4545	328.83	6	2.3264	174.12	9.33333	3.248	320.27	6	7.3467	7000.1	13.5	11.671	5629.9	24.5	4.3509	3255.2	12.5	GDP-mannose 4,6-dehydratase (gmd)	4.2.1.47	Cell envelope	Biosynthesis and degradation of surface polysaccharides and lipopolysaccharides
DVU0910	3.5277	581.05		3.485	582.32		2.9478	368.05		7.3287	3258.2		9.21	3171.9		4.8218	1864.7		flagellar motor switch protein FliM (fliM)		Cellular processes	Chemotaxis and motility
DVU2838	11.973	820.1		7.2039	625.57		62.288	2615.1		7.2703	5521.3		17.317	4498.9		3.5948	2168.7		conserved hypothetical protein		Hypothetical proteins	Conserved
DVU0148	2.4543	239.2		2.7844	230.4		3.1014	253.52		7.2369	2423		9.3215	1667.1		5.6735	1543.4		lipoprotein, putative		Cell envelope	Other
DVU1466	2.2832	254.75		2.8373	239.82	1	3.162	212.65		7.2326	2591.7	8	10.195	1919.6	8.5	6.1435	1805.1	6	acetylglutamate kinase (argB)	2.7.2.8	Amino acid biosynthesis	Glutamate family
DVU1400	0.76079	90.325		2.5988	82.675		5.0199	151.53		7.2319	1405.4	9.5	8.643	1510.2	5	2.952	1008.4	1.5	methyl-accepting chemotaxis protein		Cellular processes	Chemotaxis and motility
DVU1249	4.1492	247.25	5				2.0915	63.425	5.33333	7.2249	8096.7	33.5	5.8804	4141.3	13.5	4.1111	3383.7	7	malonyl CoA-acyl carrier protein transacylase (fabD)	2.3.1.39	Fatty acid and phospholipid metabolism	Biosynthesis
DVU0664	4.1565	433.48	6.66667				3.1595	219.35	4.33333	7.2118	3972.6	23.5	9.5313	3645.1	26	3.9586	1716.4	9	cysteine desulfurase	4.4.1.-	Amino acid biosynthesis	Pyruvate family
DVU2643				9.6543	568.67	13.3333	3.9511	222.25	3	7.205	3004.7	59	10.156	2062.7	69	4.4915	978.94	38.5	heat shock protein HtpG (htpG)		Protein fate	Protein folding and stabilization
DVU2590	6.2921	737.9	2.33333	5.1285	498.4	8.66667	5.9761	647.3	9.33333	7.2023	8489.5	13.5	11.437	7800	28.5	1.7743	3142.5	8	sensory box protein		Regulatory functions	Small molecule interactions
DVU2399	7.7427	2127.9	24				6.8005	1807.4	15	7.1997	13680	42	13.768	14402	59	2.9553	2669.8	26	hydrogenase, putative		Energy metabolism	Electron transport
DVU1911	2.8074	463.5		3.899	515.15	1.33333				7.1968	4560.8	8	8.1691	4107	11.5	4.3932	3051.2	3	CBS domain protein		Unknown function	General
DVU3172	7.9241	504.88	7							7.1812	7366.1	2.5	6.6114	8286.3	3	29.493	10810	4	hypothetical protein		Hypothetical proteins
DVU2179	2.8837	495.7		2.9233	617.23		5.432	999.05		7.179	5032		6.5014	3654.9		3.7276	2499.2		ISDvu2, transposase OrfA		Other categories	Transposon functions
DVU0426	1.4995	77.6		2.1126	47.325		2.0636	56.3		7.1781	81.676		4.9139	125.71		2.3846	206.83		chromate transport family protein		Cellular processes	Detoxification
DVU0815	3.3686	194.72		4.221	367.65		6.3409	191.12		7.145	2818.9	1	11.334	2320.7	1	3.5595	1511.5	2	AsmA family protein		Cell envelope	Biosynthesis and degradation of surface polysaccharides and lipopolysaccharides
DVU1503	0.26182	33.75		2.6622	107.38		6.6187	156.93		7.1402	559.58		7.0978	415.45		2.5876	589.7		terminase, large subunit		Other categories	Prophage functions
DVU2295	3.991	275.63		3.3983	232.45		7.229	297.67		7.1224	1818.9	10.5	6.2922	1142.7	7	3.7083	1212.1	3.5	methyl-accepting chemotaxis protein		Cellular processes	Chemotaxis and motility
DVU0273	10.445	1930.4		11.371	1118.5		10.637	1072.3		7.1077	3722.4	4.5	12.225	3262.3	11	18.881	5562.5	7	conserved hypothetical protein		Hypothetical proteins	Conserved
DVU2252	2.8048	204.75		2.4253	168.12		3.7194	175.63		7.0938	2141.2		10.181	2737.7		5.8586	2157.7		chromosomal replication initiator protein DnaA (dnaA-2)s		DNA metabolism	DNA replication, recombination, and repair
DVU1178	1.2529	32.5		2.0189	65.975		1.3332	169.68		7.0915	19225		8.7635	18933		10.953	16339		hypothetical protein		Hypothetical proteins
DVU1951	5.4646	336.9	1.33333	3.0621	326.32		5.3659	379.25		7.0832	2597.9	40	8.6955	1680.7	82	4.9762	1755.4	30.5	indolepyruvate ferredoxin oxidoreductase, alpha subunit, putatives		Energy metabolism	Anaerobic
DVU1962	3.3413	217.35		3.3246	215.05		6.5873	223.4		7.0794	904.46	3	3.7577	790.26	2.5	2.3478	593.48	1	methyl-accepting chemotaxis protein		Cellular processes	Chemotaxis and motility
DVU2752	9.4457	4988.5		14.688	1809.7		8.154	2112		7.0696	2410		8.8909	1859.7		4.9294	670.63		rhodanese-like domain protein		Unknown function	General
DVU2441	2.4189	378.9		3.4889	1092.5		2.0488	440.08		7.0663	6919.8	1	5.6599	4742.2	2	7.2025	7076.4	7	heat shock protein, Hsp20 family		Protein fate	Protein folding and stabilization
DVU0750	4.7417	132.48		2.7726	199.7		5.2988	245.1		7.0653	1155.5	11	5.9259	1295.7	5	2.8949	1152.5	2.5	methyl-accepting chemotaxis protein		Cellular processes	Chemotaxis and motility
DVU2668	5.2885	608.07	4	3.9216	481.92	2.66667	5.6022	314.77	1	7.0461	1801	6	9.6007	1588.8	6.5	3.175	951.42	4	UDP-N-acetylglucosamine pyrophosphorylase, putative		Cell envelope	Biosynthesis and degradation of surface polysaccharides and lipopolysaccharides
DVU0046							2.8865	494.35	2.33333	7.0417	4367.2	3.5	7.2438	3647.3	5	4.4257	2197.5	3	flagellar motor switch protein FliN (fliN)		Cellular processes	Chemotaxis and motility
DVU3127	3.9869	399.75		8.0656	392.15		11.189	447.55		7.0293	2293.7		10.638	1376.7		4.0096	480.31		paraquat-inducible protein B (pqiB)		Unknown function	General
DVU1682	2.8414	246.88					5.0209	237.8		7.0131	5851.4	1	11.889	5539.8	7.5	6.7792	2852.1	1	GAF domain protein		Unknown function	General
DVU2398							4.4782	1623.9	21	7.0126	6971.6	58.5	6.5204	6149.8	62	2.4442	1953.2	39	conserved hypothetical protein		Hypothetical proteins	Conserved
DVU2404	4.3963	2337.7		3.7627	1389.5		4.7338	2104.3		7.0086	19624	14.5	6.7626	14184	19.5	3.6605	6149.6	11	heterodisulfide reductase, C subunit (hdrC)		Energy metabolism	Electron transport
DVU2824	0.89966	124.2		3.5351	106.78		9.3049	102.1		7.0074	1432.4	9.5	7.6777	971.16	7	25.338	894.96	8	formate acetyltransferase		Energy metabolism	Fermentation
DVU1782	3.7637	440.77		3.2971	377.07		5.7687	867.67		6.9926	3603.4	3.5	10.868	3697.7	1	3.955	2423.2	3	iron-sulfur cluster-binding protein		Energy metabolism	Electron transport
DVU1551	3.8604	223.15		2.6904	120.1		9.0635	216.7		6.984	1219		6.6335	1196.9		2.1119	976.33		HD domain protein		Unknown function	General
DVU2343	2.9011	348.18		2.6776	150.93		3.5632	539.67		6.9714	548.45		6.9566	473.68		4.0505	957.4		amino acid ABC transporter, ATP-binding protein		Transport and binding proteins	Amino acids, peptides and amines
DVU2329	3.8567	1255.9	2.33333							6.964	7094.6	7.5	5.679	3887.1	27	4.654	2381.7	3	hydrogenase accessory protein HypB (hypB)		Protein fate	Protein folding and stabilization
DVU1559	35.698	2752.8	38.6667	21.677	1078	48.3333	17.602	2555.5	61.6667	6.9499	1043.1		7.283	960.92		6.2824	720.99		aldehyde oxidoreductase (mop)	1.2.-.-	Central intermediary metabolism	Other
DVU0374	1.3056	142.23		2.8859	168.63		4.2726	104.58		6.949	1535.9		7.1314	982.57		6.056	805.79		pyruvate ferredoxin/flavodoxin oxidoreductase family proteins		Energy metabolism	Fermentation
DVU0213	1.6057	92.8		3.282	128.7		6.3962	99.025		6.9261	1289.7		11.955	1463.8		2.916	607.16		conserved domain protein		Hypothetical proteins	Domain
DVU1107	4.3733	209.02		4.0172	190.4		5.1508	91.55		6.912	353.31		5.2251	429.84		2.7961	473.56		tail tape measure protein		Other categories	Prophage functions
DVU1882	4.2104	299.1		7.5894	349.92		9.0033	333.35		6.9115	3525.8		11.991	2516.3		2.7456	588.48		HDIG domain protein		Unknown function	General
DVU1094	4.397	370.08	3.33333	3.5235	380.05	2.33333	4.1994	317.35	2.33333	6.8909	3741.7	12	9.1874	3488.2	15.5	4.5135	1573.1	7	argininosuccinate lyase (argH)	4.3.2.1	Amino acid biosynthesis	Glutamate family
DVU0446	2.3542	153.15		2.7754	124		8.7875	1353.5		6.8897	652.3		4.8676	534.31		2.4939	384.68		sodium/solute symporter family protein		Transport and binding proteins	Cations
DVU3275	0.81627	8.2		2.7057	8.625		0.58807	9.725		6.8769	18482		4.8237	10445		4.0216	5719.5		hypothetical protein		Hypothetical proteins
DVU2609	4.2924	386.67		2.95	396.72		3.5667	451.23		6.8714	4508		7.3613	2665.9		3.3106	700.19		chemotaxis MotB protein, putative		Cellular processes	Chemotaxis and motility
DVU1373	3.2925	555.5		2.5931	424.98		1.8714	306.83		6.8677	7594.2	1.5	6.5989	5492.8	3	3.6991	2606.7	1	cell-division initiation protein DivIVA (divIVA)		Cellular processes	Cell division
DVU3352	4.2441	766.83		3.1117	676.1		3.1664	529.02		6.866	9982.3	13	6.9855	7681.1	9.5	9.4471	6742.3	3.5	lipoprotein, putative		Cell envelope	Other
DVU0638	4.4468	400.15		2.5122	362.9		2.6675	280.4		6.8659	7997.6		17.513	14551		10.429	7893.5		membrane protein, putative		Cell envelope	Other
DVU1486	0.29474	55.6		2.1287	147.5		45.378	157.6		6.8638	372.7		2.4914	353.17		2.8291	277.71		tail fiber protein, truncation		Disrupted reading frame
DVU2570	2.194	182.25		3.3541	165.33		10.928	182.65		6.861	1958.5		8.0359	2220		2.9726	1675.1		GGDEF domain/HAMP domain protein		Unknown function	General
DVU2743	0.33334	26.8		2.7403	39.425		3.4195	180.32		6.8542	657.04		4.3631	661.05		2.9203	547.53		high-affinity branched-chain amino acid ABC ransporter, permeasesprotein (livH)		Transport and binding proteins	Amino acids, peptides and amines
DVU2827	1.4519	179.75		3.6009	191.95		3.3109	268.4		6.8361	2005.5		23.175	4780.6		8.5958	4060.5		sigma-54 dependent transcriptional regulator		Regulatory functions	DNA interactions
DVUA0045	5.2414	122.07		2.4793	104.28		5.7546	104.03		6.8123	620.45		2.3516	671.69		2.1733	559.86		aminotransferase, DegT/DnrJ/EryC1/StrS family		Unknown function	Enzymes of unknown specificity
DVU1907	2.3671	211.6		2.4509	140.8	3	4.6573	247.85		6.809	1755.5	34	10.086	1496.8	35.5	3.8984	919.36	25	UDP-glucose 6-dehydrogenase (ugd)	1.1.1.22	Cell envelope	Biosynthesis and degradation of surface polysaccharides and lipopolysaccharides
DVU3373	4.1533	322.15	4.33333	2.8409	240.8	4	4.9345	362.93	5.33333	6.8031	6099.7	26.5	8.6457	3479.4	44.5	8.0344	1911.9	15.5	dihydroxy-acid dehydratase (ilvD)	4.2.1.9	Amino acid biosynthesis	Pyruvate family
DVU2082	8.2533	2070.6		8.2747	1379.6		7.8494	2413.1		6.7868	5096.9		7.1763	2975.6		3.5905	824.34		flagellin, putative		Cellular processes	Chemotaxis and motility
DVU0535	5.812	282.05		3.3555	225.5		3.9492	196.4		6.7736	262.16	1	5.9309	218.34	1	3.7103	712.86	1	hmc operon protein 2		Energy metabolism	Electron transport
DVU0166	2.4909	273.8		3.0241	239.55		4.168	260.78		6.7454	3991.5	3	9.1189	3219.6	3.5	4.6524	2599	2	oligopeptide/dipeptide ABC transporter, ATP-binding proteins		Transport and binding proteins	Amino acids, peptides and amines
DVU0328	3.8231	227.3		2.1664	166.55		2.9989	192.55		6.7381	5609.3		8.59	5628.3		9.1157	5042.4		glycosyl transferase, group 1 family protein		Cell envelope	Biosynthesis and degradation of surface polysaccharides and lipopolysaccharides
DVU1053	1.629	84.05		1.8964	142.33		1.1623	125.68		6.7261	116.74		4.1198	138.81		3.817	209.22		hypothetical protein		Hypothetical proteins
DVU0887	3.7055	143.27		2.5544	120.03		2.5348	104.42		6.7197	532.12		2.5149	497.43		1.9191	522.82		transglycosylase, putative		Unknown function	Enzymes of unknown specificity
DVU0319	3.0974	386.8	23	2.3987	282.87	30.6667	1.9299	115.32	27.3333	6.7071	11786	10.5	10.149	8290.8	28.5	6.9602	4187.5	2	NAD-dependent epimerase/dehydratase family protein		Cell envelope	Biosynthesis and degradation of surface polysaccharides and lipopolysaccharides
DVU0879	2.274	626.17		2.2599	657.95		2.9516	957.7		6.6913	18894		5.9682	14996		15.281	26553		hypothetical protein		Hypothetical proteins
DVU1664	3.7793	365		4.0063	430.48		2.8997	391.27		6.6873	4498.1		19.008	8779.1		19.271	15518		GTP-binding protein		Unknown function	General
DVUA0074	2.9345	810.55		3.991	583.2		3.8499	979.55		6.6857	10934	13.5	9.0346	8176.7	19	3.4595	3713.9	22	sulfotransferase family protein		Unknown function	Enzymes of unknown specificity
DVU2017	2.8754	137.2		2.8235	203.15		5.0122	357.07		6.6845	2311.1		8.984	2031.1		3.5834	1329		ISDvu5, transposase		Other categories	Transposon functions
DVU2774	3.4981	701	1				7.0767	1156.3	1.33333	6.6835	2308.8	39	8.6288	1647	77.5	3.751	1053.2	14	CBS domain protein/ACT domain protein		Unknown function	General
DVU2317	4.3489	208.27		3.0848	237.15		5.1326	228.73		6.6594	1285.7	13.5	6.6357	1084.2	8	2.7989	1069.1	5	methyl-accepting chemotaxis protein, putative		Cellular processes	Chemotaxis and motility
DVU1942	2.7373	123.6		3.7878	182.73		4.4004	117.12		6.6512	4360.8	1	16.59	4262.2	2.5	3.3002	2158.6	1.5	DAK2 domain/degV family protein		Unknown function	General
DVU2415	1.3784	49.2		2.1665	99.1		1.9707	83.45		6.6443	103.64		4.5139	139.6		3.5239	148		hypothetical protein		Hypothetical proteins
DVU0951	4.2137	268.18		2.4098	215.63		3.4887	185.6		6.6414	9912.5	2	9.2759	7325.6	1.5	3.9715	2146.4	1	molybdopterin biosynthesis MoeA protein, putative		Biosynthesis of cofactors, prosthetic groups, and carriers	Molybdopterin
DVU1242	2.9061	312.1		2.424	237.83		3.3737	324.37		6.6089	7885.3	1	8.1843	5202.7	3	5.3162	3054.6	1.5	vacJ lipoprotein, putative		Cell envelope	Other
DVU1594	3.804	396.58		3.8003	353.08		7.3321	606.08		6.6024	2235.3		6.0447	1885.9		2.6712	1418.3		chemotaxis protein CheA (cheA-1)		Cellular processes	Chemotaxis and motility
DVU0182	1.4024	115.05		3.3446	229.05		2.56	177.7		6.6002	1246.3		6.975	741.63		3.5347	535.42		radical SAM domain protein		Unknown function	Enzymes of unknown specificity
DVU0550	2.3932	276.15		3.1829	299.47		3.3013	232.33		6.5999	7295.5	1	7.7334	4904.4	2	4.1752	4010.9	1	high-affinity branched-chain amino acid ABC transporter, ATPsbinding protein		Transport and binding proteins	Amino acids, peptides and amines
DVU0543	1.4009	153.72		2.5835	55.85		5.8947	189.02		6.5768	735.48		11.57	570.89		5.1758	478.95		conserved hypothetical protein		Hypothetical proteins	Conserved
DVU2982	4.3951	409.02		4.0074	497.7		6.0355	208.53	1	6.5756	3618.9	58	7.9969	2015	28.5	5.3476	3359	23	3-isopropylmalate dehydratase, large subunit, putative		Amino acid biosynthesis	Pyruvate family
DVU0795	3.7986	671.87		6.0048	571.1		3.2391	345.53		6.5675	4033.8	10	10.669	3184.2	3	7.105	3498.6	3.5	phosphoribosylaminoimidazole-succinocarboxamide synthase (purC)s	6.3.2.6	Purines, pyrimidines, nucleosides, and nucleotides	Purine ribonucleotide biosynthesis
DVU2784	5.4799	426.8	9.66667	5.4337	627.95	18	4.4932	170.12	33	6.5382	3637.4	35.5	10.59	2731.1	37	5.3453	930.75	19.5	dehydrogenase, FMN-dependent family		Unknown function	Enzymes of unknown specificity
DVU0591	29.911	920.97		4.5597	490.27	1.33333	16.357	1100		6.536	1380.5	4	6.3789	1267.8	2.5	2.7417	600.53	5.5	methyl-accepting chemotaxis protein		Cellular processes	Chemotaxis and motility
DVU0637	1.583	152.72		3.7271	258.1		5.4689	220.23		6.5319	2312	1.5	12.592	2453.6	3	12.956	3724.9	2	conserved hypothetical protein		Hypothetical proteins	Conserved
DVU0001	3.4053	383.4		2.3998	328.55		2.7936	393.05		6.5271	5634.5		5.9237	3280.2		4.5595	3176.5		chromosomal replication initiator protein DnaA (dnaA-1)s		DNA metabolism	DNA replication, recombination, and repair
DVU2548	3.1681	255.65	14.3333	2.8954	242	41.3333	4.1424	492.93	17.3333	6.5091	6317	23.5	8.8813	5314.3	8	4.9291	3600.6	5	acyl carrier protein phosphodiesterase (acpD)	3.1.4.14	Unknown function	Enzymes of unknown specificity
DVU2135	1.9465	184.47		2.4908	282.75		2.1876	334.32		6.4924	4261.1	10	5.4001	2599.1	3.5	3.833	1424.8	4	hypothetical protein		Hypothetical proteins
DVU2416				2.2904	399.33		1.9621	318.05	2	6.4915	6003.9	2.5	6.7987	6089.2	4	3.9536	2834.4	2	conserved hypothetical protein		Hypothetical proteins	Conserved
DVU1612				10.231	1933	7.66667	4.0183	1437.3	4.33333	6.4792	9253	30.5	10.127	9237.3	16.5	6.867	5898.4	9	ACT domain protein		Unknown function	General
DVU2170	6.7869	218.7		2.8885	72.15		5.0186	186.27		6.4763	302.16		6.8828	441.19		3.2333	216.64		minor capsid protein C		Other categories	Prophage functions
DVU3217	2.8023	620.78		3.6016	697.02		3.6738	1102.8		6.465	5272		8.425	6535.9		5.418	4680		hypothetical protein		Hypothetical proteins
DVU2229	2.7754	342.57		2.6122	337.73		2.9749	346.22		6.458	3906.5		7.79	3177.8		6.5773	3257.3		chemotaxis protein MotA (motA-2)		Cellular processes	Chemotaxis and motility
DVU2420				2.2006	313.2	1.33333				6.4481	8717.9		4.8435	4742.6		3.0921	2332.1		conserved hypothetical protein		Hypothetical proteins	Conserved
DVU2585	3.9963	281.5		2.7418	214.42		5.1113	243.55		6.4329	1854.8	9.5	7.0207	1494.1	6	2.9233	659.4	2	methyl-accepting chemotaxis protein		Cellular processes	Chemotaxis and motility
DVU0072				3.7042	505.73	2.66667	4.4554	492.45	4	6.4195	4188.1	6.5	11.859	3955.5	7	5.1662	1700.4	4	glucose-1-phosphate cytidylyl-transferase	2.7.7.33	Cell envelope	Biosynthesis and degradation of surface polysaccharides and lipopolysaccharides
DVU1457	3.5923	678.25	5				5.5149	722.55	6.33333	6.4133	5799.8	9.5	8.4716	5248.8	15.5	4.0805	2804.7	7	thioredoxin reductase, putative		Energy metabolism	Electron transport
DVU2988	3.5401	433.73		2.3669	327.47		2.813	735.42		6.4126	4726.8		6.8514	4619.9		7.2031	9299.1		phage shock protein A (pspA)		Cellular processes	Adaptations to atypical conditions
DVU0461	2.2538	132.22		2.2132	197.93		2.7852	217.5		6.4123	6958.8	34.5	6.5132	4341.3	44.5	12.507	14802	31	predicted 3-dehydroquinate synthase		Amino acid biosynthesis	Aromatic amino acid family
DVU0519	4.1298	250.65		3.7117	193.3		8.6204	282.58		6.4058	5547.1	3	12.819	3477.1	3.5	4.4881	1510	3	flagellar hook-associated protein FlgK, putative		Cellular processes	Chemotaxis and motility
DVU1276	4.1485	244.88		3.2707	246.45		4.5198	278.27		6.3968	2161.8		8.4864	2080.1		3.2984	2421.8		hypothetical protein		Hypothetical proteins
DVU0810	12.216	212.35		3.5853	239.87		3.6045	229.15		6.3964	7654.7	6	10.027	5532.2	3	3.4157	3717.1	3	hypothetical protein		Hypothetical proteins
DVU1353	13.892	271.2		5.3812	255.37		6.2258	252.47		6.3956	1655.6		2.2606	1516		10.314	868.27		DNA polymerase III, alpha subunit (dnaE)	2.7.7.7	DNA metabolism	DNA replication, recombination, and repair
DVU2020	2.684	351.1		7.3471	322.82		7.5117	313.88		6.3885	1780.7		8.741	1390.3		6.1556	469.64		conserved hypothetical protein		Hypothetical proteins	Conserved
DVU0880	3.5251	955.6		2.745	785.22		4.1767	1438.9		6.3697	6158.8	8	7.5294	8010.6	9	7.7785	11536	18	hypothetical protein		Hypothetical proteins
DVU0300	3.4769	521.33		2.5823	242.9		2.909	206.65		6.3619	7271.8	1	8.9012	7812.1	1	3.0249	1094	1	radical SAM domain protein		Unknown function	Enzymes of unknown specificity
DVU1039	3.9281	738.7		3.3699	554.85		4.6188	784		6.3607	7847.6	29	6.2263	4446.6	18	3.9391	2375.1	11.5	lipoprotein, putative		Cell envelope	Other
DVU0327	3.7852	444.23		3.4184	456.25		5.0697	312.75		6.3571	3711.8		9.9821	2877.5		5.8179	1373		exopolysaccharide biosynthesis protein, putative		Cell envelope	Biosynthesis and degradation of surface polysaccharides and lipopolysaccharides
DVU1647	4.0055	241.7		8.7406	496.45		3.1138	205.72		6.3503	4333.3	1	7.747	2305.8	4	3.7652	1352.9	2.5	diaminopimelate decarboxylase (lysA-1)	4.1.1.20	Amino acid biosynthesis	Aspartate family
DVUA0037	2.6225	118.58		2.6061	65.7		2.3085	133.8		6.3455	624.9		4.3794	745.39		2.2283	549.71		sugar transferase domain protein		Unknown function	General
DVU1392	3.3251	471.1		3.0089	398.45		3.6101	374.3		6.3452	9786		8.885	7165.2		4.1964	4898.8		NLP/P60 family protein		Unknown function	General
DVU0856	8.2007	895.17	9	5.0716	672.95	6	3.331	363.38	4.66667	6.3354	3449.3	5.5	9.5125	3562.1	7	4.1245	1182.8	7.5	porphobilinogen synthase (hemB)	4.2.1.24	Biosynthesis of cofactors, prosthetic groups, and carriers	Heme, porphyrin, and cobalamin
DVU0084	3.1713	409.75					2.966	244.77		6.3049	5674.8	1	5.2816	3006.1	6	2.5361	1866.3	1	translation initiation factor, aIF-2BI family, putatives		Protein synthesis	Translation factors
DVUA0101	3.7474	297.57		2.943	271.2		2.4296	220.2		6.287	1702.3		6.1976	1098.8		2.4132	380.26		type III secretion protein, hrpY/hrcU family		Cellular processes	Pathogenesis
DVU2212	2.6959	449.33		2.189	500.72		2.2753	332.52		6.278	6186.4	1	5.2686	4266.2	2	3.2132	2171.9	1	conserved hypothetical protein		Hypothetical proteins	Conserved
DVU1479	2.1396	160.73		2.2417	173.47		2.62	439.4		6.2759	4225.2		10.25	4015		4.6052	4415.1		conserved hypothetical protein		Hypothetical proteins	Conserved
DVU2856	3.0446	186.53		4.3877	270.25		7.8296	307.82		6.2665	522.93		8.671	615.39		2.6241	428.49		conserved domain protein		Hypothetical proteins	Domain
DVU1208	6.6609	644.33		3.1675	339.55		4.6695	432.73		6.258	637.61	4.5	7.6558	620.82	1.5	4.8941	949.68	3	fatty acid/phospholipid synthesis protein PlsX (plsX)		Fatty acid and phospholipid metabolism	Biosynthesis
DVU1592	8.7941	424.17					13.871	674.48		6.2444	778.34		5.5714	1046.4		2.6719	995.69		arginine N-succinyltransferase, beta subunit, putative		Energy metabolism	Amino acids and amines
DVU0515	2.9882	310.35		2.5621	286.15		2.5462	227.85		6.2414	4941.4	1	7.6061	2861.4	1	4.7542	1872.2	1	flagellar L-ring protein FlgH (flgH)		Cellular processes	Chemotaxis and motility
DVU0198	6.52	190.8		2.8174	283.77		4.8155	253.42		6.2381	3047		9.1673	3656.9		2.3591	966.76		minor capsid protein C, degenerate		Disrupted reading frame
DVU2052	2.0988	154.25		2.4634	259.77		2.557	306.73		6.2372	3842.7	1	7.7536	2793.4	1	5.3392	2797.9	1	glycosyl transferase, group 2 family protein		Cell envelope	Biosynthesis and degradation of surface polysaccharides and lipopolysaccharides
DVU2159	3.284	284.43		3.5555	351.4		3.5195	192.35		6.205	180.95		4.5046	217.89		2.8884	222.67		hypothetical protein		Hypothetical proteins
DVU3350	3.038	668		2.1655	487.15		2.1215	335.9		6.1993	10351		6.1592	7047.9		3.4653	2747.3		iron-sulfur cluster-binding protein		Energy metabolism	Electron transport
DVU1849	1.6923	119.75		2.2937	162.35		1.8156	100.57		6.1978	12238		7.2016	11308		3.5368	5947.3		protein-L-isoaspartate O-methyltransferase (pcm)	2.1.1.77	Protein fate	Protein modification and repair
DVU0695	1.7843	113.58		2.0857	47.45		1.609	146.63		6.1921	9414.8		6.0857	9599.4		10.759	14846		hypothetical protein		Hypothetical proteins
DVU2247	7.4944	2415.9	8.66667				10.905	3139.3	7.66667	6.1801	4249.6	5	44.419	21619	6	39.919	21992	10	antioxidant, AhpC/Tsa family		Cellular processes	Detoxification
DVU2353	5.9549	271.75		2.2087	196.5		3.1225	166.2		6.177	6088.5		6.7599	4228.1		4.5097	4126.1		glycosyl transferase, group 2 family protein		Cell envelope	Biosynthesis and degradation of surface polysaccharides and lipopolysaccharides
DVU1121	2.1324	161.15		2.238	172.55		2.2003	233.5		6.167	6581.4	7	5.3339	3040	1.5	3.4738	3512.6	2	hypothetical protein		Hypothetical proteins
DVU0341							3.7352	257.85	6.33333	6.1567	1519.2	21	10.054	2599.4	14.5	3.538	957.28	12.5	3-deoxy-D-manno-octulosonate cytidylyltransferase	2.7.7.38	Cell envelope	Biosynthesis and degradation of surface polysaccharides and lipopolysaccharides
DVU0152	0.14278	73.55		3.4896	110.3		7.862	138.03		6.1557	1450.8		6.0363	1115.5		2.2279	743.44		phosphoenolpyruvate synthase-related protein		Unknown function	General
DVU0430	2.6801	259		2.5217	199.2		4.6113	685.78		6.1554	119.78		6.4875	132.8		4.524	191.74		Ech hydrogenase, subunit EchE, putative		Energy metabolism	Electron transport
DVU1051	3.2983	915.92		3.587	769.45		4.1904	732.07		6.1551	5557.4		10.254	7980.4		5.238	2991		cytochrome c-type biogenesis protein CcmE (ccmE)		Energy metabolism	Electron transport
DVU2913	3.5359	388.5		2.7466	412.6		2.9666	289.62		6.1431	4387.4	1	11.17	6948.3	9	8.8917	8974.2	1	lipoprotein, putative		Cell envelope	Other
DVU3228	6.4406	2049.1		5.5472	1258.6		4.3943	1577.6	1	6.1409	4112.3	3.5	7.2902	4625.5	4	7.2604	4067.1	4.5	chemotaxis protein CheY (cheY-3)		Cellular processes	Chemotaxis and motility
DVU0645	3.9666	256.02		2.4674	163.75		6.1752	105.22		6.1369	3424.9	18	5.1816	2522.3	7.5	2.6869	867.71	6.5	methyl-accepting chemotaxis protein		Cellular processes	Chemotaxis and motility
DVU1786	1.9777	141.05		2.5142	106.02		2.7237	151.8		6.1303	4196		10.123	2901.1		5.7352	3215.1		GGDEF domain protein		Unknown function	General
DVU0260	3.9813	1871.7		4.037	1249.5		3.5993	1650.2		6.1217	21605		6.3313	14732		2.8356	6035.1		response regulator		Regulatory functions	Protein interactions
DVU1408	2.9179	630.75		2.261	459.9		3.2176	477.15		6.1215	8473	7.5	6.0545	7162.3	4.5	5.4171	5235.3	3.5	hypothetical protein		Hypothetical proteins
DVU1438	3.695	601.45		7.2874	797.73		5.8991	747.03		6.1213	4013.7	5	10.07	2645.8	5	4.8832	1374.9	1	cobyrinic acid a,c-diamide synthase family protein		Unknown function	Enzymes of unknown specificity
DVU3348	2.5524	187.55		2.4642	99.525		1.8805	50.825	1.33333	6.0966	4444.7	16.5	7.8897	3852.1	28	4.014	1449.6	19	pyruvate ferredoxin/flavodoxin oxidoreductase, beta subunit,sputative		Energy metabolism	Anaerobic
DVU3144	5.5825	297.85		3.5816	142.45		8.2378	342.52		6.0912	1328.9		8.5498	969.22		4.1394	450.67		cytochrome c family protein		Energy metabolism	Electron transport
DVU2985	2.9617	226.32		2.6241	280.7					6.0703	5528.3	29	7.9214	4860.4	20	10.211	6212	5	3-isopropylmalate dehydrogenase (leuB)	1.1.1.85	Amino acid biosynthesis	Pyruvate family
DVU0123	0.91885	94.425		2.3451	125.18		2.3668	99.4		6.063	1178		8.884	1459.1		2.4809	293.14		membrane protein, putative		Cell envelope	Other
DVU3045	4.7364	294.3		5.074	331.18	4	7.7183	312.52		6.0515	4615.2	2	10.984	3502.4	4	3.1759	1104.4	1	sensory box histidine kinase/response regulator	2.7.3.-	Regulatory functions	Protein interactions
DVU1890	2.9395	364.4		2.8825	318.05		2.913	278.93	2.66667	6.045	1885.1	10	8.2453	2087.4	8	3.5286	1206.8	4.5	porphobilinogen deaminase (hemC)	4.3.1.8	Biosynthesis of cofactors, prosthetic groups, and carriers	Heme, porphyrin, and cobalamin
DVU3013	0.38113	40.075		2.3273	27.6		1.9993	24.35		6.0263	1638.1		9.2623	1703.1		3.4258	610.51		glycosyl transferase, group 2 family protein		Cell envelope	Biosynthesis and degradation of surface polysaccharides and lipopolysaccharides
DVUA0108	3.7254	723.88	1	2.832	443.1		3.4218	648.28		6.025	4455.8	1	6.2653	2935.1	2.5	4.4996	1765.9	1	hypothetical protein		Hypothetical proteins
DVU2580	5.8965	312.98		2.9613	116.37		3.7373	148.32		6.0197	3745.6	6.5	5.4208	3490.5	18	2.4115	2038.4	2	response regulator		Regulatory functions	Protein interactions
DVU2055	3.6871	268.07					6.9053	251.9		6.0147	2133.3	24	8.7086	1756.9	25.5	5.3543	1390	19	methionyl-tRNA synthetase (metG)	6.1.1.10	Protein synthesis	tRNA aminoacylation
DVU1024	2.755	159.03		2.4069	197.1		2.502	142.28		5.996	1782.7		6.5666	1874.4		2.7038	937.72		ribosomal large subunit pseudouridine synthase D/dephospho-CoA kinases(rluD/coaE)	4.2.1.70	Biosynthesis of cofactors, prosthetic groups, and carriers	Pantothenate and coenzyme A
DVU2527	2.3979	218.3		3.1484	285.7		1.5556	168.38		5.9756	2971.1	4	8.1149	2424.5	2.5	7.098	4307.4	2	transcriptional regulator, putative		Regulatory functions	DNA interactions
DVU1910	4.3056	213.1		2.5615	215.63		4.0083	293.25		5.9668	10691		12.579	8466.4		2.6508	4712.4		YjeF-related protein		Unknown function	General
DVUA0036	0.67714	62.825		3.8632	44.075		2.6863	76.975		5.9635	1101.6		4.9922	875.09		2.512	500.33		TPR domain protein		Unknown function	General
DVU0700	3.1476	184.2		2.7372	114.65		4.9853	339		5.9618	1155.6	9.5	5.7113	1011.5	5	2.7343	669.22	1.5	methyl-accepting chemotaxis protein		Cellular processes	Chemotaxis and motility
DVU3182	3.9194	235.22		3.3414	347.3		9.3233	371.13		5.9602	1893.4	9.5	6.5636	1329.7	5	3.2709	869.15	1.5	methyl-accepting chemotaxis protein DcrA (dcrA)		Cellular processes	Chemotaxis and motility
DVU3233	1.9795	188.1		2.6393	196.58		2.2863	220.58		5.9587	1967.9		8.8014	1520		3.8064	1289.9		flagellar biosynthetic protein FlhB (flhB)		Cellular processes	Chemotaxis and motility
DVU0459	2.7432	1336.5		4.2609	1710.3		3.5325	1362.5		5.9554	14885		5.7242	11529		10.798	15046		hypothetical protein		Hypothetical proteins
DVU1377	5.4178	762.65		4.6485	574.32	1.33333	2.8687	438.1		5.9533	3957.1		8.7772	4706.2		4.55	2548.1		acetolactate synthase, small subunit (ilvN-2)	4.1.3.18	Amino acid biosynthesis	Pyruvate family
DVU0183	0.42752	31.075		2.0692	36.7		3.3512	74.2		5.9419	762.38	10	4.6384	745.59	5	1.8736	753.25	1.5	methyl-accepting chemotaxis protein		Cellular processes	Chemotaxis and motility
DVU0823	4.5015	289.47	1	4.4058	431.67		5.664	277.6		5.9406	1133.3	6	6.5298	842.23	5	3.3503	743.61	1.5	arginine biosynthesis bifunctional protein ArgJ (argJ)		Amino acid biosynthesis	Glutamate family
DVU2881	2.3844	137.35		3.3175	169.43		3.7567	194.18		5.9381	448.7		6.3799	487.17		2.6272	462.42		phage/plasmid primase, P4 family		Other categories	Prophage functions
DVU0274	2.5686	646.4		2.9233	677.1		2.1258	382.2		5.9254	5450.1		4.8099	4455.6		3.1272	2224.8		hypothetical protein		Hypothetical proteins
DVU0613	1.8974	175.1		1.8992	198.7		1.6234	252.42		5.9151	141.51		3.8251	190.18		4.5204	154.89		hypothetical protein		Hypothetical proteins
DVUA0131	9.9121	734.55		3.8626	314.18		5.7812	318.72		5.9066	1550.6		5.5525	1189.8		3.2523	474.65		CRISPR-associated protein, CT1133 family		Hypothetical proteins
DVUA0076	4.9715	619.38		3.0043	327.63		4.857	504.2		5.9065	5718.1	2	9.1811	2950.6	3	1.9887	1543	1.5	ABC transporter, ATP-binding protein		Transport and binding proteins	Unknown substrate
DVU3097	8.89	348.93		6.3523	517.33		3.4503	433.18		5.8837	4493.6	2	11.324	3758.5	3.5	2.2947	1961.3	1	outer membrane efflux protein		Transport and binding proteins	Unknown substrate
DVU2291	6.8969	1272.4								5.8775	7048.4	28	8.052	6621	55	4.7556	3922.3	15	carbon monoxide-induced hydrogenase CooH, putative		Energy metabolism	Electron transport
DVU3355	3.5235	1160.3		4.3331	683.48		3.5912	903.45		5.8632	7202.8	12	8.9378	6229	18.5	2.425	1210.9	10	SPFH domain/Band 7 family protein		Unknown function	General
DVU0375	3.4276	230.62		3.245	159.7		6.7193	220.43		5.855	270.62		7.4711	283.93		4.3153	338.16		Glu/Leu/Phe/Val dehydrogenase family protein		Energy metabolism	Amino acids and amines
DVU1389	2.3159	152		2.4784	239.8		2.441	149.95		5.8508	2874.7		7.3043	2582		2.0272	1317.7		hypothetical protein		Hypothetical proteins
DVU2646	1.4201	102.75		2.5185	134.67		4.1105	97.5		5.8496	602.77		7.5272	610.03		3.9918	760.28		1-aminocyclopropane-1-carboxylate deaminase		Central intermediary metabolism	Other
DVU1500	2.1259	108.3		3.1111	221.02		5.2973	146.35		5.8396	621.21		7.2934	649.53		2.9426	944.9		major capsid protein, HK97 family		Other categories	Prophage functions
DVU2579	4.4089	594.97		4.6025	503.88		3.8153	491.95		5.8276	1698.3	5.5	8.4414	1421.6	4.5	4.4881	517.75	5	TPR domain protein		Unknown function	General
DVU2506	4.7392	358.95		2.6736	283.52	1	3.0891	245.97		5.8125	4683.2		7.677	3666.6		3.3586	2773.4		UDP-N-acetylmuramoylalanine--D-glutamate ligase (murD)	6.3.2.9	Cell envelope	Biosynthesis of murein sacculus and peptidoglycan
DVU1288	3.4395	1172.2		2.0603	298.1		3.1211	826.9		5.8048	9009.1		4.8665	4399.2		5.3177	3931.1		cytochrome c family protein		Energy metabolism	Electron transport
DVU3248	2.6958	270.87		3.0962	161.22		2.575	443.5		5.8047	1041.7		4.6888	1069.2		2.0933	524.71		AcrB/AcrD/AcrF family protein		Cellular processes	Toxin production and resistance
DVUA0087	2.0503	201.97	1.33333	5.3026	150.62		6.9155	122.23		5.8028	413.92		4.5703	447.05		2.4722	301.75		sensory box histidine kinase		Signal transduction	Two-component systems
DVU2559	5.7089	376.67		2.8754	295.38		9.1373	290.27		5.8017	328.79		3.2601	311.07		2.0024	290.5		adenosylmethionine--8-amino-7-oxononanoate aminotransferase (bioA)s	2.6.1.62	Biosynthesis of cofactors, prosthetic groups, and carriers	Biotin
DVU1494	1.8227	136.25		2.8898	176.98		4.1818	142.45		5.7997	401.14	1.5	5.0784	347.69	1	2.5725	597.04	1	hypothetical protein		Hypothetical proteins
DVU2670	5.6298	2032.9		2.8616	729.1		3.4003	763.6		5.7942	5055.3		7.8097	5759.3		5.9059	5571.5		hypothetical protein		Hypothetical proteins
DVU2747	0.62547	180.6		4.6556	242.95		5.496	257.7		5.7784	3580.4	1	11.059	3699	6	4.8852	1581	1	hypothetical protein		Hypothetical proteins
DVUA0069	3.6361	433.8		3.2752	307.63		4.4009	376.7		5.7781	4874.8		7.7372	2658.2		2.8663	1102.1		GtrA family protein, selenocysteine-containing		Cell envelope	Biosynthesis and degradation of surface polysaccharides and lipopolysaccharides
DVU0633	3.0901	242.9		3.5015	258.55		6.0969	161.45		5.7708	2355	1	7.2939	1522.9	1	3.9368	711.36	1.5	penicillin-binding protein		Cell envelope	Biosynthesis of murein sacculus and peptidoglycan
DVU1582	2.8606	211.72		2.3472	278.35		2.3168	215.08		5.7676	5803.5	1	8.353	5932.9	1.5	4.9247	5856.7	1	hypothetical protein		Hypothetical proteins
DVU1350	2.8782	231.73		2.4991	148.93		3.2014	105.48		5.7646	3074	2	9.1102	2672.7	3	4.0247	2086.7	1	deoxyxylulose-5-phosphate synthase (dxs)	4.1.3.37	Biosynthesis of cofactors, prosthetic groups, and carriers	Other
DVU2225	4.7673	389.3		4.1099	138.67		4.827	166.42		5.7614	3433.3	19.5	20.613	3442.1	24	8.4619	1835.9	19	acetyl-CoA carboxylase, carboxyl transferase, alpha/beta subunits	6.4.1.2	Fatty acid and phospholipid metabolism	Biosynthesis
DVU1784							3.4468	372.52	7.33333	5.7583	7425.9	29	6.5703	4311.5	23.5	2.9647	1912.7	42.5	oxidoreductase, short-chain dehydrogenase/reductase familys		Unknown function	Enzymes of unknown specificity
DVU2057	2.3576	112.6		2.4815	48.125		6.3356	112.32		5.7574	996.55	4	6.4039	986.07	3	3.7653	629.91	3.5	conserved hypothetical protein		Hypothetical proteins	Conserved
DVU0925	2.4719	213.43		2.3423	218.7		3.226	257.1		5.7553	3636		9.3123	3237.6		5.05	1846.4		glucose-1-phosphate thymidylyltransferase (rfbA)	2.7.7.24	Cell envelope	Biosynthesis and degradation of surface polysaccharides and lipopolysaccharides
DVU2584	2.5814	347.4		4.6601	493.17		5.7679	570.85		5.7544	2933.9		8.8914	2622.8		3.8807	942.68		transporter, CorA family		Transport and binding proteins	Cations
DVU0006	5.7002	2967					5.524	2643.8		5.7506	9384.2	5	7.0838	11989	2.5	3.4336	4446.4	1	universal stress protein family		Cellular processes	Adaptations to atypical conditions
DVU1805	4.1244	309.87		3.0672	244.5		4.428	308.87		5.749	5199.7	2.5	10.56	4327.7	5.5	2.9418	3499.3	1	GGDEF domain protein		Unknown function	General
DVU0935	5.4268	478.25	1.33333	3.8152	341.92		8.8548	695.27		5.7483	2353.1	20.5	6.6505	2045.4	17.5	4.7363	1568.1	9	methyl-accepting chemotaxis protein		Cellular processes	Chemotaxis and motility
DVU2098	2.8996	226.72		2.5795	220.32		5.0444	180.95		5.7265	363.89		5.3588	295.84		2.2369	474.15		carbon monoxide dehydrogenase (cooS)	1.2.99.2	Energy metabolism	Other
DVU2083	0.78063	228.57		3.325	165.8		3.3023	178.62		5.7228	212.57	2	3.3547	220.57	6.5	2.7899	195.27	1	GTP pyrophosphokinase (relA)	2.7.6.5	Cellular processes	Adaptations to atypical conditions
DVU1030	4.659	854.7		3.4091	617.1	2	4.8179	1415.4	3	5.7147	4409.7	124.5	6.9554	3566.6	93	11.231	6059	69	universal stress protein family		Cellular processes	Adaptations to atypical conditions
DVU0801	3.4274	111.6		2.3599	109.45		5.1785	68.925		5.7114	923.62		3.187	1061.8		1.9102	755.84		excinuclease ABC, C subunit (uvrC)		DNA metabolism	DNA replication, recombination, and repair
DVU1124	0.77553	9.15		2.3985	31.725		0.88133	45.025		5.7084	135.62		4.36	151.35		3.4554	242.61		hypothetical protein		Hypothetical proteins
DVU1426	2.3591	333.93		2.7066	534.5					5.7064	4207.8	2.5	4.9092	3032.6	3	3.9082	2426.3	2	glycine cleavage system H protein (gcvH)		Energy metabolism	Amino acids and amines
DVU1169	0.88891	120.2		2.8936	177.85		4.1832	149.38		5.7043	655.26		4.3409	755.23		3.5446	469.95		methyl-accepting chemotaxis protein		Cellular processes	Chemotaxis and motility
DVU2741	1.1305	66.375		2.5289	140.55		2.7115	248.82		5.703	534.24		4.9019	509.8		2.4724	757.83		high-affinity branched chain amino acid ABC transporter,sATP-binding protein (livG)		Transport and binding proteins	Amino acids, peptides and amines
DVU1941				2.9827	245.12	2.66667	2.8035	178.13	1.33333	5.6955	722.92		5.343	478.58		3.117	383.59		HAD-superfamily hydrolase, subfamily IIA		Unknown function	Enzymes of unknown specificity
DVU0191	1.9843	70.95		2.5938	106.02		2.6829	34.775		5.6939	562.06		6.2533	703.92		2.94	538.89		conserved hypothetical protein		Hypothetical proteins	Conserved
DVU2056	1.4754	53.125		1.8677	133.32		1.4001	141.5		5.6893	14628		5.7206	13280		4.5847	6368.4		hypothetical protein		Hypothetical proteins
DVU0938	2.3977	579.75		3.7126	739.42		3.0614	1102.8		5.6824	15581		10.123	15409		11.759	13138		isoamylase N-terminal domain protein		Unknown function	General
DVU1073	4.1302	258.95		3.0334	233.88		2.7298	289.47		5.682	1838.9		9.8596	2074.8		4.2609	1943.1		conserved domain protein		Hypothetical proteins	Domain
DVU1886	3.2923	615.13		2.4585	266.52		1.6887	284.4		5.6798	5253.5	3	5.1508	2895.9	4	2.5803	1392.5	2.5	hypothetical protein		Hypothetical proteins
DVU2368	3.5592	669.15		2.6896	479.3		2.7376	596.85		5.6765	5728.1	20	8.2804	5749.1	13	4.5034	2860.3	22	beta-hydroxyacyl-(acyl-carrier-protein) dehydratase FabZ (fabZ)s	4.2.1.-	Fatty acid and phospholipid metabolism	Biosynthesis
DVU2769	4.9126	776	4							5.6725	2943	14.5	6.5636	1606.6	54.5	3.5158	1556.4	1.5	conserved hypothetical protein		Hypothetical proteins	Conserved
DVU2695	1.7684	85.475		2.6221	78.65		1.5954	181.1		5.6666	168.61		5.1358	162.03		3.8268	208.22		conserved hypothetical protein		Hypothetical proteins	Conserved
DVU1981	1.9325	178.8					1.6893	226.2		5.6541	1934.2	2	6.9074	1274.7	5	3.8431	1052.9	2	conserved hypothetical protein		Hypothetical proteins	Conserved
DVU0862	3.212	267.25		2.4475	256.63		1.8445	208.8		5.6509	3438.5		6.8333	2121.2		2.9788	838.73		flagellar protein FliS/hypothetical protein, fusion		Cellular processes	Chemotaxis and motility
DVU3152	5.6543	510.85		6.386	555.52		10.708	983.75		5.6447	566.76		5.5773	548.65		1.7731	350.62		sensory box histidine kinase		Signal transduction	Two-component systems
DVU0716	2.4938	259.48		2.7276	125.98		1.888	78.1		5.6437	4823.2	7	7.2933	3583.2	14	6.0779	5991.3	4	branched-chain amino acid ABC transporter, ATP-binding proteins		Transport and binding proteins	Amino acids, peptides and amines
DVU2879	8.9943	226.27		3.25	284.95		8.0739	266.03		5.6427	698.88		6.4557	786.73		4.203	669.87		conserved hypothetical protein		Hypothetical proteins	Conserved
DVU0979	6.8006	892.35	42	6.518	740.43	24.6667	13.609	751.42	41.6667	5.6327	5513.9	35.5	8.2429	3603.1	45	3.5262	817.95	11.5	DAK1 domain protein		Unknown function	General
DVU1524	1.8486	119.52		2.6448	81.425		1.7216	118.08		5.6297	358.65		6.9947	337.08		2.5902	350.66		conserved hypothetical protein		Hypothetical proteins	Conserved
DVU2014				6.2275	701.47	5.66667	9.2318	1949.1	13	5.6297	2031.7	33	9.8798	1753.5	60.5	3.2087	1293.2	25.5	metallo-beta-lactamase family protein		Unknown function	Enzymes of unknown specificity
DVU1271	2.5358	206.6		3.5067	233.7		3.0397	193.93		5.6219	2673.4		7.9602	1709.9		5.1394	1994.1		general secretion pathway protein F, putative		Protein fate	Protein and peptide secretion and trafficking
DVU0105	3.3997	601.4		3.9393	419.95		2.868	212.38		5.6182	6741.5	3	9.5222	7031.4	2.5	5.7565	5094.5	3	glutamine ABC transporter, ATP-binding protein		Transport and binding proteins	Amino acids, peptides and amines
DVU0290	2.8244	411.5		2.5616	381		3.0856	358.93		5.6161	5396.5		5.7232	3337.4		3.1763	1665.3		lipoprotein, putative		Cell envelope	Other
DVU1970	2.091	215.75		2.0459	260.38		2.6044	250.9		5.6135	405.77		4.5205	427.26		2.4459	1165.5		response regulator		Regulatory functions	Protein interactions
DVU1768	2.2368	182.7		3.09	264.7		4.5742	189.85		5.61	1000.2		6.1216	866.48		2.1201	735.82		GTP-binding protein		Unknown function	General
DVU2323	2.9567	763.8		2.4822	445.27		3.1657	849.35		5.6053	6918		6.109	6348.6		4.7573	5030.7		hypothetical protein		Hypothetical proteins
DVU1523	1.6496	108.58		2.7875	207.02		3.5235	188.2		5.6035	460.83		5.4067	431.63		2.3357	356.28		hypothetical protein		Hypothetical proteins
DVU0556	2.3632	415.15		2.5923	496.35		2.4776	627.37		5.603	5013.3		4.9732	3814		4.1944	3899.5		ISDvu3, transposase OrfA		Other categories	Transposon functions
DVU2355	1.7557	90.925		2.3824	132.57		1.5705	167.9		5.5977	7597.3	1	7.3381	4845.7	4.5	3.8097	4084.4	1.5	tRNA (guanosine-2-O-)-methyltransferase (trmH)	2.1.1.34	Protein synthesis	tRNA and rRNA base modification
DVU2803	1.6062	163.05		2.5596	228.38		2.8248	143.83		5.5976	2759.6		9.8077	1961.7		3.9206	1059.8		membrane protein, putative		Cell envelope	Other
DVU1568				4.2707	779.25	11.6667	3.7313	1115.7	12.3333	5.569	9858.8	96	4.5638	5607	101	2.7977	3425.8	55	ferritin		Transport and binding proteins	Cations
DVU1307	5.4347	1845	4	4.7844	1183.5		3.5974	693.9	5.33333	5.5671	4101.1	38.5	7.0979	3738.3	47.5	7.4497	6465.7	30	ribosomal protein S19 (rpsS)		Protein synthesis	Ribosomal proteins: synthesis and modification
DVU1765	3.2073	273.5	2.66667	3.3567	407.1	2	3.2021	264.93	5	5.5643	1833.6	2.5	7.4512	1232.6	2.5	2.953	846.08	1	thiH protein, putative		Biosynthesis of cofactors, prosthetic groups, and carriers	Thiamine
DVU1900	3.3201	397.85		2.814	382.8		4.8669	291.78		5.556	5748.9	2	8.9729	5351.8	1	4.681	3896.6	1	conserved hypothetical protein		Hypothetical proteins	Conserved
DVU2942	4.8339	613.07	10	3.6492	480.88	3.33333	4.4068	396.75	6.66667	5.5559	3890.9	20	6.7227	2213.4	24	3.4843	2255.3	23.5	adenylosuccinate lyase (purB)	4.3.2.2	Purines, pyrimidines, nucleosides, and nucleotides	Purine ribonucleotide biosynthesis
DVU2533				4.3809	238.17	10.3333	7.239	296.88	7.33333	5.5492	3184.1	50.5	7.4128	1752	51.5	5.8248	2028.4	64.5	phenylalanyl-tRNA synthetase, beta subunit (pheT)	6.1.1.20	Protein synthesis	tRNA aminoacylation
DVU1156	1.7699	152.07		2.735	173.63		2.5869	235.73		5.5429	573.56		6.9216	525.62		2.6901	681.58		sigma-54 dependent transcriptional regulator, putative/responsesregulator		Regulatory functions	DNA interactions
DVU2599	2.1743	235.28		2.0064	181.3		1.2884	95.075		5.5412	170.01		3.9933	157.62		4.0166	237.07		hypothetical protein		Hypothetical proteins
DVU2979	2.5046	408.98		2.8222	354.43		3.9298	345.45		5.5349	6414.4	3	7.4487	5298.3	4.5	4.2091	3739.4	3	phosphatidylserine decarboxylase-related protein		Unknown function	General
DVU2369	3.5596	390.5		2.7879	288.7		4.447	219.67		5.5257	6780.9	4	10.218	6431.3	6.5	6.2426	2413.4	3.5	UDP-3-O-(R-3-hydroxymyristoyl)-glucosamine N-acyltransferase (lpxD)s	2.3.1.-	Cell envelope	Biosynthesis and degradation of surface polysaccharides and lipopolysaccharides
DVU3243	3.6101	345.73		3.2695	359.7		3.6933	275.38		5.5245	2853.7	6	9.3446	2310.4	3.5	7.7999	3130.8	5	dnaJ protein (dnaJ)		Protein fate	Protein folding and stabilization
DVU1741	1.2081	41.9		2.755	67.325		1.5462	67.325		5.5242	225.61		5.5463	293.5		5.2468	242.46		hypothetical protein		Hypothetical proteins
DVU0397	2.0794	119.72		2.0974	102.3		1.7728	115.83		5.5232	7795.3	2	8.0078	6132.6	4.5	4.8745	2639.9	1	rare lipoprotein A, putative		Cell envelope	Other
DVU1718	3.3193	268.02		3.7661	267.87		4.2586	233.88		5.5226	219.77		5.3225	275.44		3.2176	275.87		hypothetical protein		Hypothetical proteins
DVU1982	2.4637	112.32		2.8136	139.98		2.8932	157.93		5.5226	470.24		2.7084	538.74		1.5748	439.35		ATP-dependent RNA helicase RhlE (rhlE)		Transcription	Other
DVU1515	1.3047	52.7		1.875	34.5		6.4301	150		5.5203	270.83		4.1742	318.72		2.4694	335.55		type II DNA modification methyltransferase, putative		DNA metabolism	Restriction/modification
DVU1688	2.1613	191.25		2.5052	172.5		2.8603	235.05		5.5168	3438.8		7.2624	2914.3		3.5328	1525.2		1-acyl-sn-glycerol-3-phosphate acyltransferase, putatives		Fatty acid and phospholipid metabolism	Biosynthesis
DVU3155	3.81	277.45		3.806	225.95		3.9487	316.67		5.5154	1806.7	10.5	9.6115	2428.7	7.5	2.9091	1086.8	1.5	methyl-accepting chemotaxis protein DcrH (dcrH)		Cellular processes	Chemotaxis and motility
DVU2100	5.5609	2673.5		25.245	3968.3	11	12.053	7465.8	4.33333	5.5119	2138.4	79.5	7.3703	1823.7	88	3.3451	864.99	35	universal stress protein family		Cellular processes	Adaptations to atypical conditions
DVU3065	1.0245	149.45					4.914	167.15	1.66667	5.511	5383.9	2	13.04	4011	6.5	5.0461	2238.6	1.5	AMP-binding enzyme family protein		Unknown function	Enzymes of unknown specificity
DVU2515	4.411	716.5		5.4931	598.5		4.7871	773.85		5.5108	4389		10.264	4401.8		2.885	906.51		HD domain protein		Unknown function	General
DVU0384	2.2829	318.02		2.2487	250.77		1.5953	164.32		5.5094	5558.2	3.5	4.4959	2791.8	8	4.7999	3939.9	6	flavoredoxin (flr)		Energy metabolism	Electron transport
DVU0160	2.6178	186.45		2.2427	226.85		1.9608	149.93		5.5078	3971.8		5.8248	2562.6		2.587	1787		carbohydrate isomerase, KpsF/GutQ family		Energy metabolism	Sugars
DVU2026	1.9026	116.22		1.989	198.18		2.518	570.55		5.5019	5053.3		6.7319	3967		3.1263	1356.1		conserved hypothetical protein		Hypothetical proteins	Conserved
DVU1584	2.5895	270.77		3.9809	206.97		3.44	178.4		5.4991	2147.7		14.093	3335.8		8.292	2916.7		sigma 70 family protein		Transcription	Transcription factors
DVU2684	2.395	209.05		2.3653	129.75		2.3872	268.8		5.494	4540.8		7.5242	3938.5		5.1146	2831.7		hypothetical protein		Hypothetical proteins
DVU1284	5.3038	248		4.2067	236.6		9.1944	235.52		5.4938	1074.3		3.639	1038.9		1.922	675.61		primosomal protein n (priA)		DNA metabolism	DNA replication, recombination, and repair
DVU0963	2.6355	393.1	1	2.9799	345.25		4.4225	618.38	1.66667	5.4918	4784.2	1	6.911	3836.4	3	3.1207	1989.8	2	GTP cyclohydrolase I family protein		Unknown function	Enzymes of unknown specificity
DVU1816	2.8937	401.2		2.6448	188.2		2.429	329.05		5.4838	8618.9		6.8138	6617.1		4.5216	3829.8		conserved hypothetical protein		Hypothetical proteins	Conserved
DVU0631	6.7281	321.5		3.2112	299.6		2.9427	228.27		5.4835	4006.4	5.5	6.7492	2519.2	13.5	1.9213	1081.9	7	conserved hypothetical protein		Hypothetical proteins	Conserved
DVU2113	1.6395	159.65		2.8978	82.825		5.1038	200.75		5.4804	2376.4		6.7062	1171.7		2.1982	1110.8		xanthine/uracil permease family protein		Transport and binding proteins	Nucleosides, purines and pyrimidines
DVU1868	6.7492	601.65	6.66667	8.7757	909.55	9.66667	3.8759	1056.4	7	5.4781	3639.5	9	6.6598	2695.1	18.5	3.478	1490.5	20.5	dihydrodipicolinate synthase (dapA)	4.2.1.52	Amino acid biosynthesis	Aspartate family
DVU0741	2.3551	217.02		2.2844	229.15		2.0382	274.25		5.4741	5459.2	3.5	5.1522	3333.4	4	3.0238	1684.8	1	hypothetical protein		Hypothetical proteins
DVU0414	3.1386	229.4	5.33333	3.1194	180.9	8	4.2472	209.1	6.66667	5.4718	3694	50	9.0869	2421.9	64.5	4.5856	1719.6	33.5	NADP-dependent malic enzyme-related protein		Unknown function	General
DVU1496	2.1857	171.1		2.1819	163.7		1.7329	102.25		5.4652	228.8		5.1283	250.16		3.0763	295.55		hypothetical protein		Hypothetical proteins
DVU1761	1.6653	80.025		1.8699	126.52		1.6411	216.7		5.4589	146.68		4.0576	216.79		4.6155	186.46		hypothetical protein		Hypothetical proteins
DVU1954	2.2931	145.17		1.9345	108.65		1.66	166.47		5.4578	18430		7.8999	15608		7.1225	9489.3		nicotinate (nicotinamide) nucleotide adenylyltransferase (nadD)s		Biosynthesis of cofactors, prosthetic groups, and carriers	Pyridine nucleotides
DVU1366	3.3151	392.13	1	2.5231	287.77		2.8043	309.08		5.4467	3690.7	2	7.6091	3471.2	2	4.3499	2731.3	3	lipoprotein, putative		Cell envelope	Other
DVU0524	2.8892	822.95		3.0087	964.97		2.1686	658.9		5.4373	7147		6.0225	8109.1		4.4941	6769.8		hypothetical protein		Hypothetical proteins
DVU1847	3.7606	370.95					4.816	342.55		5.4256	2652.5	13	7.4349	1619.3	22.5	4.0423	1692.5	13.5	conserved hypothetical protein		Hypothetical proteins	Conserved
DVU3371	3.5638	118.42		1.8228	85.775		3.5222	81.15		5.4235	2477.4	11.5	4.2857	2428.7	13	3.3036	847.04	1	5-methyltetrahydropteroyltriglutamate-homocysteinesS-methyltransferase (metE)	2.1.1.14	Amino acid biosynthesis	Aspartate family
DVU1368	6.1231	432.63	3	5.0897	453.42	5	11.484	468.12	2.66667	5.421	2183.3	49.5	11.051	2708.8	41.5	5.4728	1760.3	19.5	rhodanese-like domain protein		Unknown function	General
DVU1207	3.4775	425.78		2.2641	249.22		3.6182	189.02	1.33333	5.4099	4545.9	9.5	5.8965	4274.6	13.5	7.7964	8564.8	7.5	3-oxoacyl-(acyl-carrier-protein) synthase III (fabH)	2.3.1.41	Fatty acid and phospholipid metabolism	Biosynthesis
DVU2882	4.3673	245.45		3.0161	287.8		4.0091	135.6		5.4032	7649.3		6.4484	6149		2.6652	2466		folylpolyglutamate synthase (folC)	6.3.2.17	Biosynthesis of cofactors, prosthetic groups, and carriers	Folic acid
DVU0819	3.8496	610.27		3.7491	743.88		4.5271	684.83		5.4022	2480		8.247	2816.5		3.8252	1281.2		FMN reductase, NADPH-dependent		Energy metabolism	Electron transport
DVU0822	2.8329	242.58		2.1017	160.15		7.1764	539.83		5.4012	4674		7.1098	1607.1		3.7487	1766.5		hypothetical protein		Hypothetical proteins
DVU1412	3.9348	638.17		3.1036	298.23	1	5.3084	512.53	1.33333	5.3952	5136.9	3.5	9.0197	5157.6	4.5	3.0382	2210.9	2.5	D-isomer specific 2-hydroxyacid dehydrogenase family proteins		Unknown function	Enzymes of unknown specificity
DVUA0071	11.293	671.87		3.4809	282.52		5.9188	378.95		5.3914	6631	4.5	12.653	7139.7	12.5	4.416	3762.8	3	glycosyl transferase, group 1/2 family protein		Cell envelope	Biosynthesis and degradation of surface polysaccharides and lipopolysaccharides
DVU0310	2.4472	211.02		2.6433	231.25		5.1303	237.9		5.3879	2903.3		7.4684	2820.8		5.377	1950		flagellum-specific ATP synthase FliI (fliI)	3.6.3.14	Cellular processes	Chemotaxis and motility
DVU1418	1.5653	140.42		3.6199	279.32		5.0511	167.25		5.3872	2609.5		8.3509	3188.2		1.571	2096.2		sensory box histidine kinase	2.7.3.-	Signal transduction	Two-component systems
DVU2611	1.6597	104.6		2.793	98.475		2.8705	165.67		5.3815	170		4.5183	207.67		3.8445	217.52		conserved hypothetical protein		Hypothetical proteins	Conserved
DVU1844	3.226	614.95		3.2367	670.05		2.345	408.2		5.3793	6830.7	2	5.9691	5903.4	2.5	5.1203	3983.1	1	septum formation initiator family protein		Cellular processes	Cell division
DVU0227	3.5516	996.07	12	2.3185	488.8	4.33333	3.3138	813.7	12	5.3744	6643	11	4.5251	3538.7	19.5	3.0878	2006	3	conserved hypothetical protein		Hypothetical proteins	Conserved
DVU2644	0.95836	43.5		2.4605	175.57		3.1763	219.12		5.3744	2883.7		6.421	1361.8		2.8721	1221.8		transcriptional regulator, GntR family		Regulatory functions	DNA interactions
DVU2878	0.62521	35.3		2.5118	8.025		4.7302	124.5		5.3737	765.42		5.8692	795.04		1.9285	457.6		adenine specific DNA methyltransferase, putative		DNA metabolism	Restriction/modification
DVU3270	18.094	3877.7		5.5044	1145.7		13.899	3897.1		5.3695	5583		8.9056	3622.7		4.6544	1394.7		cytochrome d ubiquinol oxidase, subunit II (cydB)	1.10.3.-	Energy metabolism	Electron transport
DVU1807	2.9478	238.2		2.8164	318.8		2.486	192.05		5.3655	2620.4		5.967	2147		2.3988	1296.9		nicotinate-nucleotide pyrophosphorylase (nadC)	2.4.2.19	Biosynthesis of cofactors, prosthetic groups, and carriers	Pyridine nucleotides
DVU3042	3.3135	766.92		2.9123	587.42		2.8943	575		5.3523	8136.6	1	4.7009	4766.4	1	3.2979	2105.5	1	lipoprotein, putative		Cell envelope	Other
DVU2300	3.6082	1365.2		2.2079	739.25		2.9681	986.13		5.3521	16753		6.1479	14432		10.323	18844		hypothetical protein		Hypothetical proteins
DVU2544	2.7639	249.68		2.3139	243.58		2.4439	331.52		5.3394	2708.5		6.0563	2024.7		2.8798	1433.2		iron-sulfur cluster-binding protein		Energy metabolism	Electron transport
DVU2367	2.7314	397.73		2.3711	339.18		2.3801	288.77		5.3389	5817.2	19	5.5638	4402.9	16	7.4585	4331.8	18	acyl-(acyl-carrier-protein)--UDP-N-acetylglucosaminesO-acyltransferase (lpxA)	2.3.1.129	Cell envelope	Biosynthesis and degradation of surface polysaccharides and lipopolysaccharides
DVU2174	2.2789	208.88		2.0816	193.5		2.6417	471.8		5.3362	2841.4		6.8286	2992.2		4.428	2595		hypothetical protein		Hypothetical proteins
DVU1789	2.041	171.35		2.4935	127.15		3.1359	127.05		5.3308	2302.3	2	6.7874	2258.7	2	3.4182	1841	1	DNA primase (dnaG)	2.7.7.-	DNA metabolism	DNA replication, recombination, and repair
DVU2721	1.1983	29.3		3.6081	30.95		3.3433	47.85		5.3277	566.87		6.6913	766.29		5.12	764.15		phage tail tape measure protein, TP901 family, putatives		Other categories	Prophage functions
DVU0832	2.1958	136.48		2.537	193.38		1.5877	193.2		5.3259	5413.3		7.3287	3518.9		1.8729	3005.6		tetrapyrrole methylase family protein		Unknown function	Enzymes of unknown specificity
DVU1827	2.3453	140.58		2.1054	104.42		2.1337	162.3		5.3237	1793.4	3.5	7.1441	1946.3	4	4.3916	1492.1	2	acetylornithine deacetylase/succinyl-diaminopimelate desuccinylasesfamily protein		Amino acid biosynthesis	Aspartate family
DVU2202	1.1819	83.45		3.7114	118.4		4.8373	114.48		5.3213	2849		10.505	2879.5		3.3097	1474.9		transglycosylase SLT domain/bacterial extracellular solute-bindingsdomain protein		Unknown function	General
DVU1889	2.515	196.05		2.2124	209.63		1.9058	141.75		5.3156	3931.7		6.4345	4560		5.1168	2275		phosphoheptose isomerase (gmhA)		Cell envelope	Biosynthesis and degradation of surface polysaccharides and lipopolysaccharides
DVU0606	5.4011	1188		2.9031	395.38		4.19	489.3		5.3149	9295.2		8.415	10084		8.1267	17085		transcriptional regulator, ArsR family/methyltransferase, UbiE/COQ5sfamily		Regulatory functions	DNA interactions
DVU0483	2.135	38		2.5002	107.92		3.568	67.825		5.3113	2379	2.5	6.2315	1778.1	6.5	2.4802	1364.1	9	DNA mismatch repair protein MutL, putative		DNA metabolism	DNA replication, recombination, and repair
DVU3116	4.3495	326.45		4.4648	257.45		5.7605	248.05		5.311	2861.3		11.059	3127.9		5.9161	2449.2		peptide chain release factor 3 (prfC)		Protein synthesis	Translation factors
DVU0226	7.984	779.12		3.7154	428.37		5.6239	408.15		5.3107	4785.6		8.6438	3169.2		3.1638	1501.9		hypothetical protein		Hypothetical proteins
DVU0281	3.2899	449.9		2.3247	353.3		2.4384	303.55		5.31	9435	1	8.8807	9091.9	2.5	3.677	3721.3	1	exopolysaccharide biosynthesis protein, putative		Cell envelope	Biosynthesis and degradation of surface polysaccharides and lipopolysaccharides
DVU1339	2.988	348.15		2.7878	411.25		2.3366	287.95		5.3095	3059.6		6.8601	2834.5		2.959	671.87		lipoprotein, putative		Cell envelope	Other
DVU3240	3.5182	490.73		4.5946	678.5		5.5023	484.3		5.3092	4166.6		9.8301	4613.8		3.644	2657		peptidase, M23/M37 family		Protein fate	Degradation of proteins, peptides, and glycopeptides
DVU2602	2.674	357.65		2.1141	239.6		2.3179	291		5.309	209.94		4.3515	230.73		4.0405	252.41		conserved domain protein		Hypothetical proteins	Domain
DVU1502	0.22923	18.25		2.6304	40.375		4.6143	80.675		5.3089	527.02		5.7217	529.58		2.859	686.41		portal protein, HK97 family		Other categories	Prophage functions
DVU2871	6.7891	214.8		2.7766	164.25		5.0885	205.52		5.3069	1556.5		8.0879	1497.6		2.9013	1074.5		minor capsid protein C		Other categories	Prophage functions
DVU0265	14.35	2162.6		5.1043	942.48		4.3888	2600.7		5.3062	10115	14.5	7.4344	7625	23.5	5.6721	6098	8.5	membrane protein, putative		Cell envelope	Other
DVU0681	1.7564	110.25		3.3572	163.58		5.3434	107.18		5.3	1222.2		9.9465	948.15		2.3468	590.93		sensor histidine kinase/response regulator	2.7.3.-	Regulatory functions	Protein interactions
DVU2944	4.5649	334.37		3.417	178.55		2.8031	185.65		5.2985	3291.2		13.078	3518.6		3.736	1887.3		ErfK/YbiS/YcfS/YnhG family protein		Unknown function	General
DVU1293	2.0075	182.38		2.0833	313.55		2.3011	328.15		5.298	5338.7		4.55	3366.2		3.0796	2139.9		hypothetical protein		Hypothetical proteins
DVU2800	2.941	290.52		4.4662	401.55		6.4513	92.05		5.2969	3539.5		15.631	3902.7		5.0507	1709		heavy metal translocating P-type ATPase	3.6.3.-	Transport and binding proteins	Cations
DVU0975	2.676	344		2.1884	352.85		3.3638	402.97		5.2966	4846		7.0797	6861.3		5.1655	4218.5		conserved hypothetical protein		Hypothetical proteins	Conserved
DVU1520	3.026	285.63		2.3224	186.05		7.4034	427.85		5.2957	2536.7		7.1029	1563		3.4088	983.11		hypothetical protein		Hypothetical proteins
DVU1908	3.2476	651.2	2.66667				4.2077	841.02	3	5.2898	5249.6	9.5	5.041	3677.8	10	3.8699	2376.8	10	pyridoxal phosphate biosynthetic protein PdxJ (pdxJ)		Biosynthesis of cofactors, prosthetic groups, and carriers	Pyridoxine
DVU2285	2.5095	296.12		3.0222	163.27		5.9468	93.75		5.2761	8649.7	1.5	6.8915	2691.1	10	1.7214	2021.7	1.5	L-lactate permease family protein		Transport and binding proteins	Carbohydrates, organic alcohols, and acids
DVU1010	1.576	73.025		1.8895	76.7		1.5048	159.42		5.2723	8826.7		15.037	25745					hypothetical protein		Hypothetical proteins
DVU2306	3.3741	280.9		3.1143	169.02		6.7611	234.95		5.2721	4177.5		5.9419	2937.8		4.4731	1069		phosphate transporter family protein		Transport and binding proteins	Anions
DVU3360	2.4987	289.83		2.6475	313.7		2.3466	287.77		5.2714	1866.9		6.3312	1354.4		2.5268	793.73		ParB family protein		Cellular processes	Cell division
DVU1074	4.0079	3236.6		4.7407	1341.8		4.2509	1608.6		5.2521	7918.4		3.2881	2290.8		3.6619	2718.7		ribosomal protein L34 (rpmH)		Protein synthesis	Ribosomal proteins: synthesis and modification
DVU3194	6.4112	492.22		6.5478	420.75		5.1923	326.45		5.2519	3789.2	17.5	15.369	4683.2	21	11.002	5603.2	11	GTP-binding protein EngA (engA)		Unknown function	General
DVU2015	1.7754	160.73		1.8512	170.07		2.6792	748.6		5.2473	12079		4.2938	8996.6		3.6182	3927.1		hypothetical protein		Hypothetical proteins
DVU2532	2.3379	458.82		2.5047	393.63		1.7839	249.1		5.2424	9180	2	6.3582	9377.4	2	6.524	9611.7	1	transcriptional regulator, MerR family		Regulatory functions	DNA interactions
DVU2227	3.5756	1905.2		2.5733	726.37		3.1178	1266.7		5.2421	11470		4.0809	6729.8		4.1091	5836.9		hypothetical protein		Hypothetical proteins
DVU1936	2.2373	205.75		2.7064	215.4		2.0345	220.07		5.2417	3496.8	2.5	8.4817	2573.2	4.5	3.0582	1012.3	1	phosphonate ABC transporter, ATP-binding protein		Transport and binding proteins	Other
DVU0409	2.0041	129.68		2.149	84.5		1.9972	206.3		5.2334	6477.6	3	3.822	4612.8	3.5	4.9313	5249	1	hypothetical protein		Hypothetical proteins
DVU2313	3.3838	840.78		3.0885	732		3.3515	777.95	1.66667	5.2286	3949.9	2.5	6.2549	3968.2	11	2.994	1293.2	2	6-phosphogluconolactonase (pgl)	3.1.1.31	Energy metabolism	Pentose phosphate pathway
DVU1195	2.8944	323.42		2.3358	245.43		2.3017	237.37		5.2242	8817.6	2	6.9237	5567.1	2.5	5.728	4862.9	1.5	lipoprotein, putative		Cell envelope	Other
DVU3140	2.4556	200.65		3.1371	231.42	1	4.7068	260.7		5.224	2463.3	2	10.012	1931.5	5	6.2234	1441.9	1.5	capsular polysaccharide transport protein, putative		Cell envelope	Biosynthesis and degradation of surface polysaccharides and lipopolysaccharides
DVU2817	8.1475	256.85		4.5566	288.77		3.2397	193.38		5.2239	792.69		5.0072	763.62		4.8182	5641.4		multidrug resistance protein		Transport and binding proteins	Other
DVU0796				4.0061	442.88		2.9547	366.63	1	5.2231	2987.7		5.9208	2040.3		5.2032	3546.1		histidinol dehydrogenase (hisD)	1.1.1.23	Amino acid biosynthesis	Histidine family
DVU0704	2.0497	241.53		2.6125	218.55		2.2717	297.97		5.2218	4893.1	9.5	6.3994	2542.4	11.5	4.6727	2364	15	signal peptidase I (lepB)		Protein fate	Protein and peptide secretion and trafficking
DVU2073	3.8005	611.85		3.4097	587.9		3.1113	642.27		5.2149	2527.3	28	6.2934	1505.1	38	16.425	9991	14	chemotaxis protein CheY (cheY-2)		Cellular processes	Chemotaxis and motility
DVU2970	4.4086	261.33		5.746	232.7	1	7.6211	201.38		5.2135	1701.3		10.968	1311.8		5.6848	497.12		acetyltransferase, GNAT family		Unknown function	Enzymes of unknown specificity
DVU0720	3.9426	285.38		3.1172	328.15		6.4172	319.97		5.2084	3856.2		7.4851	2406.3		4.2484	2771.1		HAMP domain protein		Unknown function	General
DVU1862	3.0227	280.55		2.7886	261.6		4.1621	372.88		5.207	4148.2		8.5305	3318.8		4.0615	3350.8		GGDEF domain protein		Unknown function	General
DVU3395	4.2851	324.93		4.2058	274.02		8.248	322.67		5.2065	4123.4	1.5	18.017	6551.2	4	19.875	10158	1.5	peptidase, M23/M37 family		Protein fate	Degradation of proteins, peptides, and glycopeptides
DVU1708	2.5361	186.38		2.7053	232.93		3.7709	820.75		5.2046	1048.3		6.5388	746.01		2.818	643.15		conserved hypothetical protein		Hypothetical proteins	Conserved
DVU1757	1.1959	99.55		2.4396	149.55		2.5085	131.25		5.2021	476.1		5.9459	487.31		2.0479	559.02		site-specific recombinase, phage integrase family		DNA metabolism	DNA replication, recombination, and repair
DVU2896	0.65807	171.13		11.778	225.45		4.1682	207.17		5.2021	2906.1	1	9.1655	2086.2	1	5.1367	810.56	1	TPR domain protein		Unknown function	General
DVU2122	1.8622	163.95		2.8887	82.025		2.4706	61.875		5.1968	258.12		5.9485	309.85		3.7095	253.43		type II/IV secretion system protein		Protein fate	Protein and peptide secretion and trafficking
DVU0842	2.0817	350.17		1.9635	196.27		1.5339	260.35		5.1913	6449.5	1.5	4.1002	5270.9	1.5	3.3532	2130.9	1	hypothetical protein		Hypothetical proteins
DVU2125	2.5698	37.825		2.4171	81.35		2.3451	88.925		5.1837	432.85		5.2822	681.84		4.1473	345.13		TPR domain protein		Unknown function	General
DVU1921										5.179	2866.8	2.5	8.2706	3467	2.5	3.8226	1613.3	2	periplasmic [NiFe] hydrogenase, small subunit, isozyme 1 (hynB-1)s	1.18.99.1	Energy metabolism	Electron transport
DVU2186	2.2032	74.025		2.4531	82.65		2.9842	141.25		5.1765	315.21		4.8256	333.66		2.7805	317.27		hypothetical protein		Hypothetical proteins
DVU0242	2.969	573.65		4.0383	779		2.8364	247.3		5.1674	11385	18.5	7.3755	8167	15.5	3.0135	4197.2	14.5	SEC-C motif domain protein		Unknown function	General
DVU2211	0.75278	123.12		3.2077	102.47		3.0684	172.02		5.1631	2977.7		4.3901	2531.3		3.2953	1693.2		hypothetical protein		Hypothetical proteins
DVU2072	2.3798	331.2		7.1306	338.48		10.783	445.55		5.1612	563.36	22	6.4444	523.86	26.5	14.603	1209.1	14	chemotaxis protein CheA (cheA-3)	2.7.3.-	Cellular processes	Chemotaxis and motility
DVU1038	3.5132	573.58		3.0263	371.65		3.5052	525.95		5.1579	7246.4		6.224	4756		4.9203	3454		phosphoribosylformimino-5-aminoimidazole carboxamide ribotidesisomerase (hisA)	5.3.1.16	Amino acid biosynthesis	Histidine family
DVU0525	2.7915	276.32		2.6819	270.6		2.8886	170.65		5.1564	461.26		3.6455	539.62		2.1331	852.05		transcriptional regulator, MarR family		Regulatory functions	DNA interactions
DVU1649	5.0854	332.27		4.1266	372.98		5.6568	353.33		5.1555	3769.8		4.1982	3653.2		1.8849	1452.4		DNA mismatch repair protein MutS (mutS)		DNA metabolism	DNA replication, recombination, and repair
DVU2138				2.493	208.37	3.33333	2.5723	325.65	4	5.1477	5150	14.5	5.9047	3840.1	17	3.7705	2442.1	15	conserved hypothetical protein		Hypothetical proteins	Conserved
DVU1960	2.5585	155.28		2.5089	261.75		4.427	140.3		5.1473	1975.4		4.9363	1604.6		3.3579	1694.8		chemotaxis protein CheA (cheA-2)		Cellular processes	Chemotaxis and motility
DVU0039	2.4816	196.95		2.0113	177.25		2.5911	175.68		5.1424	590.76		3.5676	611.67		2.8767	513.39		C4-type zinc finger protein, DksA/TraR family		Unknown function	General
DVU2514	6.0574	885.9	4.66667				6.6897	1160.8	20	5.1421	3145.4	23	7.8676	2788.8	32.5	3.3469	798.71	18.5	pyruvate kinase (pyk)	2.7.1.40	Energy metabolism	Glycolysis/gluconeogenesis
DVU2841	2.9361	193.32		2.3254	180.7		9.4567	374.9		5.137	1861.3		6.5612	2365		3.1505	1315.3		type II restriction endonuclease, putative		DNA metabolism	Restriction/modification
DVU1363	3.0164	357.82		3.0848	436.55		3.0482	300.3		5.1342	6310.8		7.1282	5087.7		2.9051	1375.3		dTDP-4-dehydrorhamnose reductase (rfbD)	1.1.1.133	Cell envelope	Biosynthesis and degradation of surface polysaccharides and lipopolysaccharides
DVU0828	2.5271	342.45		2.9206	310.15		1.6583	229.8		5.1251	3951.1	4	5.9263	2511.3	2.5	3.4209	1158.8	3	SsrA-binding protein (smpB)		Protein synthesis	Other
DVU0656	2.2663	345.67		2.0065	404.35		1.5271	204.15		5.1181	7587.3	1	4.5292	6288.7	1	3.2792	2934.4	1	conserved hypothetical protein		Hypothetical proteins	Conserved
DVU2667	5.8475	848.4	71	3.7057	453.45	36.3333	3.0246	455.5	43	5.1021	1265.1		6.3643	1110.9		3.0817	763.31		phosphate ABC transporter, periplasmic phosphate-binding proteins(pstS)		Transport and binding proteins	Anions
DVU2406	1.3936	44.7		2.1941	42.925		1.4696	130.93		5.0971	7591		4.6524	6089.4		3.7417	2870		hypothetical protein		Hypothetical proteins
DVU2305	2.2624	264.43		2.4503	210.85		2.4579	382.3		5.0878	2129.4	10	6.7639	2326.8	6	2.9926	784.19	3.5	conserved hypothetical protein		Hypothetical proteins	Conserved
DVU1467	6.6723	498.3		3.8156	441.57		3.7464	297.2		5.0863	2520.6	3	6.2651	1513.4	1.5	2.7791	1314.9	4	heat shock protein HslVU, ATPase subunit HslU (hslU)		Protein fate	Protein folding and stabilization
DVU3146	2.1285	129.33		2.0705	147.52		1.2965	67.825		5.0845	8002.5		7.7341	8444.5		4.4654	5077.2		hypothetical protein		Hypothetical proteins
DVU1808	1.3583	64.9		2.127	152		1.5498	72.75		5.0825	3628.9	2	5.6215	2403.5	2.5	2.4617	1476.1	1	quinolinate synthetase complex, subunit A (nadA)		Biosynthesis of cofactors, prosthetic groups, and carriers	Pyridine nucleotides
DVU1428	3.781	351.35	4.33333	2.8218	277.4		6.6654	441.7	3.33333	5.0756	2740.8	2	7.7364	3681.6	7	2.9567	1971.3	3	phosphoglucomutase, alpha-D-glucose phosphate-specific (pgm)s	5.4.2.2	Energy metabolism	Sugars
DVU0206	1.8444	160.2		2.7869	250.1		2.2058	223.53		5.0732	1490.2		8.5052	1711.5		2.6617	649.31		hypothetical protein		Hypothetical proteins
DVU0496	3.2035	175.15					3.8616	179.25		5.0725	1057.7	1	5.0635	1168.6	2.5	2.0257	638.17	1	DNA polymerase I (polA)	2.7.7.7	DNA metabolism	DNA replication, recombination, and repair
DVU0059	1.1654	87.65		2.4411	52.775		3.3544	75.175		5.0706	808.71		1.8984	680.52		1.8259	859.23		AcrB/AcrD/AcrF family protein		Cellular processes	Toxin production and resistance
DVU1740	2.0059	222.8		2.036	204.07		0.9694	79.35		5.0693	168.08		3.789	237.27		3.6256	184.36		hypothetical protein		Hypothetical proteins
DVU3110	0.534	66.625		2.3213	102.4		2.5312	50.8		5.0678	1259		5.3077	829.42		3.1558	1134.5		L-aspartate oxidase, putative		Biosynthesis of cofactors, prosthetic groups, and carriers	Pyridine nucleotides
DVU1282							6.4433	333.17	2.66667	5.0658	1829.2	6	7.2681	1658.4	11.5	3.2627	927.75	3.5	phosphoglucosamine mutase (glmM)	5.4.2.-	Cell envelope	Biosynthesis of murein sacculus and peptidoglycan
DVU1974	2.5027	229.78		2.8718	188.88		3.1183	180.32		5.0643	1169.2		8.0079	1632.1		4.4023	712.22		pyridine nucleotide-disulfide oxidoreductase		Unknown function	Enzymes of unknown specificity
DVU0450	2.5051	256.95		2.3095	212.25		1.7741	156.35		5.0616	3384.6	1	5.9755	2117.9	1	3.3816	1458.1	1	riboflavin biosynthesis protein RibF (ribF)		Biosynthesis of cofactors, prosthetic groups, and carriers	Riboflavin, FMN, and FAD
DVU3376	1.2036	93.85		2.9686	62.9		5.1083	169.05		5.0611	1675		9.8327	1577.6		4.2615	1043.2		sulfatase family protein		Unknown function	Enzymes of unknown specificity
DVU0457	1.8431	86.025		2.1807	73.5		2.3076	108.8		5.057	579.16		4.7346	818.69		2.6146	668.56		EAL domain protein		Unknown function	General
DVU2185	0.27262	36.675		2.9988	91.225		3.2024	92.35		5.0545	361.63		5.3633	522.41		2.2564	366.28		terminase, large subunit, putative		Other categories	Prophage functions
DVU2464	4.5375	366.05		3.5279	310.4		5.8031	345.05		5.0504	1851		7.147	1697.2		2.5898	725.12		hypothetical protein		Hypothetical proteins
DVU0974	2.4723	436.25		2.323	572.38		2.2157	570.92		5.0495	13912		5.8566	12454		3.7581	6439.5		hypothetical protein		Hypothetical proteins
DVU0102	2.812	143.68		2.7613	139.45		4.8922	119.75		5.0472	739.3		3.701	767.61		2.9309	697.4		cation ABC transporter, periplasmic binding protein		Transport and binding proteins	Cations
DVU1581				3.1204	1007.8		3.0188	752.02		5.0448	6568.5	2	4.9269	5790	2.5	3.8299	3959.8	3	hypothetical protein		Hypothetical proteins
DVU1745	2.4259	325.08		3.1852	464.8		4.0101	583.82		5.0427	747.51		6.5509	319.33		7.5826	182.38		DNA-binding protein		Unknown function	General
DVU3386	2.1528	117.65		2.7097	164.35		8.0966	75.175		5.0396	1116.4		4.1578	1316.7		3.8475	1644.4		permease, putative		Transport and binding proteins	Unknown substrate
DVU2280	1.1166	163.8		2.6044	168.63		7.2368	232.37		5.039	1697.4		10.013	1220		5.5372	2669.6		amino acid permease family protein		Transport and binding proteins	Amino acids, peptides and amines
DVU2723	3.0556	172.4		3.0439	170.22		2.3587	196.07		5.0367	263.51		4.0837	308.61		2.0386	356.13		tail protein, putative		Other categories	Prophage functions
DVU2316	4.815	153.78		4.6121	216.9		8.66	181.75		5.0261	1129.5		5.7787	1241.3		2.8154	847.78		DNA topoisomerase III (topB)	5.99.1.2	DNA metabolism	DNA replication, recombination, and repair
DVUA0139	1.9269	89.775		2.0929	98.025		6.4378	127.25		5.0256	249.33		3.8965	378.26		4.367	393.99		outer membrane autotransporter barrel domain protein		Cellular processes	Pathogenesis
DVU2250	4.7758	215.6	2	4.4899	275.9					5.0235	1359.5	69.5	6.287	1420.8	104.5	1.9181	1350	79.5	AMP-binding protein		Unknown function	General
DVU0192	0.50366	32.475		2.427	27		3.1142	98.925		5.0219	560.75		5.5227	661.33		2.0435	620.77		adenine specific DNA methyltransferase, putative		DNA metabolism	Restriction/modification
DVU0456	3.7282	554.63		3.7647	460.43		4.0526	575.05		5.0209	2979.3	3	8.631	2953.6	8.5	3.0095	1491.3	2	DHH family protein		Unknown function	General
DVU0283				6.8926	619.17	9	6.6549	616.67	5	5.0161	1440.8	79.5	7.079	980.96	93	2.7302	576.6	63	AhpF family protein/thioredoxin reductase		Energy metabolism	Electron transport
DVU0009	1.6674	147.8		2.5508	172.37		7.0049	156.1		5.0129	904.16		3.301	849.74		1.7536	729.6		DedA family protein		Unknown function	General
DVU1893	1.1391	212.55		6.1282	182.8		3.9724	139.82		5.0077	2642	4.5	7.7373	2961.9	5.5	8.8468	1555.7	4	ATP-dependent protease, putative		Protein fate	Degradation of proteins, peptides, and glycopeptides
DVU0662	2.3879	156.72		2.4994	198.8	2.66667	1.8869	100.28		5.0072	4152.9	1	7.161	2741.9	2	4.7134	1598.7	2	serine O-acetyltransferase (cysE)	2.3.1.30	Amino acid biosynthesis	Serine family
DVU0939	2.2965	177.22		2.4597	247.75		2.5322	257.17		5.001	2576.1		6.6633	2411.8		4.4062	3213.4		conserved hypothetical protein		Hypothetical proteins	Conserved
DVU1958	3.1492	196.22		3.7457	220.75		5.3362	205.42		4.9962	1865.9		8.7566	1725.5		1.8448	947.1		sensory box histidine kinase		Signal transduction	Two-component systems
DVU3106	0.24161	43.3		2.4275	62.95		5.4016	58.6		4.9927	1161.7		4.9847	903.61		3.8796	459.13		GGDEF domain protein		Unknown function	General
DVU3156	5.6806	329.43	12	4.0236	292.53	9.33333	5.3274	339.75	11.6667	4.9828	410.39	54.5	5.9184	401.3	79	3.2179	290.2	42.5	glucosamine--fructose-6-phosphate aminotransferase (isomerizing)s(glmS)	2.6.1.16	Central intermediary metabolism	Amino sugars
DVU2380	2.378	201.13		2.6968	333.57		4.916	307.65		4.9795	514.01		4.9865	445.38		2.0394	587.96		ABC transporter, ATP-binding protein		Transport and binding proteins	Unknown substrate
DVU2863	1.5058	117		2.7069	204.1		2.186	218.45		4.9789	1356.5		9.3555	2144.3		2.7523	556.65		hypothetical protein		Hypothetical proteins
DVU1361	3.5194	315.32		2.4219	275.6		2.9575	246.7		4.9781	2932.5		5.931	2136.6		3.0022	605.07		lipid A disaccharide synthase (lpxB)	2.4.1.182	Cell envelope	Biosynthesis and degradation of surface polysaccharides and lipopolysaccharides
DVU0289	2.5212	238.1		2.3927	277.1		1.7035	220.43		4.9777	4972.1	1.5	4.9599	2994	2	3.048	1312.4	1	molybdenum cofactor biosynthesis protein C (moaC)		Biosynthesis of cofactors, prosthetic groups, and carriers	Molybdopterin
DVU2494	3.0875	355.35		2.8676	570.55		3.8017	435.37		4.9731	8537.6	6	4.0272	3462.8	6	2.7138	2700.9	1.5	peptidase, M48 family		Protein fate	Degradation of proteins, peptides, and glycopeptides
DVU1046	2.3562	498.45		1.8601	193.43		1.6732	327		4.9668	10736		3.1058	5721.5		3.4626	3279.9		hypothetical protein		Hypothetical proteins
DVU3358	1.7612	120.55		2.3962	205.4		2.3375	323.57		4.9625	1055.9		6.372	730.64		2.4678	464		ParA family protein		Cellular processes	Cell division
DVU0121	2.105	178.25		2.0643	265.27		1.8377	238.35		4.9561	5953.4		4.5727	4786.6		3.0762	1766.7		conserved hypothetical protein		Hypothetical proteins	Conserved
DVU0189	1.5719	113.42		3.3365	152.75		3.5163	236.18		4.9506	969.43		7.5611	1246.1		2.8595	734.5		phage/plasmid primase, P4 family		Other categories	Prophage functions
DVU1597				3.0686	493.8	3	3.5535	664.32	6	4.9497	1591.5	26	6.097	812.33	23	3.437	644.77	9.5	sulfite reductase, assimilatory-type	1.8.-.-	Central intermediary metabolism	Sulfur metabolism
DVU2823	0.33577	113.72		3.2181	134.47		4.6223	174.18		4.9442	1433.4		9.8708	1586.1		5.4121	1784.6		TRAP dicarboxylate transporter family protein		Transport and binding proteins	Carbohydrates, organic alcohols, and acids
DVU1656	3.5496	905.18		2.9915	635.98		2.5849	471.35		4.94	7967		5.9691	7835.6		6.3253	6062.8		2-amino-4-hydroxy-6-hydroxymethyldihydropteridine pyrophosphokinases(folK)	2.7.6.3	Biosynthesis of cofactors, prosthetic groups, and carriers	Folic acid
DVUA0002	2.7928	417.53		2.3948	309.72		3.026	457.55		4.9299	2955.6		5.5251	2257.5		12.963	6384		ParA family protein		Cellular processes	Cell division
DVU2941	2.1851	337.98		2.0199	253.72		2.1372	274.55		4.9294	6262.2		4.3753	4899.3		14.868	15506		conserved hypothetical protein		Hypothetical proteins	Conserved
DVU2534				3.3952	392.18	5.66667				4.9276	4168.4	8	5.888	1887.4	6.5	3.007	2614	11	phenylalanyl-tRNA synthetase, alpha subunit (pheS)	6.1.1.20	Protein synthesis	tRNA aminoacylation
DVU1542	2.3143	188.15		2.3945	256		2.006	283.4		4.9265	401.48		5.4779	403.78		2.9673	504.51		hypothetical protein		Hypothetical proteins
DVU1903	1.6174	183		4.0433	166.57		3.5716	248.75		4.9242	2995.9	1	2.0889	1975.6	3.5	4.0784	1077.4	1	transcription-repair coupling factor (mfd)		DNA metabolism	DNA replication, recombination, and repair
DVUA0119	1.9687	179.87		3.2341	201.77		2.0683	182.52		4.922	2295.6		8.0991	2259.3		2.85	592.42		type III secretion system ATPase	3.6.3.14	Energy metabolism	ATP-proton motive force interconversion
DVU1123	2.6481	276.1		2.3802	269.3		1.7294	340.45		4.9163	204.16		4.8385	217.18		3.116	241.54		conserved domain protein		Hypothetical proteins	Domain
DVU3072	5.6605	249.12		3.3779	323.38		7.0219	203		4.9162	709.2		1.9606	625.41		2.1218	481.53		ABC transporter, permease protein, putative		Transport and binding proteins	Unknown substrate
DVU1684	3.8013	471.93		2.687	343.9	1.33333	4.1652	637.12		4.9162	4215.3	10.5	6.4578	2742.2	41.5	3.0081	1282.1	11.5	glycine cleavage system T protein (gcvT)	2.1.2.10	Energy metabolism	Amino acids and amines
DVU3238	2.7757	469.48		2.549	358.25		2.5148	323.85		4.9146	6018.3		5.5444	5728.2		3.6495	2861.1		response regulator		Regulatory functions	Protein interactions
DVU2158	1.4063	42.85		2.2728	38.75		1.0442	69.525		4.907	187.49		4.1174	203.35		3.7182	198.33		hypothetical protein		Hypothetical proteins
DVU2262	1.7499	138.92		1.8952	129.97		1.3463	175		4.8971	159.15		3.916	154.77		3.9823	219.24		hypothetical protein		Hypothetical proteins
DVU2175	2.4623	234.85		4.5865	269.68		132.58	411.02		4.8935	2194.2	2	3.7631	1992.9	2	10.48	1544.6	3.5	adenine specific DNA methyltransferase, putative		DNA metabolism	Restriction/modification
DVU1668	2.2926	260.95		2.8145	265.13					4.8909	3974.7	17.5	6.5042	2801.7	5	3.8769	3353.4	2	outer membrane lipoprotein carrier protein, putative		Protein fate	Protein and peptide secretion and trafficking
DVU2168	2.4528	220.65		3.2198	152.9		3.6587	220.8		4.8884	552.81		7.4139	535.31		3.2212	547.59		major head protein		Other categories	Prophage functions
DVU0698	3.6553	1138.8	2.66667				3.2491	634.63	2.66667	4.8771	9109.6	2	6.0537	9281.5	1.5	4.2114	4592.1	5	dTDP-4-dehydrorhamnose 3,5-epimerase (rfbC)	5.1.3.13	Cell envelope	Biosynthesis and degradation of surface polysaccharides and lipopolysaccharides
DVU1781	3.0889	408.05		2.5219	449.52		3.1137	645.1		4.8757	6408.7		7.2056	6887.2		3.1719	4205.7		conserved hypothetical protein		Hypothetical proteins	Conserved
DVU1561	2.253	149.4		2.3506	133.68		1.5794	171.78		4.8735	947.5		5.598	727.55		3.0796	925.41		molybdenum-binding protein, HTH domain		Unknown function	General
DVU3195	2.6524	233.85		2.6571	226.83		2.7712	181.4		4.8685	1345.6		6.8644	1223.1		3.5816	1386.1		lipoprotein, putative		Cell envelope	Other
DVU2526	1.0872	118.55		2.9274	119.22		3.5552	182.43		4.8668	1319.8		7.0529	1487		3.366	1315.4		periplasmic [NiFe] hydrogenase, large subunit, isozyme 2 (hynA-2)s	1.18.99.1	Energy metabolism	Electron transport
DVU3133	6.9143	1543.1		2.8363	346.8		7.7376	2249.1		4.8616	1410		6.4977	1172.5		4.3984	682.84		glycerol uptake facilitator protein		Transport and binding proteins	Carbohydrates, organic alcohols, and acids
DVU0380	1.2989	179.3		3.4582	231		4.853	160.57		4.8545	915.62		8.1222	770.02		3.4543	435.6		sulfatase, putative		Central intermediary metabolism	Other
DVU3196	3.1222	148.72		2.9653	95.925		2.9869	158.05		4.8542	1495.8		6.7146	1428.9		3.0717	919.29		twin-arginine translocation pathway signal sequence domain proteins		Unknown function	General
DVU1828	0.48884	42.4		2.7425	43.6		4.1467	61.1		4.8526	3450.5		10.729	3218.1		3.3072	2547.9		glucose inhibited division protein A (gidA)		Unknown function	General
DVU0351	3.3397	289.88		2.5349	237.32		3.2973	260.25		4.8525	3546.4		6.8286	2652.5		6.3306	2133.1		cytidine 5monophosphate N-acetylneuraminic acid synthetase,sputative/polysaccharide biosynthesis proteins		Cell envelope	Biosynthesis and degradation of surface polysaccharides and lipopolysaccharides
DVU0494	4.0925	311.6	7.33333	3.5716	279.8	3	4.0168	287.28	6.66667	4.842	833.59	2	6.7974	915.23	15.5	3.6753	461	4	aminotransferase, class V		Unknown function	Enzymes of unknown specificity
DVU0389	2.2675	359.23		3.0847	337.4		2.1594	300.72		4.8406	559.26		4.7764	449.84		4.4484	344.27		amino acid ABC tranporter, permease protein, His/Glu/Gln/Arg/opinesfamily		Transport and binding proteins	Amino acids, peptides and amines
DVU0321	2.6457	355.4		2.4504	226.1		2.0247	383.1		4.837	5956.5		8.3099	6253.6		3.3723	4683.3		transcriptional activator, putative, Baf family		Regulatory functions	DNA interactions
DVU3100	2.528	327.43		2.9705	278.27		2.3564	229.38		4.8326	3289.8		7.566	2764.2		3.1658	1145.2		biopolymer transport protein, ExbD/TolR family		Transport and binding proteins	Other
DVU1560	4.3645	440.88		3.5186	502.87	1	4.1495	562.38		4.8307	257.31		4.275	298.69		4.3108	342.76		molybdopterin biosynthesis protein, putative		Biosynthesis of cofactors, prosthetic groups, and carriers	Molybdopterin
DVU0172	4.0666	325.4		2.1077	358.32		2.6027	418.47		4.8304	2997.4	3	6.346	2508.5	2.5	2.8371	909.9	1.5	iron-sulfur cluster-binding protein		Energy metabolism	Electron transport
DVU3173	2.3218	372.5	1.33333	2.0708	411.62	3.33333	1.7345	275.58		4.8303	7738.2	2.5	4.8379	5879.4	7	4.4069	4503.1	5	hypothetical protein		Hypothetical proteins
DVU2288	2.6815	781.45		2.2434	412.85		1.3874	139.17		4.8108	8414.6	6	5.273	6677.6	10	5.2421	4713	4	hydrogenase, CooL subunit, putative		Energy metabolism	Electron transport
DVU0965	2.5685	566.27		2.0484	354.05		1.8232	302.77		4.8097	4298		4.4653	3177.6		3.0764	1725.5		hypothetical protein		Hypothetical proteins
DVU1884	1.852	132.42		2.5135	212.7		6.1644	112.98		4.805	1105.8	9.5	3.0441	874.26	5	2.6506	753.46	2.5	methyl-accepting chemotaxis protein		Cellular processes	Chemotaxis and motility
DVU0821	3.9773	376.7		2.1526	331.7		4.4694	992		4.802	6687.2		6.2324	3674		4.2025	4012.7		conserved hypothetical protein		Hypothetical proteins	Conserved
DVU2639	2.029	246.22		2.0913	310.4		1.7142	231.53		4.7943	4817.7		3.7781	3019.2		3.4549	2304.7		conserved hypothetical protein		Hypothetical proteins	Conserved
DVU3186	2.4798	203.78		2.0791	169.63		2.7893	288.72		4.7925	9244.1		7.1591	8393.6		6.9375	8497		hypothetical protein		Hypothetical proteins
DVU0170	12.678	586.57		2.8488	230.87		8.2139	862.93		4.7915	1774.1	11.5	5.2819	1494.4	6	3.3363	620.26	2.5	methyl-accepting chemotaxis protein		Cellular processes	Chemotaxis and motility
DVU2296	1.8677	118.95		2.3557	186.72		1.3881	96.725		4.7906	910.85		5.4061	798.4		2.6814	653.71		monofunctional biosynthetic peptidoglycan transglycosylase (mtgA)s	2.4.2.-	Cell envelope	Biosynthesis of murein sacculus and peptidoglycan
DVU0836	4.3524	352.77		2.643	341.38		3.0076	261.1		4.7887	2340.6		9.4232	2561.8		3.4943	2989.9		tRNA (guanine-N1)-methyltransferase (trmD)	2.1.1.31	Protein synthesis	tRNA and rRNA base modification
DVU1096	3.4665	319.23	4	3.0744	316.65	4.33333	2.6726	288.63	2.66667	4.7885	1109.4	6	5.7626	774.66	9.5	2.409	479.5	7	ornithine carbamoyltransferase (argF)	2.1.3.3	Amino acid biosynthesis	Glutamate family
DVU3107	15.098	1009.3	2.33333	2.9801	177.15	1.66667	13.042	1026.3	3	4.7858	1291.6		7.6437	1541.1		1.6195	451.08		cytochrome c family protein		Energy metabolism	Electron transport
DVU2463	2.2402	127.97		2.3115	112.87		1.6969	62.95		4.7805	2402.9		4.4828	1696.1		2.7746	1008.8		DNA repair protein RecN (recN)		DNA metabolism	DNA replication, recombination, and repair
DVU3200	2.6042	427.55		2.1459	341.07		2.213	303.68		4.7735	7676.5		4.8062	5862.4		3.3658	3188.6		recombination protein RecR (recR)		DNA metabolism	DNA replication, recombination, and repair
DVU0236	1.4009	71.575		2.1735	43.05		2.9317	98.9		4.772	722.26		5.963	879.35		2.2288	998.69		site-specific recombinase, phage integrase family		DNA metabolism	DNA replication, recombination, and repair
DVU1870	2.0571	131.52		2.2822	182.57		2.7092	148.38		4.7707	812.12		3.3484	839.66		2.9004	491.71		cyclase, putative		Unknown function	Enzymes of unknown specificity
DVUA0073	3.9036	368.45		4.9659	263.9		6.6573	262.88		4.7689	4251.1		5.5506	3672.4		3.0045	1891.3		asparagine synthase (glutamine-hydrolyzing), putative		Amino acid biosynthesis	Aspartate family
DVU1072	2.5236	217.02		2.4153	376.1		2.4725	325.42		4.7682	4062	2	4.3809	2477.4	3	2.6894	2873.2	2.5	conserved hypothetical protein		Hypothetical proteins	Conserved
DVU1967	1.9766	133.68		2.1687	220.78		2.2966	287.25		4.7662	385.25		4.51	461.81		2.4389	559.12		transcriptional regulator, rrf2 protein, putative		Regulatory functions	DNA interactions
DVU2683	1.5316	159.75		2.8383	133.95		4.5382	131.82		4.7634	7983.4	1	5.5132	2158.5	3	2.1038	1299.9	7	L-lactate permease family protein		Transport and binding proteins	Carbohydrates, organic alcohols, and acids
DVU0408	2.0467	279.85		3.6221	194.8		8.4272	268.77		4.7547	1499.2		6.4029	1174.6		2.485	1529.4		response regulator/sensory box/GGDEF domain/EAL domain proteins		Regulatory functions	Protein interactions
DVU2302	5.4824	431.35		3.4694	322.77		4.7526	396.85		4.7537	2050.6		10.168	1482		1.8983	872.25		glutathione-regulated potassium-efflux system protein KefB, putatives		Transport and binding proteins	Cations
DVU1447	3.2261	272.8		3.2787	241.37		3.5939	237.15		4.7524	2951.2		10.49	2006.4		2.404	1024.1		CgeB family protein		Unknown function	General
DVUA0099	5.3845	198.78		3.411	181.57		5.1679	183.85		4.7469	1830.5		7.5178	1425.5		2.1496	454.36		HAMP domain protein		Unknown function	General
DVU0531	1.9047	224.85		3.5277	236.47		5.0437	174.42		4.7457	415.67		6.5653	328.82		11.024	1157.9		hmc operon protein 6		Energy metabolism	Electron transport
DVU1874	1.7031	364.18		13.392	490.6	19	5.8487	316.18		4.7404	2073.8	37.5	6.2828	1923.8	37.5	7.0922	1229.2	29	ATP-dependent Clp protease, ATP-binding subunit ClpB (clpB)s		Protein fate	Degradation of proteins, peptides, and glycopeptides
DVU2097	1.7496	135.37		2.3942	154.07		2.576	191.38		4.729	310.61		4.7418	263.82		4.3501	284.88		transcriptional regulator, putative		Regulatory functions	DNA interactions
DVU2129	1.8012	138.35		3.5157	104.88		4.4834	152.68		4.7259	264.15		6.7514	405.65		3.2751	241.4		sensory box histidine kinase/response regulator		Regulatory functions	Protein interactions
DVU0286	2.8821	321.08		2.8231	290.65		3.4698	324.77	1.66667	4.7213	1814.9	5.5	6.8063	1032.6	4.5	3.4102	657.97	1.5	imidazoleglycerol phosphate synthase, cyclase subunit (hisF)s		Amino acid biosynthesis	Histidine family
DVU1214	7.3177	230.82		2.4724	188.75		6.9811	227.9		4.7195	3285.7		7.0446	2535.3		5.645	1226.7		dolichyl-phosphate-mannose-protein mannosyltransferase family proteins		Cell envelope	Biosynthesis and degradation of surface polysaccharides and lipopolysaccharides
DVU2539	1.7689	108.7		1.7904	125.05		1.5956	194.62		4.7195	192.12		3.3507	467.78		2.8881	372.81		hypothetical protein		Hypothetical proteins
DVU0258	2.4491	173.33		5.7818	353.08		9.8637	318.57		4.7186	2176.2		8.2542	1516		3.7122	898.78		sensory box histidine kinase/response regulator		Regulatory functions	Protein interactions
DVU0575	2.5237	429.3		2.2086	560.67		2.0149	342.9		4.7182	9785.6		3.4122	5682.7		3.1662	4800.3		hypothetical protein		Hypothetical proteins
DVU1585	3.7	229.58		2.2386	108.58	1	6.7316	245.92		4.7157	1362.1	5	4.7053	1342.3	2.5	3.3459	917.44	2	vitamin B12-dependent methionine synthase family proteins	2.1.1.13	Amino acid biosynthesis	Aspartate family
DVU1823	4.8738	704.3		4.0221	532.88	1.33333	3.5361	624.6	1	4.7127	1677.9	3.5	6.1632	1226.6	5	3.7185	1800	2	glutamate synthase, iron-sulfur cluster-binding subunit, putatives		Amino acid biosynthesis	Glutamate family
DVU0168	2.5886	329.92		3.0743	328.27		3.5375	395.25		4.7121	4051.9		6.9547	2484		2.378	1428.8		oligopeptide/dipeptide ABC transporter, permease proteins		Transport and binding proteins	Amino acids, peptides and amines
DVU0398	4.3977	674.03	1.66667	8.9045	546.15	2.66667	10.705	450.2		4.7119	4211.4	13.5	11.307	3129	36	6.9214	2434.7	9	HMGL-like domain protein		Unknown function	General
DVUA0132	3.2866	386.88	5				2.441	241.48	5	4.7115	2232.4	28.5	6.7482	2038.8	33.5	3.4247	872.66	24	CRISPR-associated protein, TM1801 family		Hypothetical proteins
DVU0054	3.6217	186.95		2.5423	141.93		5.9943	268.75		4.7106	4478.4		5.4268	3362.2		2.7493	2453.3		dihydrouridine synthase family protein		Protein synthesis	tRNA and rRNA base modification
DVU2797	5.0824	672.38		2.4269	488.53		2.2478	462.25		4.7101	2148.1		6.0702	1893.6		2.6527	810.21		iron-sulfur cluster-binding protein		Energy metabolism	Electron transport
DVU0390	2.9814	172.78		2.4765	173.22		3.4125	111		4.7064	3440	6	6.2707	2933.9	11	3.6581	2164.9	5.5	glycolate oxidase, subunit GlcD, putative		Energy metabolism	Other
DVU2884				3.1192	78.4	1.66667				4.706	2591.3	9.5	8.4533	2202.1	9	3.4927	1652.2	12.5	peptidase, M18 family		Protein fate	Degradation of proteins, peptides, and glycopeptides
DVU1403	1.827	104.53		2.1045	148.47		2.5557	246.08		4.7053	1220.6		5.7277	1102.4		3.6643	775.15		cob(I)alamin adenosyltransferase (cobO)	2.5.1.17	Biosynthesis of cofactors, prosthetic groups, and carriers	Heme, porphyrin, and cobalamin
DVU0238	3.1654	663.37		2.64	797.35		3.4735	962.63		4.7044	6919		6.467	7861.3		3.8739	3450.5		hypothetical protein		Hypothetical proteins
DVU1530	4.5254	289.83	4.33333				7.127	266.23	4.33333	4.6946	2823.2	15	10.156	1921.3	34.5	3.0602	763.61	20.5	metallo-beta-lactamase family protein		Unknown function	Enzymes of unknown specificity
DVU1577	2.628	322.1		2.6748	280.2		1.9086	185.87		4.6941	2612.8		5.6474	2356.8		3.4621	1032.8		ATP-dependent protease hslV (hslV)	3.4.25.-	Protein fate	Degradation of proteins, peptides, and glycopeptides
DVU2043	0.18109	15.1		2.35	51.6		3.3089	30.85		4.6873	1164.8		4.8103	1071.5		1.8358	655.95		conserved hypothetical protein		Hypothetical proteins	Conserved
DVU2973	3.6707	1186		4.1615	1127.8		4.2626	1425		4.6871	3740.4	3	6.2231	4211.2	12.5	4.4494	2513.2	7	integration host factor, beta subunit		DNA metabolism	DNA replication, recombination, and repair
DVUA0009	3.7574	232.43		2.7975	263.9		4.4885	351.9		4.6858	168.37		3.6975	347.54		3.7677	279.78		nitrogenase MoFe cofactor biosynthesis protein NifE domain proteins		Central intermediary metabolism	Nitrogen fixation
DVU2024	2.116	172.28		2.9058	194.75		3.5253	301.5		4.6838	1627		7.6896	1715.1		4.7049	920.39		conserved hypothetical protein		Hypothetical proteins	Conserved
DVUA0143	2.7058	259.95		2.5545	203.5		2.1255	208.35		4.6814	230.7		3.4997	256.77		2.1114	295.79		nif-specific regulatory protein (nifA-2)		Central intermediary metabolism	Nitrogen fixation
DVU1943	2.6421	1105.3		4.8027	1936.3		4.4753	2396.5		4.679	15488		8.5334	22277		12.911	25034		hypothetical protein		Hypothetical proteins
DVU2705	2.384	71.7		3.0703	54.1		3.1914	155.65		4.6722	398.12		5.6989	408.87		2.0156	458.66		phage uncharacterized protein		Other categories	Prophage functions
DVU0809	2.097	303.73	1	2.2378	331.92		1.7811	266.03		4.6653	6259		4.0319	4610.1		3.6596	4036.2		glutamyl-tRNA(Gln) amidotransferase, C subunit (gatC)s	6.3.5.-	Protein synthesis	tRNA aminoacylation
DVUA0011	1.8637	153.9		2.719	149.7		2.8805	50.8		4.6615	253.36		5.1462	360.53		2.1354	286.61		nitrogenase molybdenum-iron protein beta chain (nifK)	1.18.6.1	Central intermediary metabolism	Nitrogen fixation
DVUA0007	3.9019	277.67		2.6456	275.25		4.1732	241.3		4.6605	486.28		3.9637	538.37		3.5214	325.94		nitrogenase cofactor biosynthesis protein NifB (nifB)		Biosynthesis of cofactors, prosthetic groups, and carriers	Other
DVU3353	3.6042	228.78		2.4594	224.15		3.7577	200.92		4.6595	3848		7.8329	4103.6		3.5511	2257.9		phosphopantothenoylcysteinesdecarboxylase/phosphopantothenate--cysteine ligases(coaBC)		Biosynthesis of cofactors, prosthetic groups, and carriers	Pantothenate and coenzyme A
DVU2322	3.6263	301.68		2.7356	306.8		4.5398	371.33		4.6579	2596.1		7.5813	2332.1		3.4593	1363.5		UTP--glucose-1-phosphate uridylyltransferase, putative		Purines, pyrimidines, nucleosides, and nucleotides	Sugar-nucleotide biosynthesis and conversions
DVU0165	2.0685	212.9		2.5947	190.03		3.5289	179.9		4.656	3916.3	2	6.9113	2783.6	8.5	4.9229	2756.2	3.5	oligopeptide/dipeptide ABC transporter, ATP-binding proteins		Transport and binding proteins	Amino acids, peptides and amines
DVU0135	2.5389	168.1		2.2831	156.82		2.5616	206.97		4.6556	2494.4		7.8169	2672.5		4.09	1998.2		conserved hypothetical protein		Hypothetical proteins	Conserved
DVU1644	2.8602	190.68		2.4826	186.38		11.926	387.9		4.6523	2672.8		10.875	2386.5		3.8198	5216.8		permease, putative		Transport and binding proteins	Unknown substrate
DVU2445	5.86	8151.1		8.469	3574.3		5.3111	3439.7		4.6502	9147.6		5.5772	11758		4.1316	5626.9		hypothetical protein		Hypothetical proteins
DVU1063	4.1602	194.62		3.2764	162.08		4.1407	211.45		4.6455	364.25	1	4.9213	382.45	1.5	5.1823	281.44	1	transcriptional regulatory protein		Regulatory functions	DNA interactions
DVU1414	0.058112	26.2		2.3985	57.2		4.5803	72.925		4.6349	1138.3		3.3796	1395.7		2.9679	717.97		sensory box/GGDEF domain/EAL domain protein		Regulatory functions	Small molecule interactions
DVU2076	3.9502	615.43		3.18	463.17		3.1335	622.68		4.6331	3895.7	6.5	15.622	7062	8.5	3.67	2081.3	2	chemotaxis protein methyltransferase (cheR-2)	2.1.1.80	Cellular processes	Chemotaxis and motility
DVU1608	5.7546	157.65		2.781	130.27		4.8446	129.78		4.6288	1088.9	1	3.3181	1139.5	1	2.7589	734.82	2	DNA ligase, NAD-dependent (ligA)	6.5.1.2	DNA metabolism	DNA replication, recombination, and repair
DVU0997	2.5887	187.15		2.2448	177.1		1.5296	167.13		4.6282	4069.3	5.5	7.9447	5035.4	5	4.3966	2606.7	1.5	5,10-methylenetetrahydrofolate reductase (metF)	1.7.99.5	Amino acid biosynthesis	Aspartate family
DVU2688	3.4438	199.57		3.6432	167.45		2.8496	115.32		4.6274	726.06		7.2673	566.56		3.1759	570.96		bacteriophage transposase A protein		Other categories	Prophage functions
DVU2041	1.3037	74.85		2.3225	103.92		4.0379	150.33		4.6272	1523.5		6.243	1004.9		2.6631	659.43		conserved hypothetical protein		Hypothetical proteins	Conserved
DVU0586	1.7233	94.5		2.0007	65.475		1.5921	250.9		4.6238	8393.9		4.4247	6920.9		3.7716	3687.8		hypothetical protein		Hypothetical proteins
DVU2171	3.3032	193.53		2.8866	266.47		5.8519	180.32		4.6212	379.21		5.4352	553.99		3.3262	391.27		portal protein		Other categories	Prophage functions
DVU1771	1.8867	107.8		2.6169	122.87		4.1725	130.9		4.6205	2541.8	1	6.9359	2242.3	1	3.1669	791.87	1	[Fe] hydrogenase gamma (hydC)	1.18.99.1	Energy metabolism	Electron transport
DVU1605	1.74	146.55		2.7921	241.48		4.4225	207.1		4.6181	951.34		5.4957	986.1		2.9777	715.36		excinuclease ABC, B subunit (uvrB)		DNA metabolism	DNA replication, recombination, and repair
DVU0488	2.9599	123.97	8.66667							4.6161	1636.2	18.5	7.5738	969.22	14.5	3.5727	835.47	8.5	phosphoribosylamine--glycine ligase (purD)	6.3.4.13	Purines, pyrimidines, nucleosides, and nucleotides	Purine ribonucleotide biosynthesis
DVU1243	2.9193	548.15		3.1903	524.18		3.3254	663.2		4.6154	3506.6		5.6335	2334.7		2.8901	1328.8		conserved hypothetical protein		Hypothetical proteins	Conserved
DVU0726	3.3795	294.23					3.9626	313	1.33333	4.6089	5370.8	2	8.5795	4566.6	2.5	3.8095	3002.4	3.5	queuine tRNA-ribosyltransferase (tgt)	2.4.2.29	Protein synthesis	tRNA and rRNA base modification
DVU1553	3.3714	279.02		2.3417	124.1		5.8636	307.03		4.6034	698.24		5.8715	577.11		2.4016	466.35		AMP-binding protein		Unknown function	General
DVU2475	1.8768	139.38		2.4213	136.43		1.7362	84.8		4.597	3717.7	1	6.6727	2204.4	15.5	2.7075	1091.7	3	oxidoreductase, NAD-binding, putative		Unknown function	Enzymes of unknown specificity
DVU2349	7.9905	566.27	18.3333	4.9702	433.78	15	10.258	648.35	18	4.596	4197.7	8.5	8.8986	3534.3	16	5.3577	880.82	14	carbohydrate phosphorylase family protein		Energy metabolism	Biosynthesis and degradation of polysaccharides
DVU2110	2.2052	175.85		2.8126	130.5		7.3691	329.82		4.5883	1260.5		5.5041	1110.5		3.1701	557.78		L-lactate permease		Transport and binding proteins	Carbohydrates, organic alcohols, and acids
DVU0200	3.8937	229.52		3.4621	254.23		2.5717	236.25		4.5646	2581.1		10.558	3378.1		2.8168	953.19		major head protein		Other categories	Prophage functions
DVU1653	0.91091	135.9		5.2605	220.98		4.5729	154.05		4.5633	544.88		4.9702	636.61		1.8127	794.33		polyA polymerase family protein		Transcription	RNA processing
DVU2894	3.6902	532.88		4.1192	411.2		4.4517	459.78		4.5626	3492.1		7.0214	2950.7		2.541	1378.5		sigma-54 dependent transcriptional regulator		Regulatory functions	DNA interactions
DVU3055	6.18	607.28		7.7571	456.5		5.1226	305.4		4.5599	1873.1	3	7.6498	1621.3	3	4.6244	988.78	2.5	ribonuclease, Rne/Rng family	3.1.4.-	Transcription	Degradation of RNA
DVU2828	2.2853	139.57		2.5216	234.12		4.1567	245.08		4.5591	461.46		5.8995	520.97		2.224	389.96		site-specific recombinase, phage integrase family		DNA metabolism	DNA replication, recombination, and repair
DVU1969	1.6096	88.975		2.6384	211.8		2.9109	188.13		4.5586	393.43		5.7262	401.89		3.055	691.56		hypothetical protein		Hypothetical proteins
DVUA0148	6.9561	201.7		3.8132	188.25		6.8052	136.17		4.5585	728.48		2.7422	668.51		1.7855	273.22		major facilitator superfamily protein		Transport and binding proteins	Unknown substrate
DVU2793	4.426	660.45		2.4633	344.73		2.7126	375.9		4.554	5090.7		4.3301	2860.5		2.5639	936.63		electron transport complex protein RnfD, putative		Energy metabolism	Electron transport
DVU0748	2.8827	170.75		3.137	248.05		3.7702	152.87		4.5444	2677.3		6.58	2072.6		3.2869	1243.7		acetyl-CoA synthetase (acs)	6.2.1.1	Energy metabolism	Other
DVU1610	2.595	177.33		2.3122	121.25		1.4708	58.4		4.5442	1158.8		4.9434	1355.5		2.2379	729.73		glutamine-dependent NAD+ synthetase (nadE)	6.3.5.1	Biosynthesis of cofactors, prosthetic groups, and carriers	Pyridine nucleotides
DVU3287	4.091	204.2		2.1403	178.75		4.773	172.88		4.5409	1672.9		4.2562	1491.7		2.418	812.4		glycosyl transferase, group 2 family protein		Cell envelope	Biosynthesis and degradation of surface polysaccharides and lipopolysaccharides
DVU3142	3.4938	219.45		3.4699	150.93		4.536	96.65		4.5396	922.17		4.9956	902.64		3.2939	585.35		sigma-54 dependent transcriptional regulator		Regulatory functions	DNA interactions
DVU2156	0.98836	17.4		2.6878	15.8		0.75238	19.1		4.5373	196.83		3.4113	415.2		2.2964	419.02		hypothetical protein		Hypothetical proteins
DVU1850	3.3173	1192.8		4.4761	920.23		4.5408	1238.2	2.33333	4.5357	7025.7	1.5	8.6303	9402.3	6.5	9.9783	15839	1	CBS domain protein		Unknown function	General
DVU1232	2.0494	181.68		2.3106	262		1.6937	188.35		4.5328	3039.5		5.1611	1452.3		3.1508	1055.1		nitrogen regulatory protein P-II (glnB-1)		Central intermediary metabolism	Nitrogen metabolism
DVU2160	2.2598	247.52		2.4104	259.43		1.9771	223.93		4.5292	242.31		4.6938	305.56		2.7744	381.85		hypothetical protein		Hypothetical proteins
DVU1033	2.1681	217.48		1.9799	143.68		2.8831	347.15		4.5291	6173.9	1	4.0905	5583	1	3.6994	4390.6	1	competence/damage-inducible protein CinA protein, truncations		Disrupted reading frame
DVU3014	3.1039	201.05		2.4425	165.92		3.1058	139.7		4.5268	1067.6		5.0748	925.15		2.2899	500.97		asparagine synthetase, glutamine-hydrolyzing	6.3.5.4	Amino acid biosynthesis	Aspartate family
DVU3136	2.9002	365.82	1.66667							4.5208	1397.1		6.586	1724.1		3.1061	1188.2		nitroreductase family protein		Unknown function	Enzymes of unknown specificity
DVU0360	1.7895	119.8		2.0748	78.05		2.9271	144.97		4.5208	481.27		3.3786	466.4		2.8031	516.97		acetolactate synthase, large subunit, biosynthetic type (ilvB-1)s	4.1.3.18	Amino acid biosynthesis	Pyruvate family
DVU2690	1.772	94		2.1757	97.125		1.1234	88.15		4.5128	223.35		4.3151	235.59		3.0469	262.25		hypothetical protein		Hypothetical proteins
DVU1806	0.68534	78.75		2.8958	74.525		6.3853	115.12		4.5091	2044.1		8.2288	1403.8		4.0398	1255.2		magnesium transporter (mgtE)		Transport and binding proteins	Cations
DVU0530	2.0254	153.72		2.2054	130.55		1.2185	122.43		4.5086	497.57		4.5151	464.33		1.8505	1494.9		response regulator, rrf1 protein		Signal transduction	Two-component systems
DVU0641	2.8065	270.95		2.5793	238.07		3.788	349.47		4.508	934		6.6362	1129.8		3.5079	681.34		conserved hypothetical protein		Hypothetical proteins	Conserved
DVU0702	2.6181	288.72		2.1996	372.82		2.0497	417.68	1	4.5071	5817.4		4.9276	3531.7		4.2704	4923		cytochrome c family protein		Energy metabolism	Electron transport
DVU0194	2.0397	184.43		3.1781	189.38		3.3936	203.02		4.5056	1270.1		8.8152	1346.7		3.0635	657.44		terminase, large subunit, putative		Other categories	Prophage functions
DVU2335	4.8162	283.42		4.445	266.55		2.6191	232.1		4.5008	3248.9		9.0172	2756.4		2.6854	1711.3		conserved domain protein		Hypothetical proteins	Domain
DVU2204	4.0573	496.35	20.3333				11.066	568.15	54.6667	4.4975	557.9		6.7944	393.56		3.6409	349.87		tryptophanase (tnaA)	4.1.99.1	Energy metabolism	Amino acids and amines
DVU1609	3.4317	676.85		2.8793	410.63		2.5743	388.28		4.4962	5253	5.5	6.0582	3813.9	6.5	3.0963	1693	1	dihydrodipicolinate reductase (dapB)	1.3.1.26	Amino acid biosynthesis	Aspartate family
DVU1160	1.7256	104.62		2.3253	161.02		5.8784	220.55		4.495	1111.7		6.1459	1051.6		4.0277	1334.4		urea transporter, putative		Transport and binding proteins	Amino acids, peptides and amines
DVU1525	0.87262	55.125		2.6556	100.85		2.1916	86.825		4.4926	1091.1		6.5123	700.34		2.3563	743.78		conserved domain protein		Hypothetical proteins	Domain
DVU2557	2.8177	282.75		2.2765	260.38		2.1312	217.05		4.491	5714.3		4.9335	4077.1		2.9915	1827.2		birA bifunctional protein (birA)	6.3.4.15	Biosynthesis of cofactors, prosthetic groups, and carriers	Biotin
DVU1710	2.2086	116.52		1.9452	169.93		1.8327	236		4.4884	284.34		5.2161	218.02		3.1071	293.23		conserved hypothetical protein		Hypothetical proteins	Conserved
DVU0866	2.4963	202.58		2.2316	188.88		1.9932	180.2		4.4874	4964.7		5.3428	3147.5		4.1405	3598.4		1-deoxy-D-xylulose 5-phosphate reductoisomerase (dxr)	1.1.1.267	Biosynthesis of cofactors, prosthetic groups, and carriers	Other
DVU1952	3.9622	360.45		2.314	244.55		2.6172	191.35		4.4866	3876.7	23	5.9039	2880.5	15	4.1181	5067.3	35.5	hypothetical protein		Hypothetical proteins
DVU1281	4.5573	327.63		2.6145	270.05		3.1313	182.45		4.4864	1718.1	2.5	6.3351	1485.4	1	2.0311	825.78	1.5	conserved hypothetical protein		Hypothetical proteins	Conserved
DVU2735	4.0234	461.32		3.3132	339.57		4.8089	348.58		4.4823	2732	3	6.3024	2169	9.5	3.4024	920.6	3	phenylacetate-coenzyme A ligase (paaK-3)	6.2.1.30	Energy metabolism	Other
DVU1210	4.9772	1734.1		3.2594	885.2		4.3335	1625.6		4.4814	585.79	6.5	5.7745	869.16	4	3.5067	1434.2	5.5	conserved hypothetical protein		Hypothetical proteins	Conserved
DVU0999	1.7703	107.75		2.5306	114.18		3.4355	82.625		4.4759	1086.3		5.4447	1319.7		1.1763	1107.1		thio:disulfide interchange protein, putative		Protein fate	Protein folding and stabilization
DVU3249	2.8518	376.67		2.5282	275.1		3.4369	819.2		4.4752	301.76		4.6178	235.44		2.4045	197.92		lipoprotein, putative		Cell envelope	Other
DVU1127	2.0396	130.48		1.9969	120.87		1.4237	101.3		4.4626	337.58		4.7197	319.45		2.7219	305.14		hypothetical protein		Hypothetical proteins
DVU2811	3.2212	335.33		2.5227	181.45		3.13	435.95		4.46	807.95		6.0704	599.48		3.0382	458.02		formate dehydrogenase, beta subunit, putative		Energy metabolism	Anaerobic
DVU1648	2.5978	400.85		3.1441	524.62		2.0973	268.1		4.4546	3822.1	17	5.8387	2915.1	3	2.6545	1330.7	2	lipoprotein, putative		Cell envelope	Other
DVU0124	1.2598	34.05		2.0827	45.225		1.5615	75.675		4.4539	6611.6		4.9294	4203.6		4.7767	4504.4		hypothetical protein		Hypothetical proteins
DVU0747	2.036	82.275		2.2427	102.75		1.5053	76.75		4.4491	552.81		3.8887	586.38		2.6874	839.8		ABC transporter, ATP-binding protein		Transport and binding proteins	Unknown substrate
DVU1724	1.6541	79.075		3.1008	132.07		1.9326	121.97		4.4487	233.88		3.3914	301.55		3.044	234.85		phage uncharacterized protein, putative		Other categories	Prophage functions
DVU1625	2.7836	349.73		2.5966	198.9		2.0207	247.78		4.448	4427.9		6.8262	3599.9		3.686	2567.2		phosphatase, YrbI family		Unknown function	Enzymes of unknown specificity
DVU3149	1.501	100.9		3.0529	36.3		3.1683	123.35		4.4477	5371.5	1	6.4197	5257.4	3	5.61	7862.4	1	signal peptide peptidase SppA, 36K type (sppA)	3.4.-.-	Protein fate	Degradation of proteins, peptides, and glycopeptides
DVU1477	1.3771	71.9		2.1887	163.45		12.249	204.22		4.4469	685.92		5.2225	741.47		3.0359	880.86		hypothetical protein		Hypothetical proteins
DVU3303	2.5227	149.65		2.5059	177		2.3271	164.22		4.4429	447.8		3.3072	344.55		2.5021	268.68		ATP-dependent protease La, truncation		Disrupted reading frame
DVU1677	2.9384	162.18	3.33333	2.5448	215.1		3.5348	269.85	2.33333	4.4376	4237.4	11.5	5.537	3379.4	5	3.789	3277.1	7.5	triosephosphate isomerase (tpiA)	5.3.1.1	Energy metabolism	Glycolysis/gluconeogenesis
DVU1756	2.0416	224.98		2.1462	255.8		1.5133	229.32		4.4375	4834.3		5.0793	4616.3		3.5465	3397.4		hypothetical protein		Hypothetical proteins
DVU1136	2.1826	214.15		2.2621	125.8		1.8723	227		4.4336	870.29		5.7362	750		2.9468	945.42		host-nuclease inhibitor protein Gam, putative		DNA metabolism	Other
DVU1144	4.4965	358		2.3897	333.77		7.8137	518.97		4.4323	5692.5	5.5	6.7003	3554	2	4.1836	3591.4	2	transcriptional regulator, Cro/CI family		Other categories	Prophage functions
DVU1672	1.3882	63.875		2.3668	73.15		1.2385	70.75		4.4294	3176	1	5.6292	2545.3	1.5	3.0248	1187	1	conserved hypothetical protein		Hypothetical proteins	Conserved
DVU1431	4.4788	245.6		4.5208	203.97		18.661	324.95		4.4285	1137.9		5.141	1055.4		3.4532	865.25		hpt domain protein/STAS domain protein		Unknown function	General
DVU1493	2.3044	301.52		2.1115	253.1		2.4283	286.88		4.4252	365.6		5.4965	350.43		3.0098	576.97		hypothetical protein		Hypothetical proteins
DVU0323	2.813	222.75	5.66667	2.2472	224	3.66667	2.099	230.27	3	4.4219	4131.6	7.5	5.2581	2001.7	21.5	3.6803	1589.7	2	methylenetetrahydrofolate dehydrogenase/methenyltetrahydrofolatescyclohydrolase (folD)		Biosynthesis of cofactors, prosthetic groups, and carriers	Folic acid
DVU0436	2.2878	224.25		2.484	202.75		2.4236	197.63		4.4177	673.92		5.3397	918.35		2.9741	559.22		transcriptional regulator, TetR family		Regulatory functions	DNA interactions
DVU2730	2.5418	157.23		2.2933	190.48		2.5511	142.53		4.4167	637.21		4.549	633.35		2.2543	476.67		tail fiber protein, putative		Other categories	Prophage functions
DVU1934	2.5172	396.02		2.7021	281.35		4.64	257.02		4.4146	5827.5		5.1255	4169.3		3.4343	2733		phosphonate ABC transporter, permease protein		Transport and binding proteins	Other
DVU2217	1.7365	83.225		2.4699	102.75		1.4007	41.3		4.412	712.14		4.5741	622.87		4.0391	438.35		acetyltransferase, GNAT family		Unknown function	Enzymes of unknown specificity
DVU0181	2.7025	217.38		2.2812	180.63		2.6848	208.5		4.4093	637.97		3.2357	630.24		2.6881	448.28		molybdenum ABC transporter, permease protein (modB)		Transport and binding proteins	Anions
DVU3381	3.2365	188.7		3.5309	173.45		4.0757	176.47		4.4059	1507.6		8.2512	2081.6		3.3843	1377.3		transcriptional regulatory protein zraR		Signal transduction	Two-component systems
DVU0355	2.9703	217.87		3.3319	236.13		6.7789	413.93		4.4058	765.1		6.1354	872.82		2.878	511.16		sensory box/GGDEF domain protein		Regulatory functions	Small molecule interactions
DVU2976	3.1761	377.82		2.9645	255.4		2.8592	322.73		4.4055	2482.3	2	7.0375	2347.7	3	3.3311	1390.7	1	conserved hypothetical protein		Hypothetical proteins	Conserved
DVU2661	4.4799	354.38		2.6345	350.25		3.0867	403.67		4.4029	614.97		3.7503	576.59		1.5396	373.71		twin-arginine translocation pathway signal sequence domain proteins		Unknown function	General
DVU2118	3.0332	340.58		2.6996	252.95		3.5994	370.23		4.4023	826.25		5.73	814.15		2.5	608.19		conserved hypothetical protein		Hypothetical proteins	Conserved
DVU3229	2.6097	290.65		2.4186	257.28		1.8812	194.4		4.4009	720.5		5.5304	675.65		2.4024	416.97		RNA polymerase sigma factor for flagellar operon FliA (fliA)s		Cell envelope	Surface structures
DVU1626	3.0652	290.78		2.2002	191.9		2.0884	116.4		4.3996	3117.6		7.0353	3074.6		2.867	1912.2		hypothetical protein		Hypothetical proteins
DVU2816	1.337	191.28		5.0351	208.13		2.6197	212.55		4.3996	1183.3		4.8234	539.18		8.6457	1502.8		multidrug resistance protein		Cellular processes	Toxin production and resistance
DVU0931	2.6471	207.95		2.3431	173.7		4.6445	268.3		4.3987	3422.4		5.4057	1730.4		6.8677	4401.4		phosphomethylpyrimidine kinase (thiD)	2.7.4.7	Biosynthesis of cofactors, prosthetic groups, and carriers	Thiamine
DVU0806	2.1811	220.68		1.9696	186.93		1.9149	240		4.3962	6007.1		3.7663	3975		3.2656	2074.8		chemotaxis protein CheY, putative		Cellular processes	Chemotaxis and motility
DVU1122	1.5026	66.35		3.0073	145.53		1.8502	127.43		4.3958	284.69		4.7136	320.82		3.2571	343.79		portal protein, putative		Other categories	Prophage functions
DVU1262	2.9981	212.75		2.5709	240.82		2.819	251.47		4.3948	1449.9		4.3646	1298		1.9534	665.42		twitching motility protein PilT		Cellular processes	Chemotaxis and motility
DVU3258	3.8213	347.15		3.1305	424.75		3.1901	176.25	1	4.39	1333.9	2	5.6481	1309.2	3	4.3689	720.84	1.5	UDP-N-acetylglucosamine 1-carboxyvinyltransferase (murA)s	2.5.1.7	Cell envelope	Biosynthesis of murein sacculus and peptidoglycan
DVU2869	4.3821	317.15		3.4741	251.28		3.1397	286.55		4.3899	2761.6		10.229	3287.4		3.0026	899.07		major head protein		Other categories	Prophage functions
DVU2854	2.4723	81.6		2.87	140.65		3.3028	180.7		4.388	765.81		5.5387	756.4		2.6634	435.38		tail protein, putative		Other categories	Prophage functions
DVUA0147	2.3111	99.3		2.753	55.95		2.8705	153.4		4.3829	2448.3		6.6799	2547.2		3.5563	1495.8		conserved hypothetical protein		Hypothetical proteins	Conserved
DVU3083	1.5894	71.3		1.8762	129.42		1.4361	210.93		4.3822	8263.8		6.5117	11602		8.9395	11326		hypothetical protein		Hypothetical proteins
DVU1596	3.1827	350.85		2.3147	184.72		2.5405	297.23		4.3816	2146.9		5.9516	2025.7		2.4644	1195.7		protein-glutamate methylesterase CheB (cheB-1)	3.1.1.61	Cellular processes	Chemotaxis and motility
DVU1190	0.27486	85.4		2.9114	130.85		6.3982	116.95		4.3796	3589.7		7.8441	2451.7		4.1759	1024.9		sensory box/GGDEF domain/EAL domain protein		Regulatory functions	Small molecule interactions
DVU2448	5.7294	834.43		2.5364	353.33		2.7738	362.2		4.3794	5775.3	2	6.612	6827.7	6.5	6.9265	5227.2	3	pantoate--beta-alanine ligase (panC)	6.3.2.1	Biosynthesis of cofactors, prosthetic groups, and carriers	Pantothenate and coenzyme A
DVU1421	2.2558	256.27		2.2516	221.5		2.0339	328.53		4.378	3438.9	6.5	5.7459	3668.3	22	3.5172	1878.9	4.5	hypothetical protein		Hypothetical proteins
DVU0085	2.281	153.9		3.1705	216.88		5.7789	216		4.3728	2033.1	20	6.4834	1735.3	14.5	7.8418	3041	10.5	tryptophan synthase, beta subunit (trpB-1)	4.2.1.20	Amino acid biosynthesis	Aromatic amino acid family
DVU1887	1.5251	200.33		3.0727	160.63					4.3684	5168.2	4.5	6.8229	3054.7	12.5	1.8629	1449	6	hypothetical protein		Hypothetical proteins
DVU1986				2.2802	532.98	3.33333	2.7839	1094.5	1.66667	4.3681	7934.8	2.5	3.4981	4250	1.5	2.8702	1877.1	2	conserved hypothetical protein		Hypothetical proteins	Conserved
DVU3363	5.4908	180.28		2.6928	240.35		6.1512	210.85		4.3659	2149.1		7.0204	2153.4		5.1569	1132.4		sun protein (sun)	2.1.1.-	Protein synthesis	tRNA and rRNA base modification
DVU3291	1.2728	164.82		2.2913	134.85		3.4719	159.82		4.3636	498.18		5.989	448.31		5.7368	1006.2		glutamate synthase, iron-sulfur cluster-binding subunit, putatives		Amino acid biosynthesis	Glutamate family
DVU0171	2.8681	194.2		2.4436	227.85		3.3862	225.15		4.3611	1028.7		5.3206	1039.9		2.4203	633.6		hemolysin-related protein		Unknown function	General
DVU2037	2.3759	184.52		2.9883	245.15		5.7796	337.17		4.3611	2643.1		5.4186	1854		2.4075	656.71		cobS protein, putative		Biosynthesis of cofactors, prosthetic groups, and carriers	Heme, porphyrin, and cobalamin
DVU1341	3.7538	534.15		2.8189	398.18		4.8589	290.13		4.3605	6976.8		6.1267	4991.5		3.5696	2589		cation ABC transporter, permease protein		Transport and binding proteins	Cations
DVU1454	3.2064	203.7		2.7244	236.6		3.4616	245.97		4.3541	1784.8		6.0278	1177.4		4.5698	1896		2-C-methyl-D-erythritol 4-phosphate cytidylyltransferase (ispD)s	2.7.7.60	Biosynthesis of cofactors, prosthetic groups, and carriers	Other
DVU0520	2.7783	191.08		2.6028	182.6		5.7014	266.65		4.3538	4574		9.3825	3834.3		2.997	1554.8		flagellar hook-associated protein FlgL, putative		Cellular processes	Chemotaxis and motility
DVU0871				2.9872	359.63	3.33333	2.9477	354.25	1.33333	4.3447	3327.6	9	6.3517	2259.8	6.5	5.3936	4528.8	5	uridylate kinase (pyrH)	2.7.4.-	Purines, pyrimidines, nucleosides, and nucleotides	Pyrimidine ribonucleotide biosynthesis
DVU0164	1.9299	199.25		2.3165	171.68		3.0679	140.65		4.3443	877.57		4.1182	839.47		2.4375	978.31		cation efflux family protein		Transport and binding proteins	Cations
DVU2075	4.1764	707.62		2.9587	393.55		3.1202	629.1		4.3384	1013.8		6.1171	1231.1		2.2618	439.91		ParA family protein		Cellular processes	Cell division
DVU2180	1.9372	242.63		1.9175	347.57		2.3752	510.88		4.3364	8769.6		4.8359	9290.4		4.388	4623.6		hypothetical protein		Hypothetical proteins
DVU3179	3.3583	339.63		2.7003	312.3		2.673	213.45		4.3334	3436	2	5.7858	2818	1	4.1981	2227.5	1	octaprenyl-diphosphate synthase (ispB)		Biosynthesis of cofactors, prosthetic groups, and carriers	Menaquinone and ubiquinone
DVU1091	2.4659	185.1		2.534	181.55		1.8961	123.25		4.3288	3287.4	1.5	5.5637	1646.5	2	2.4508	1210.3	1	conserved hypothetical protein		Hypothetical proteins	Conserved
DVU1018	2.3285	197.25		3.3805	176.68		2.0764	208.63		4.3284	2960.1	1.5	7.1074	2592.9	3.5	2.6533	997.81	1	type I secretion membrane fusion protein, HlyD family		Protein fate	Protein and peptide secretion and trafficking
DVU2992	2.5955	162.12		2.159	153.38		3.0298	165.98		4.3273	1829	2	4.5439	1683.1	2.5	2.7257	1246.8	1	glycosyl transferase, group 2 family protein		Cell envelope	Biosynthesis and degradation of surface polysaccharides and lipopolysaccharides
DVU1556	3.0087	338.53		1.9769	185.7		3.5778	249.32		4.325	446.28		5.176	377.7		3.5374	297.27		conserved domain protein		Hypothetical proteins	Domain
DVU2931	0.27537	54.925		3.664	18.425		3.9309	107.32		4.3189	1977.4	1	8.2863	1575.8	1	4.6695	583.43	1	sensory box histidine kinase	2.7.3.-	Signal transduction	Two-component systems
DVU2901	3.3925	375.8		3.1055	334.7		1.9899	327.73		4.3173	2944		6.2223	2449.2		2.8086	1790		aspartate carbamoyltransferase (pyrB)	2.1.3.2	Purines, pyrimidines, nucleosides, and nucleotides	Pyrimidine ribonucleotide biosynthesis
DVU0640	4.8676	447		2.6961	396.58		2.8149	445.55		4.3156	2615.6		5.1501	1763.4		3.4277	1029.5		chemotaxis protein PomA (pomA)		Cellular processes	Chemotaxis and motility
DVU1448	3.4346	391.32		2.7707	499.13		2.6727	527.5		4.3102	2894.2	1	7.9282	3248.6	1	3.2687	1553.4	1	conserved hypothetical protein		Hypothetical proteins	Conserved
DVU0544	2.2066	171.3		2.5391	131.77		2.1343	240.45		4.3092	1118.3		5.6801	1086.1		3.1593	1040.4		hypothetical protein		Hypothetical proteins
DVU0270	3.5247	454.4		5.9062	393.35		3.8097	420.83		4.3084	4119		7.8914	3436.5		3.5929	2854.4		sensory box histidine kinase		Signal transduction	Two-component systems
DVU2137	0.83235	39.3		2.6942	45.475		4.2026	99.675		4.3056	339.9		3.641	389.78		4.4535	338.82		succinyl-CoA synthase, beta/alpha subunits (sucCD)	6.2.1.5	Energy metabolism	TCA cycle
DVU1514	3.4116	189.42		2.3015	161.35		3.6171	92.15		4.3051	530.98		5.3378	379.06		2.6398	482.46		hypothetical protein		Hypothetical proteins
DVU1186	3.6604	260.25	2.33333	3.2579	248.55		2.0775	138.28		4.3035	1596.5	8	8.1507	1465.6	9	4.5564	695.82	2	MazG family protein		Unknown function	General
DVU0990	2.4171	193.13		2.5369	38.775		1.7605	102.53		4.3034	3019.2		6.5513	2204.8		3.2367	1571.5		endonuclease III, putative		DNA metabolism	DNA replication, recombination, and repair
DVU0243	2.0432	153.72		2.2356	211.08		1.8919	206.7		4.3025	3300.6		6.205	2524.3		3.2782	1977.1		lipoprotein, putative		Cell envelope	Other
DVU0655	3.3691	204.95		2.9822	239.27		2.4426	149.47		4.2961	3187.6	2	7.1918	2607.5	1.5	3.2378	1569.7	1	PHP domain protein		Unknown function	General
DVUA0038	2.3142	201.53		2.3707	206.92		2.7944	170.77		4.2954	519.61		5.2153	385.88		2.5331	259.06		capsular polysaccharide transport protein		Cell envelope	Biosynthesis and degradation of surface polysaccharides and lipopolysaccharides
DVU2840	2.896	372.52		2.3751	259.6		7.2347	916.98		4.2951	6462.7		8.2929	7443.1		4.5768	5296		conserved hypothetical protein		Hypothetical proteins	Conserved
DVUA0040	2.1063	133.55		2.1607	129.4		2.5221	197.63		4.2936	215.66		5.2209	188.14		2.9558	221.3		polysaccharide biosynthesis protein, putative		Cell envelope	Biosynthesis and degradation of surface polysaccharides and lipopolysaccharides
DVU0804	3.9645	287.9		2.8248	164.32		6.5908	208.2		4.2916	864.44		4.9253	1175.3		3.5049	799.2		sigma-54 dependent transcriptional regulator/response regulators		Regulatory functions	DNA interactions
DVU0523	2.4103	319.53		2.4965	353.98		1.9993	300.75		4.2875	1886.5		6.1002	2320.7		5.7997	3906		negative regulator of flagellin synthesis FlgM (flgM)s		Cellular processes	Chemotaxis and motility
DVU1933	2.7371	445.45		2.8617	518.35		2.6205	373.95	1.33333	4.28	3859.2		5.3335	2960		2.944	1251.4		peptidase, PfpI family		Protein fate	Degradation of proteins, peptides, and glycopeptides
DVU2497	2.5476	291.57		3.9308	729.4		3.0425	575.12		4.2796	3038.8		5.9908	2862.3		2.343	1813.4		lipoprotein, putative		Cell envelope	Other
DVU0506	2.0714	103.58		2.5722	209.17		3.5325	195.3		4.2792	1237.4		6.6575	1045.5		6.1258	3640.9		DHH family protein		Unknown function	General
DVU1650	2.96	211.2		2.594	179.78		2.3929	202.07		4.2785	2264.3		6.1895	1644.4		3.0567	735.35		conserved hypothetical protein		Hypothetical proteins	Conserved
DVU0786	1.1807	143.03		2.6836	169.4		2.7687	109.18		4.2785	1677.5		6.1482	1786.4		3.6824	872.35		penicillin-binding protein		Cell envelope	Biosynthesis of murein sacculus and peptidoglycan
DVU2203	3.4345	786.4	6.33333	6.0495	1139.1	6				4.2732	2809.7		5.4423	1541.2		3.6012	887.63		endoribonuclease, L-PSP family		Transcription	Degradation of RNA
DVU0743	3.6576	218.82		2.6371	220.47		4.7759	255.82		4.2669	1788.6		5.74	1788.3		1.5954	679.14		sensory box histidine kinase		Signal transduction	Two-component systems
DVUA0115	2.6611	476.4		2.1289	188.45		2.2139	335.15		4.2651	4064.2	1	4.5392	3567.9	2	3.16	1156.4	2	type III secretion system protein, YscF family		Protein fate	Protein and peptide secretion and trafficking
DVU1871	3.0274	211.98		2.5205	216.5		3.8212	229.95		4.2644	995.72	2	5.2645	770.94	1	3.101	751.16	1	aspartate ammonia-lyase (aspA)	4.3.1.1	Energy metabolism	Amino acids and amines
DVU1696	1.8083	123		2.0509	118.45		1.4983	161.37		4.2614	356.44		4.0647	371.02		2.3978	711.75		hypothetical protein		Hypothetical proteins
DVU2206	2.0827	190.22		2.5646	283.13		2.2475	338.13		4.2606	4307.7		4.3709	2138.9		4.1584	4073		conserved hypothetical protein		Hypothetical proteins	Conserved
DVU0942	2.0247	209.2		2.3413	199.4		1.4211	128.78		4.2578	5667.1	2	5.9233	5410	4	5.1372	5803.2	2	transcriptional regulator, Fur family		Regulatory functions	DNA interactions
DVU1424	4.5351	364.13	3	3.6246	366.65	5.33333				4.2575	1762.7	2	6.5115	1311.6	10	3.1619	998	1	glycine cleavage system P protein, subunit 2 (gcvPB)	1.4.4.2	Energy metabolism	Amino acids and amines
DVU1270	2.7603	250		2.3322	220.62		3.877	274.98		4.2574	1831.9		4.7823	1601.4		3.4304	844.08		twitching motility protein		Cellular processes	Chemotaxis and motility
DVU3125	3.4433	837.42		3.461	691.45		4.6495	788.25		4.255	9191.4	4	4.0191	5535.7	4	3.7414	4993.3	9.5	lipoprotein, putative		Cell envelope	Other
DVU1822	3.9564	353.3		2.7961	277.67		3.2336	385.55		4.2505	1488.5		6.1361	952.27		3.6871	1270.9		glutamate synthase, amidotransferase subunit, putative		Amino acid biosynthesis	Glutamate family
DVUA0051	3.1193	118.2		2.2981	55.15		1.4824	147.07		4.2493	286.39		3.6104	351.73		3.0587	211.1		glycosyl transferase, group 1 family protein		Cell envelope	Biosynthesis and degradation of surface polysaccharides and lipopolysaccharides
DVU3257	10.74	170.1		2.2334	151.78		5.1084	147.95		4.2491	554.07		2.7658	1056.6		3.0304	689.62		DNA internalization-related competence protein ComEC/Rec2s		Cellular processes	DNA transformation
DVU1971	2.3965	195.25		2.0814	202.2		2.0432	299.47		4.245	2454.8		6.0995	2179.8		19.86	17263		conserved domain protein		Hypothetical proteins	Domain
DVU2184	0.63188	10.8		2.2931	40.175		1.51	116.75		4.2412	855.97		3.1277	1349.7		2.6311	1967.6		DNA-binding domain, excisionase family		Unknown function	General
DVU0199	2.1611	221.63		2.1371	197.9		1.4056	149		4.2405	4443.5		5.0773	5515.6		2.3008	1033.7		conserved hypothetical protein		Hypothetical proteins	Conserved
DVU2099	1.9495	106.93		2.0514	133.05		2.5982	248.65		4.2392	389.98		3.9145	436.37		2.5755	431.31		carbon monoxide dehydrogenase accessory protein CooC, putatives		Energy metabolism	Other
DVU2374	2.7375	316.02		2.8646	282.43		3.2036	272.6		4.2364	2953.2		5.9926	2227.6		3.1561	1076.5		lipoprotein releasing system, ATP-binding protein (lolD)s		Transport and binding proteins	Other
DVU0510	4.961	1022.8	2.33333	4.874	553.83	5.33333				4.235	2072.9	70.5	9.5737	3596.9	58	10.674	9736.4	48.5	N utilization substance protein A (nusA)		Transcription	Transcription factors
DVU2088	2.5647	191.85		2.1842	267.9		2.1004	237.6		4.2307	7560		4.5891	4314.4		2.5159	1396.5		membrane protein, putative		Cell envelope	Other
DVU0062	9.7289	368.43		2.6293	300		3.2877	246.22		4.2266	4108.9	5.5	6.7015	4547.1	7.5	7.9856	10487	5	RND efflux system, outer membrane protein, NodT family		Cellular processes	Detoxification
DVU2136	3.2348	211.83		2.3311	276.63		3.7834	222.45		4.2263	777.69		5.1176	841.39		2.5434	539.01		hypothetical protein		Hypothetical proteins
DVU1953	2.7663	221.18	4.66667	2.5155	246.25	2.33333	2.2754	188.77	4	4.2246	2772.4	8.5	5.8762	2029.9	10	3.8566	1600	8.5	gamma-glutamyl phosphate reductase (proA)	1.2.1.41	Amino acid biosynthesis	Glutamate family
DVU1527	1.1082	76.75		2.2698	141.5		3.9808	184		4.2222	498.39		4.8578	482.94		2.504	427.41		site-specific recombinase, phage integrase family		DNA metabolism	DNA replication, recombination, and repair
DVU0516	1.8332	106.52		2.5961	257.72		2.9478	178.53		4.2214	2042.2		6.0375	1916.7		3.0241	1065.2		flagellar P-ring protein FlgI (flgI)		Cellular processes	Chemotaxis and motility
DVU2521	2.4179	235.5		2.3574	275.83		1.5151	103.78		4.2189	3873.5		4.5958	2811.7		3.5636	3122.4		shikimate kinase (aroK-2)	2.7.1.71	Amino acid biosynthesis	Aromatic amino acid family
DVU2228	3.5599	353.35		2.8567	385.73		3.2516	399.47		4.2154	1253		4.9588	1005.5		3.5306	916.81		motB protein, putative		Cellular processes	Chemotaxis and motility
DVU2558	2.1318	111.08		1.9499	122.13		2.2293	267.4		4.2147	2937.8		5.0991	3179.5		3.1207	1761.5		biotin synthase (bioB)	2.8.1.6	Biosynthesis of cofactors, prosthetic groups, and carriers	Biotin
DVU3077	2.9225	239.55		2.6182	274.25		3.3016	285.95		4.211	2401.1		6.1118	2015.7		3.151	1408.4		AhpC/TSA family protein		Unknown function	General
DVU0438	1.0135	206.65		2.8965	113.38		3.5923	187.93		4.2105	1581.6		5.703	1357		2.4288	962.29		AcrB/AcrD/AcrF family protein		Cellular processes	Toxin production and resistance
DVU3191	1.1886	20.075		2.6073	24.775		0.87635	24.825		4.2103	5178.5	1	5.0089	4291.6	1.5	2.1496	3421.2	1	ribosomal large subunit pseudouridine synthase C (rluC)s	4.2.1.70	Protein synthesis	tRNA and rRNA base modification
DVU0529	1.4317	60.525		2.2306	122.65		1.9644	155.6		4.2093	470		5.4385	360.26		2.5557	1754		transcriptional regulator, rrf2 protein, putative		Regulatory functions	DNA interactions
DVU0276										4.2086	6183	2	4.9384	5450.4	4.5	3.2306	3103.2	1	conserved hypothetical protein		Hypothetical proteins	Conserved
DVU0177	9.0971	1411.4	9.33333				3.6435	517.9	11.3333	4.2052	1796.1		6.1555	2013.7		2.6885	1662.8		molybdenum ABC transporter, periplasmic molybdenum-binding proteins(modA)		Transport and binding proteins	Anions
DVU1809	2.837	234.4		2.1708	195.92	1.66667	2.8536	108.47		4.2052	7515.1		4.4423	4439.8		2.8333	1402.7		L-aspartate oxidase (nadB)	1.4.3.16	Biosynthesis of cofactors, prosthetic groups, and carriers	Pyridine nucleotides
DVU0073							3.1555	398.23	5.33333	4.2047	2586.9	1	8.0932	2275.9	2	3.0331	986.41	2	CDP-glucose-4,6-dehydratase, putative		Cell envelope	Biosynthesis and degradation of surface polysaccharides and lipopolysaccharides
DVU0444	10.461	230.23		3.4638	347.73		7.128	338.25		4.2005	721.58		3.2293	486.9		0.89595	612.25		CBS domain protein		Unknown function	General
DVU2354	2.9864	298.85		2.2504	291.72		2.1313	212.73		4.1964	3999.2	15	5.1755	4208.9	14.5	3.153	3263.2	15	glycosyl transferase, group 2 family protein		Cell envelope	Biosynthesis and degradation of surface polysaccharides and lipopolysaccharides
DVU2178	4.3623	434.93		2.8118	537.55		3.7594	1021.9		4.1925	2278.9		6.7281	1425.8		2.9535	936.07		ISDvu2, transposase OrfB		Other categories	Transposon functions
DVU2223				2.0541	258.73		2.1886	256.27		4.1925	6482.6		4.3959	6095.3		4.2912	5234.4		hypothetical protein		Hypothetical proteins
DVU0094	5.3884	113.55		2.4561	46.05		3.0487	39.975		4.1901	623.41	10	2.3161	476.09	5.5	2.093	1048.4	3	methyl-accepting chemotaxis protein		Cellular processes	Chemotaxis and motility
DVU3095	6.0338	6114.2		10.388	3043		10.001	5726.5		4.1888	5050.7		12.304	17923		14.861	23528		transcriptional regulator, Fur family		Regulatory functions	DNA interactions
DVU2481	2.3871	227.43		2.3697	304.92		2.3517	399.82		4.1865	4436.5	2.5	6.6693	3972	10.5	3.1945	1856.5	1.5	formate dehydrogenase, beta subunit, putative		Energy metabolism	Anaerobic
DVU3090	2.9692	215.95		2.2541	157.03		2.8151	141.4		4.1864	2890.6	1	6.5732	2028.8	1	5.9499	3797.6	1.5	outer membrane protein, OMPP1/FadL/TodX family		Cell envelope	Other
DVU1897				3.0899	29.7	7.66667	5.1769	123.63	8.33333	4.1844	976.55	5	4.8784	925.82	23	3.1727	963.17	3	glycyl-tRNA synthetase, beta subunit (glyS)	6.1.1.14	Protein synthesis	tRNA aminoacylation
DVU1070	1.479	134.47		3.2085	105.73		5.0138	214.67		4.1835	1626.4		6.5067	1807.6		3.7952	1330.5		branched chain amino acid ABC transporter, ATP-binding proteins		Transport and binding proteins	Amino acids, peptides and amines
DVU3292	1.9308	88.325		2.2495	111.15		5.3368	130.88		4.1817	955.64		7.0273	821.49		5.3779	2236.9		pyridine nucleotide-disulfide oxidoreductase		Unknown function	Enzymes of unknown specificity
DVU2008	1.3953	37.975		1.9504	99.275		1.4399	176.58		4.1817	235.17		3.9768	227.43		4.0684	182.48		hypothetical protein		Hypothetical proteins
DVU1878				2.5394	254.85	4				4.1789	1652.2	8.5	5.2441	1172.1	16	3.3438	741.06	9	threonine aldolase, low-specificity (ltaE)	4.1.2.5	Energy metabolism	Amino acids and amines
DVU0314	2.3214	215.23		2.0708	171.13		2.207	257.43		4.1766	3563.6		4.6861	2318.7		3.0041	1081.2		flagellar basal body component FliE (fliE)		Cellular processes	Chemotaxis and motility
DVU1694	2.0055	204.4		2.1671	235.97		1.8264	191.17		4.1762	695.64		3.6423	609.78		2.5668	2328.5		C4-type zinc finger protein, DksA/TraR family		Unknown function	General
DVU1518	1.5597	74.25		1.8922	97.95		2.4338	443.9		4.1761	225.59		3.6517	301.3		2.8782	269.86		transcriptional regulator cI, truncation		Disrupted reading frame
DVU3004	3.119	169.9		2.6146	161.85		2.4043	96.25		4.1757	1766.7		6.3639	1269.6		3.3773	702.51		radical SAM domain protein		Unknown function	Enzymes of unknown specificity
DVUA0113	7.6981	547.55		4.0379	461		5.0607	358.88		4.1755	4656.2		5.6173	3463.3		1.277	960.97		type III secretion protein, YscD family		Protein fate	Protein and peptide secretion and trafficking
DVU0717	1.7461	154.5		3.2159	182.65		6.5438	295.18		4.1751	787.38		6.9606	862.97		3.0309	739.57		GGDEF domain/EAL domain protein		Unknown function	General
DVU0359	3.1253	1405.6		10.018	1747.6		3.3603	673.1	1.66667	4.1741	811.99		4.509	751.24		4.5597	544.1		HesB-like domain		Unknown function	General
DVU0946	1.688	90.9		3.1771	77.35		2.8002	78.55		4.1733	2021.2		7.5212	1908.9		3.5718	1233.7		sigma-54 dependent transcriptional regulator/response regulators		Regulatory functions	DNA interactions
DVU1759	2.279	250.87		2.534	249.83		1.9387	225.07		4.1664	1144.1		4.9148	1259.8		3.0699	1369.8		molybdenum-binding protein, HTH domain		Unknown function	General
DVU0992	3.2607	350.33					2.5017	480.75		4.1652	1749.8	3	6.7427	1855.9	2.5	2.4457	686.38	3	chemotaxis protein CheV (cheV-3)		Cellular processes	Chemotaxis and motility
DVUA0114	2.5879	426.98	1.33333	1.9924	199.57		1.7758	324.6	1.33333	4.1613	5670.7		3.6174	3651.4		2.6479	1023.9		hypothetical protein		Hypothetical proteins
DVU2077	5.3597	597.05	12.6667	3.7753	351.13	11.6667				4.1586	513.17	26	5.5317	638.18	54.5	2.9936	326.52	18	conserved hypothetical protein		Hypothetical proteins	Conserved
DVU3323	2.9885	143.72		3.3093	183.2		3.8957	119.35		4.157	671.81		4.505	675.93		1.8267	570.12		ABC transporter, permease protein		Transport and binding proteins	Unknown substrate
DVU0854	4.9588	912.43		4.8774	906.95		2.2011	371.47		4.1567	4932.7		5.6419	4098.5		2.587	1512.9		NirD protein, putative		Biosynthesis of cofactors, prosthetic groups, and carriers	Heme, porphyrin, and cobalamin
DVU0405	3.3307	269		2.5468	289		3.5178	245.75		4.1526	650.59		4.1592	594.71		3.6458	855.3		cobyrinic acid a,c-diamide synthase (cobB-1)		Biosynthesis of cofactors, prosthetic groups, and carriers	Heme, porphyrin, and cobalamin
DVUA0064	3.4044	105.48		2.3247	154.55		3.6222	134.55		4.1506	374.62		2.7849	345.86		2.9528	268.38		conserved domain protein		Hypothetical proteins	Domain
DVU1164	0.85884	57.2		2.6284	140.47		4.2494	176.38		4.1496	391.39		7.4943	379.64		3.6165	407.81		aliphatic amidase (amiE)	3.5.1.4	Energy metabolism	Other
DVU1132	1.3278	39.075		2.3688	88.175		0.93292	41.05		4.1422	325.23		4.9183	319.16		2.5466	456.45		conserved hypothetical protein		Hypothetical proteins	Conserved
DVU2066	3.5815	208.05		2.4616	198.95		3.4963	237.4		4.1417	7119.7		14.419	12732		6.712	15330		site-specific recombinase, phage integrase family		DNA metabolism	DNA replication, recombination, and repair
DVU1712	3.9198	137.13		3.8805	221.48		2.6509	183.35		4.1384	339.79		4.4582	347.41		3.7942	350.26		hypothetical protein		Hypothetical proteins
DVUA0111	2.5711	200.62		2.5052	178.98	4				4.1353	4282		4.9779	2957.2		2.848	1347.3		type III secretion system protein, IpaC family, putatives		Protein fate	Protein and peptide secretion and trafficking
DVU1638	3.2496	425.82		2.2863	230.55		5.9559	1017		4.1346	2834.8		5.8875	3157.9		4.0256	3264		conserved domain protein		Hypothetical proteins	Domain
DVU3161	4.2701	578.85		2.8348	367.4		5.1938	549.42		4.1345	4163.2	2	8.07	3641.7	1	2.4188	1814.9	2	ABC transporter, ATP-binding protein		Transport and binding proteins	Unknown substrate
DVUA0090	2.525	219.72		2.1088	195		2.5421	216.52		4.1342	315.73		3.5809	460.94		2.4188	394.15		membrane protein, putative		Cell envelope	Other
DVU3374	1.9614	96.875		2.6159	148.93		2.053	145.55		4.1332	4714.1		5.7194	1773.4		2.286	1172.8		permease, putative		Transport and binding proteins	Unknown substrate
DVU2552	5.3934	207.72	4	3.5806	150.38	6.66667	5.1978	173.5	4.66667	4.1326	3619.4	16	7.7348	2503	30	4.7416	2132.5	5.5	glutamyl-tRNA synthetase (gltX-2)	6.1.1.17	Protein synthesis	tRNA aminoacylation
DVU0024	1.9782	214.35		2.2694	266.6		1.9585	388.85		4.1316	3158		11.491	11012		13.569	12200		conserved hypothetical protein		Hypothetical proteins	Conserved
DVU1521	2.0987	279.98		1.9749	273.8		3.0439	798.98		4.1295	4469.5		4.1412	3952.5		5.2972	4242.2		hypothetical protein		Hypothetical proteins
DVU0668	2.5013	127.85		2.1393	108.15		8.2861	222.6		4.1291	1878.2	17.5	3.8834	921.02	9.5	2.4803	849.48	9	methyl-accepting chemotaxis protein		Cellular processes	Chemotaxis and motility
DVU2032	2.7715	206.53		2.4687	273.58		3.308	294.57		4.1221	6539.7		6.5665	4009.2		1.8051	2006.1		ERF family protein		Unknown function	General
DVU0522	2.2827	460.9		2.4054	416.23		2.1876	458.82		4.121	6639.5	6	4.1202	4661.2	2.5	2.4949	1267.4	1	conserved hypothetical protein		Hypothetical proteins	Conserved
DVU3154	3.797	328.83		2.5144	175.5	1.33333	2.5194	244.32		4.1201	3711.8		4.9751	2028.9		2.5754	1060.6		HAM1 family protein		Unknown function	General
DVU0093	2.4527	107.75		2.1854	73.375		5.3389	130.27		4.1177	1729.1		4.3213	1253.3		3.7705	1007.2		conserved domain protein/glycosyl transferase, group 1 family proteins		Cell envelope	Biosynthesis and degradation of surface polysaccharides and lipopolysaccharides
DVU2567	2.5275	229.32		2.3878	225.65		2.1245	211.65		4.1139	461.29		5.0265	376.58		2.6799	335.43		conserved hypothetical protein		Hypothetical proteins	Conserved
DVU1586	2.7923	644.42		2.2879	345.15		2.4932	375.55		4.1129	1948.8		5.3208	1505		3.3627	1295.3		thioredoxin family protein		Energy metabolism	Electron transport
DVU3143	2.5603	74.75		2.0581	146.83		3.4082	175.33		4.112	400.66		3.7577	505.68		2.0905	275.83		iron-sulfur cluster-binding protein		Energy metabolism	Electron transport
DVU2710	7.2186	207.2		2.7072	176.32		2.418	199		4.1113	318.3		4.9957	288.94		2.135	284.63		conserved hypothetical protein		Hypothetical proteins	Conserved
DVU3018	3.0181	226.25		3.3558	302.9		4.0076	308.93		4.1094	2436.3	1	5.7476	1502.4	2.5	3.8546	663.23	2	radical SAM domain protein		Unknown function	Enzymes of unknown specificity
DVU2121	2.1515	113.5		2.4671	126.02		2.7335	198.18		4.1085	475.05		4.76	592.79		3.6411	222.25		response regulator		Regulatory functions	Protein interactions
DVU2200	1.9731	189.85		2.0981	290.33		2.2141	382.95		4.1062	5909.6		4.4291	4311.2		3.658	3866.5		hypothetical protein		Hypothetical proteins
DVU2320	3.1864	243.9		2.3091	169.02		7.4077	279.52		4.103	4136.4	4	5.2329	3022.6	6.5	2.8945	2870.6	2	3-octaprenyl-4-hydroxybenzoate carboxy-lyase family proteins		Biosynthesis of cofactors, prosthetic groups, and carriers	Menaquinone and ubiquinone
DVU0834	1.9597	123.1		2.27	182.12		1.6521	232.25		4.1	3771.5		5.7313	2795.5		12.174	13860		ribonuclease HII (rnhB)	3.1.26.4	Transcription	Degradation of RNA
DVU0816	0.94708	67.1		2.1353	108.15		3.2814	98.9		4.0997	709.82		3.9809	806.82		2.3721	691.53		cobyric acid synthase CobQ (cobQ)		Biosynthesis of cofactors, prosthetic groups, and carriers	Heme, porphyrin, and cobalamin
DVU3361	1.9052	132.42		2.1304	134.73		1.8413	140.28		4.0993	1188.2		4.6648	1082.4		2.045	565.93		ADP-heptose synthase, putative		Cell envelope	Biosynthesis and degradation of surface polysaccharides and lipopolysaccharides
DVU1314	7.3324	3453.2		6.478	1557.2		3.5314	1182.1		4.0992	1779.9	11	6.3606	1683.3	6	4.7976	2161.4	11	ribosomal protein L24 (rplX)		Protein synthesis	Ribosomal proteins: synthesis and modification
DVU1234	1.9811	126.95		2.0315	121.12		2.5471	122.43		4.099	267.08		3.5165	237.93		3.079	247.3		membrane protein, putative		Cell envelope	Other
DVU1733	1.4041	37.575		1.9278	125.45		1.1274	112		4.0913	205.98		3.6527	304.15		4.1584	207.57		hypothetical protein		Hypothetical proteins
DVU1545	0.23272	305.32		11.044	371.17		22.428	205.78		4.0884	4843.4	14	6.9161	2383.9	9	1.362	1394.5	11.5	hemolysin-type calcium-binding repeat/calx-beta domain proteins		Unknown function	General
DVU1580				2.4821	753.4	1.66667	2.5898	418.1		4.0877	5391	10	3.9633	4686.4	7	4.0114	3321.7	39.5	ribose 5-phosphate isomerase, putative		Energy metabolism	Pentose phosphate pathway
DVU0294	6.8854	158.53		1.9468	167.87		3.7912	68.425		4.0866	1074.5		2.4426	1034.5		3.1505	726.82		glycosyl transferase, group 2 family protein		Cell envelope	Biosynthesis and degradation of surface polysaccharides and lipopolysaccharides
DVU3308	2.8861	667.7		2.3331	317.92		2.7875	305.15	1.66667	4.0847	12204	3	8.95	13506	4	14.247	22076	1	metallo-beta-lactamase family protein		Unknown function	Enzymes of unknown specificity
DVU1106	1.7968	63.7		2.466	74.175		1.5956	170.77		4.082	293.69		3.8563	319.62		2.7193	375.74		hypothetical protein		Hypothetical proteins
DVU0784	1.9485	248.28		2.1775	284.37		1.8272	167.05		4.0797	3902.9	2.5	3.4875	2477.6	3	3.4374	1010.9	2.5	conserved hypothetical protein		Hypothetical proteins	Conserved
DVU0646	2.6452	253.42		2.0953	175.95		1.9176	159.9		4.0736	2939.5	5	4.375	1877.5	7.5	2.4754	697.07	5.5	precorrin-2 C20-methyltransferase (cobI)	2.1.1.130	Biosynthesis of cofactors, prosthetic groups, and carriers	Heme, porphyrin, and cobalamin
DVU1654	2.5242	240.37		2.3158	265.07		1.7597	160.93		4.0715	860.86		4.7814	1165.9		2.0389	722.1		site-specific recombinase, phage integrase family		DNA metabolism	DNA replication, recombination, and repair
DVU2260	3.0427	391.8		3.1221	376.52		2.1395	301.92		4.0665	3127.2		7.0778	3627.9		3.9479	2551.4		ribosomal RNA large subunit methyltransferase J (rrmJ)s	2.1.1.-	Protein synthesis	tRNA and rRNA base modification
DVU1118	3.6791	145.1		2.5775	140.97		2.1089	194.97		4.0656	431.64		4.8684	480.01		2.4002	349.74		conserved hypothetical protein		Hypothetical proteins	Conserved
DVU1432	2.1868	192.2		4.9324	244.7		5.5633	129.1		4.0653	1555.5	1.5	7.5395	1556.3	2.5	4.1224	1033	1	radical SAM domain protein		Unknown function	Enzymes of unknown specificity
DVU1049	2.9313	315.53		3.3789	373.13		2.1337	182.92		4.0636	3865.6	1	6.4036	4287.5	2	3.2396	1735.1	2	ABC transporter, ATP-binding protein		Transport and binding proteins	Unknown substrate
DVU0282	2.7684	276.03		2.4843	335.25		2.3089	289.83		4.0633	1682.3		5.6994	1506.5		2.2573	841.22		A/G-specific adenine glycosylase (mutY)	3.2.2.-	DNA metabolism	DNA replication, recombination, and repair
DVU1266	9.367	160.6		5.0171	192.6		12.408	148.88		4.0611	1255.9		3.9502	1123.5		3.9827	643.41		hypothetical protein		Hypothetical proteins
DVU1321	4.8607	2779		4.9123	1675.5		3.6749	1309.5		4.0589	3885.9	8	4.4542	2221.7	10	5.1522	4401.9	5	ribosomal protein L30 (rpmD)		Protein synthesis	Ribosomal proteins: synthesis and modification
DVU0495	4.3117	305.02		2.4015	303.68		1.9658	191.5		4.0565	4074.4		5.5879	2855.8		2.7877	1778		conserved hypothetical protein		Hypothetical proteins	Conserved
DVU2750	2.1252	62.525		1.9216	43.9		1.7334	86.125		4.054	977.44		3.9468	1013.9		2.506	701.53		cobalamin biosynthesis protein CbiD (cbiD)		Biosynthesis of cofactors, prosthetic groups, and carriers	Heme, porphyrin, and cobalamin
DVU2455	2.7463	525.6		2.6117	447		3.8227	563.68		4.0495	4315	1	4.4136	3527.7	1	3.1617	1882.2	1	NAD-dependent epimerase/dehydratase family protein		Cell envelope	Biosynthesis and degradation of surface polysaccharides and lipopolysaccharides
DVU2991	2.241	185.3		2.268	259.98		3.0102	329.55		4.0476	4658.4		4.9757	3503.1		2.5206	1628.4		hypothetical protein		Hypothetical proteins
DVU2742	1.7784	195.9		2.7588	259.48		3.6423	256.52		4.0434	750.84		3.5175	596.46		2.9363	769.33		high-affinity branched chain amino acid ABC transporter, permeasesprotein (livM)		Transport and binding proteins	Amino acids, peptides and amines
DVU2327	1.8618	118.47		2.0296	132.6		1.9551	132.48		4.0407	557.29		5.2643	455.23		2.7798	336.92		hypothetical protein		Hypothetical proteins
DVUA0136	1.869	91.775		2.4185	89.075		2.5468	149.07		4.0385	616.65		3.2919	673.57		3.885	346.83		zinc transporter (zupT)		Transport and binding proteins	Cations
DVUA0081	2.1308	153.3		2.2657	133.78		4.9738	187.37		4.037	1344.6		4.7559	1373.5		2.3204	468.29		glycosyl transferase, group 1/2 family protein		Cell envelope	Biosynthesis and degradation of surface polysaccharides and lipopolysaccharides
DVU3141	2.1452	169.6		2.0664	226.13		1.4676	106.22		4.0349	5662.9		3.7872	2884.1		3.1843	1650.8		lipoprotein, putative		Cell envelope	Other
DVU0342	7.9713	1264.6					3.2802	623.35	1	4.0348	3910	3	10.012	3898.5	6.5	5.4124	2131.4	4	NAD-dependent epimerase/dehydratase family protein		Cell envelope	Biosynthesis and degradation of surface polysaccharides and lipopolysaccharides
DVU0869	2.8942	284.47		2.0562	163.52		1.4974	116.9		4.0312	3322.4		4.3189	1667.6		2.8516	1354.1		undecaprenyl diphosphate synthase (uppS)	2.5.1.31	Cell envelope	Biosynthesis and degradation of surface polysaccharides and lipopolysaccharides
DVU3299	7.6335	582.37		2.2592	176.27		4.0835	172.35		4.0304	5280.7		4.9551	1435.9		3.7382	1260.8		membrane protein, putative		Cell envelope	Other
DVU1987	1.256	239.7		3.7128	212.82		6.1051	224.63		4.0276	1219.1	3	4.2279	1037.3	2.5	3.0813	690.01	3.5	excinuclease ABC, A subunit (uvrA)		DNA metabolism	DNA replication, recombination, and repair
DVU2476	4.594	342.27		3.1776	345.18		3.0559	279.63		4.0268	1976.8	2.5	5.4873	1754.2	6	4.1005	981.05	3	glutamate synthase, small subunit (gltA)	1.4.1.13	Amino acid biosynthesis	Glutamate family
DVU1996	2.3454	269.7		2.0728	269.75		3.7838	1010.9		4.023	248.5		3.3555	204.5		3.0429	229.17		quaternary ammonium compound-resistance protein QacC, putatives		Cellular processes	Toxin production and resistance
DVU0658	1.7544	109.22		2.3093	106.83		1.4364	141.1		4.0228	275.6		4.6987	216.18		3.702	234.64		heat shock protein, Hsp20 family		Protein fate	Protein folding and stabilization
DVU0961	0.82025	155.1		3.6835	67.625		5.9143	144.63		4.0225	1559.8	1	2.4553	1530.6	3	1.7612	724.55	4	conserved hypothetical protein		Hypothetical proteins	Conserved
DVU3059	4.763	167.95		3.8834	152.98		3.7458	169.22		4.0213	3533.3		7.1618	2724.1		3.0232	1907		signal recognition particle-docking protein FtsY (ftsY)s		Protein fate	Protein and peptide secretion and trafficking
DVU3279	2.97	209		2.3532	241.15		2.0871	158.6		4.0211	2664.5	2	4.422	2054.4	2	2.5468	992.52	1.5	nicotinate-nucleotide--dimethylbenzimidazolesphosphoribosyltransferase (cobT)	2.4.2.21	Biosynthesis of cofactors, prosthetic groups, and carriers	Heme, porphyrin, and cobalamin
DVU2990	4.1606	366.5	10.3333	2.6108	338.55	7.66667	4.2034	371.3	12	4.0196	1758.3	21.5	4.3205	1296.9	15.5	4.0887	1318.3	15	molybdopterin biosynthesis MoeA protein (moeA)		Biosynthesis of cofactors, prosthetic groups, and carriers	Molybdopterin
DVU1425	4.6677	393.22	5	2.8328	414.68	4.33333	4.1038	362.2	4	4.0195	3535.6	1.5	6.9062	3620.1	11.5	3.9103	2878.1	3	glycine cleavage system P protein, subunit 1 (gcvPA)	1.4.4.2	Energy metabolism	Amino acids and amines
DVU0867	3.5919	173.33		2.3206	157.47		2.6603	167.43		4.0187	3334.6		4.1723	2077.6		2.3437	1429.2		aromatic amino acid decarboxylase, putative		Energy metabolism	Amino acids and amines
DVU1475	0.58033	33.5					4.431	173.25		4.0182	1619.4	1	5.6331	1351.4	2.5	3.8745	1200.8	1	PhoU family protein		Unknown function	General
DVU0599	5.5709	660.48		3.9003	770.28		4.2129	295.63		4.0117	3489.7	2.5	11.299	3268	6.5	3.6752	916.02	1	carbon starvation protein A, putative		Cellular processes	Adaptations to atypical conditions
DVU0659	2.8652	456.25		2.9543	430.13		2.6212	329.13		4.0091	3443.5	5	4.3173	1954.7	4	1.9157	1505	3	hypothetical protein		Hypothetical proteins
DVU2807	1.997	130.3		2.3002	147.87		1.116	85.675		4.0017	759.62		4.4231	654.05		3.1314	383.64		biopolymer transport protein, ExbD/TolR family		Transport and binding proteins	Other
DVU0978				3.3483	192.37		3.8253	418.17	4.33333	4.0014	1592.2		7.2977	1394.8		3.7446	666.4		ABC transporter, periplasmic substrate-binding protein, putatives		Transport and binding proteins	Unknown substrate
DVUA0117	3.359	189.63		2.7762	180.03		2.5637	173.2		3.9997	2814.9	4	6.144	2710.9	2	2.9445	1268.2	17	type III secretion lipoprotein (escJ)		Protein fate	Protein and peptide secretion and trafficking
DVU0930	2.656	207.42		2.2177	172.28		2.3896	168.97		3.9949	1428.6		5.4388	1562.9		4.2063	2747.5		glutamate 5-kinase (proB)	2.7.2.11	Amino acid biosynthesis	Glutamate family
DVU2904	3.5546	251		2.9836	211.83		3.9478	199.75		3.9945	2327.9	1	7.8408	2389.6	1	2.8151	1770.3	1	radical SAM enzyme, Cfr family		Unknown function	Enzymes of unknown specificity
DVUA0012	0.49843	92.6		2.6401	43.75		2.6025	64.4		3.9898	332.19		6.3512	411.26		2.8683	354.43		nitrogenase molybdenum-iron protein alpha chain (nifD)	1.18.6.1	Central intermediary metabolism	Nitrogen fixation
DVU0722							4.8106	478.83	4	3.9889	1021.3		5.7823	1378.2		2.3416	696.85		response regulator		Regulatory functions	Protein interactions
DVU0981	6.1067	243.1		4.299	220.28		11.727	241.68		3.9847	1713.6	1.5	4.0762	1882.6	4	4.4953	788.87	8	multiphosphoryl transfer protein, putative		Transport and binding proteins	Carbohydrates, organic alcohols, and acids
DVUA0014	2.2744	221.42		2.0656	164.78		1.7225	180.93		3.9841	300.47		4.3932	421.21		2.7812	298.29		nitrogen regulatory protein P-II (glnB-3)		Central intermediary metabolism	Nitrogen metabolism
DVU1863	2.6475	237.13		2.1076	240.17		1.7854	226.8		3.9809	3300.6		5.0824	2822.9		3.2055	2677.3		flagellar synthesis regulator FleN, putative		Cellular processes	Chemotaxis and motility
DVU2877	1.3679	61.5		2.7037	60.1		1.2647	97.55		3.9809	669.09		5.3721	771.13		2.8306	562.85		hypothetical protein		Hypothetical proteins
DVU3157	3.4656	242.8		2.4247	235.13		5.7749	274.9		3.9793	2803.1		6.7916	2342.3		3.5374	1299.7		conserved hypothetical protein		Hypothetical proteins	Conserved
DVU2061	3.98	600								3.9755	451.76	22.5	6.7558	773.48	29.5	3.6447	580.93	23.5	6-phosphofructokinase (pfkA)	2.7.1.11	Energy metabolism	Glycolysis/gluconeogenesis
DVUA0022	2.2475	167.72		2.5468	112.3		3.0924	235.78		3.9732	735.54		3.5886	930.41		2.1336	625.78		ABC transporter, ATP-binding protein		Transport and binding proteins	Unknown substrate
DVU1193	1.9262	158.78		2.2183	216.1		1.666	202.9		3.9727	1717.6		5.2444	1372		3.0198	1196		DNA repair protein RadC (radC)		DNA metabolism	DNA replication, recombination, and repair
DVU2724	2.3239	112.2		2.4017	88.1		2.1363	247.7		3.9713	357.69		3.4833	336.24		2.5677	358.86		phage baseplate assembly protein V, putative		Other categories	Prophage functions
DVU2068	1.6582	99.725		2.9094	193.27		2.9246	150.52		3.9698	2171.6	1	8.0107	2495.7	2	4.135	1459.2	2	HD domain protein		Unknown function	General
DVU0760	2.5926	142.17		2.0317	193.65		1.6471	115.45		3.9697	1859.7		5.0322	1554.1		2.2709	996.75		hypothetical protein		Hypothetical proteins
DVU1722	2.127	226.1		2.1081	152.28		1.6862	236.05		3.9692	278.81		3.5661	307.26		3.3306	287.06		hypothetical protein		Hypothetical proteins
DVU2161	2.0332	130.75		2.3618	151.95		1.3607	66.25		3.9662	326.44		4.1248	327.58		3.5866	358.58		hypothetical protein		Hypothetical proteins
DVU1686	2.8077	163.2		3.0808	205.15		4.7481	196.58		3.9593	2146.3		8.1159	1688.4		3.7727	708.97		ATPase, AAA family		Unknown function	General
DVU1770	3.3925	609.92	5.66667	2.8121	476.17	4.66667	4.5841	1105.6	9	3.9555	1703.8		5.881	1060.3		2.6241	720.07		periplasmic [Fe] hydrogenase, small subunit (hydB)	1.18.99.1	Energy metabolism	Electron transport
DVU2916	2.2055	152.85		2.3445	208.25		2.6975	262.95		3.9534	1014.8		6.824	1074.3		3.1642	1295		hemK protein (hemK)		Unknown function	General
DVU2379	16.6	204.83		5.8592	264.38		5.4427	186.78		3.9525	1461.5		4.9802	1566.1		1.9165	554.87		peptidase, M16 family, putative		Protein fate	Degradation of proteins, peptides, and glycopeptides
DVU2141	3.3823	287.8		3.4225	200.75		3.8987	233.38		3.952	3138.2		7.4266	2589.6		4.0281	1678.8		nucleic acid-binding protein, putative		Unknown function	General
DVU2969	2.6831	247.9		3.4808	183.05					3.9506	1142.1		6.3295	1400.6		2.9656	1367.2		acetoacetyl-CoA synthase	6.2.1.1	Fatty acid and phospholipid metabolism	Biosynthesis
DVU1115	2.0842	252.38		2.1963	332.07		1.2024	105.3		3.9499	230.3		3.6123	259.81		3.0516	259.71		conserved hypothetical protein		Hypothetical proteins	Conserved
DVU3330	2.122	185.65		2.3208	291.5		1.6017	158.27		3.9489	3251.3		4.2014	2184.7		4.7531	3348.4		conserved hypothetical protein		Hypothetical proteins	Conserved
DVU2123	2.3458	178.62		2.1669	183.35		2.0528	237.3		3.9484	1005.4		4.2442	849.68		2.3517	741.2		membrane protein, putative		Cell envelope	Other
DVU2430							3.0716	377.85	4.33333	3.9372	5468.1	3	4.247	3176.1	1	3.728	1520.6	3.5	RNA-binding protein		Unknown function	General
DVU0937	2.0728	208.13		2.0066	137.6		1.793	177.7		3.9367	4768.2		4.2242	3679.3		3.7186	2436.8		hypothetical protein		Hypothetical proteins
DVU1766	3.1135	239.75		2.4287	325.7		2.7439	261.12		3.9351	672.36		4.2893	902.49		1.7495	1010.4		aspartate ammonia-lyase, putative		Energy metabolism	Amino acids and amines
DVU0365	2.651	219.8		2.0462	219.35		1.738	165.3		3.9325	294.04		4.128	288		2.014	366.42		conserved hypothetical protein		Hypothetical proteins	Conserved
DVU0894				2.1078	122.43	1.66667	1.9221	124.28	4	3.9311	827.05	2	5.0411	777.45	4.5	3.4701	702.6	3	chorismate synthase (aroC)	4.6.1.4	Amino acid biosynthesis	Aromatic amino acid family
DVU2332	2.4155	168.05		2.157	162.95		2.1651	185.65		3.9268	2434.2	8	5.8072	2757.4	8.5	3.5099	2459.3	11.5	pyrroline-5-carboxylate reductase (proC)	1.5.1.2	Amino acid biosynthesis	Glutamate family
DVU1442	2.9499	322.6		2.605	356.65		2.9247	391.7		3.9254	1958.1		5.6121	2659.9		3.9575	2112.1		flagellin FlaG, putative		Cellular processes	Chemotaxis and motility
DVUA0004	2.132	230		2.1766	158.4		1.0446	94.4		3.9218	1915.2		4.7956	1406		2.7685	1732.5		DNA-binding protein HU, putative		DNA metabolism	Chromosome-associated proteins
DVU2711	2.9148	174.47		2.6614	159.78		2.7055	150.52		3.9206	328.44		4.3667	390.97		2.6072	335.12		major head subunit, putative		Other categories	Prophage functions
DVUA0015	2.2773	227.05		2.3357	270.6		2.4894	197.28		3.9174	209.75		4.4129	269.32		3.1799	228.7		nitrogenase iron protein (nifH)	1.18.6.1	Central intermediary metabolism	Nitrogen fixation
DVU2566	1.7606	106.75		2.1606	127.43		2.0628	149.42		3.9147	832.68	2	4.7205	502.98	1.5	3.364	322.84	1	diaminopimelate decarboxylase (lysA-2)	4.1.1.20	Amino acid biosynthesis	Aspartate family
DVU2669	3.5848	1988.3	5	2.7098	806.75	4.66667	2.4587	757.67	5	3.9029	3676.9	3	4.5663	4878.7	18	4.7291	5786.7	2	conserved domain protein		Hypothetical proteins	Domain
DVU1645	2.1831	254.97		2.0962	237.5		2.999	588.72		3.901	5063.7		7.2156	7075.6		14.028	23482		transcriptional regulator, ArsR family		Regulatory functions	DNA interactions
DVU1440	1.5937	81.35		2.6931	81.375		1.777	73.375		3.901	2908.5		7.9221	3049.7		2.8343	2916.5		ribonuclease III (rnc)	3.1.26.3	Transcription	RNA processing
DVUA0065	4.7906	267.87		3.6611	370.6		2.6007	175.03		3.8977	484.25		3.5172	487.65		2.197	280.08		sensor histidine kinase		Regulatory functions	Protein interactions
DVU2763	2.4923	147.23		3.3055	154.07		10.171	165.17		3.8977	2481.5	3	6.044	1887.9	7.5	6.9267	1112.6	4	TPR/GGDEF domain protein		Unknown function	General
DVU3247	4.4657	291.8		3.3832	189.2		6.2669	357.05		3.8963	1773.3		6.4672	1407.2		3.4427	652.04		efflux transporter, RND family, MFP subunit		Transport and binding proteins	Unknown substrate
DVU2095	2.9769	396.62		2.4598	296.15		2.0413	216.42		3.8937	292.93		3.4291	285.13		2.6741	334.79		thiamine biosynthesis protein ThiS (thiS)		Biosynthesis of cofactors, prosthetic groups, and carriers	Thiamine
DVU0215	2.3645	95.4		2.7765	67.65		1.9066	112.22		3.8914	709.15		4.9779	787.24		2.9493	375.3		tail protein, putative		Other categories	Prophage functions
DVU0484	2.2476	216.98		2.4158	132.03		2.4725	192.52		3.8912	719.16		3.5464	748.77		1.756	612.14		ABC transporter, ATP-binding protein		Transport and binding proteins	Unknown substrate
DVU0595				2.3987	595.25	1.66667				3.8902	8800.5	6.5	3.8641	7373.1	10	4.3014	6115	6	conserved hypothetical protein		Hypothetical proteins	Conserved
DVU3006	3.4624	223.73		2.1788	175.43		1.9823	194.6		3.8893	6408.9		5.671	5621.6		3.157	5637.9		polysaccharide biosynthesis protein/methyltransferase, putatives		Cell envelope	Biosynthesis and degradation of surface polysaccharides and lipopolysaccharides
DVU2704	2.8157	240.9		2.5484	205.85		1.3334	128.17		3.8891	335.7		4.9362	313.83		3.1567	349.55		conserved hypothetical protein		Hypothetical proteins	Conserved
DVU0751	1.8526	245.68		3.5142	227.3		5.1395	326.77		3.8877	1607		7.3864	1004.3		4.1206	955.79		amino acid ABC transporter, permease protein, His/Glu/Gln/Arg/opinesfamily		Transport and binding proteins	Amino acids, peptides and amines
DVU3054	4.0055	291.22		3.3849	332.85		4.4659	236.8		3.8861	10495		6.62	11731		3.3741	6073.1		radical SAM domain protein		Unknown function	Enzymes of unknown specificity
DVU2582				7.1036	1136.8	7.33333	4.0054	854.5	5	3.885	1449.6	15	6.017	1224.6	17.5	4.1242	561.63	11.5	transcriptional regulator, TetR family		Regulatory functions	DNA interactions
DVU1547	3.2504	345.88		3.3281	286.25		5.6486	340.6		3.8831	864.68		6.5429	696.37		2.9374	466.81		sensory box protein		Regulatory functions	Small molecule interactions
DVU2149	4.8201	270.2		3.2905	344.85		3.1167	179.45		3.8784	1012.4		4.276	1046.5		2.443	535.04		conserved hypothetical protein		Hypothetical proteins	Conserved
DVU2282	2.5106	101.25		2.4279	171.22		2.4984	114.05		3.8782	2572.4		5.0534	1651.7		1.4282	963.79		hypothetical protein		Hypothetical proteins
DVU3169	4.2301	251.47		2.6238	255.65		2.5792	220.93		3.8773	647.6		3.9356	717.16		2.1091	629.87		cobalamin biosynthesis protein CbiG (cbiG)		Biosynthesis of cofactors, prosthetic groups, and carriers	Heme, porphyrin, and cobalamin
DVU1554	4.1139	267.78		2.0655	298.88		4.9571	199.1		3.8757	1413.3		5.0604	1278.6		2.0783	1038.2		radical SAM domain protein		Unknown function	Enzymes of unknown specificity
DVU2021	2.1555	191.55		2.0318	270.65		3.4083	501.12		3.8738	3080.8		6.4398	4215.2		3.4467	2103.8		hypothetical protein		Hypothetical proteins
DVU0044	2.8737	172.28		2.214	200.03		2.5705	291.95		3.8734	2826.1		5.3464	2703.1		2.7118	1615.6		flagellar biosynthetic protein fliP (fliP)		Cellular processes	Chemotaxis and motility
DVU1200	2.7882	322.55		2.4624	365.4		2.7893	294.42		3.8731	4980.2		5.8154	5439.2		6.7486	5079.6		riboflavin synthase, alpha subunit (ribE)	2.5.1.9	Biosynthesis of cofactors, prosthetic groups, and carriers	Riboflavin, FMN, and FAD
DVU2739	11.233	464.53		5.5383	404.35		4.1236	492.73		3.8707	1440.9		6.9259	1107.9		2.8797	520.75		pyruvate phosphate dikinase, PEP/pyruvate binding domain proteins		Unknown function	General
DVU1265	2.6166	129.48		2.2831	170.12		2.9094	240.37		3.87	845.92		5.1775	1076.2		3.1117	719.18		hypothetical protein		Hypothetical proteins
DVU0913	2.4236	329.1		2.4793	434.08		1.8018	343.97		3.8693	1965.6		5.0319	1672.6		2.5792	805.23		conserved hypothetical protein		Hypothetical proteins	Conserved
DVU2501	3.9309	496.03		2.2716	244.42		2.059	308.85		3.8691	2330.7		4.3297	1558.7		2.6835	1154.5		cell division protein FtsQ, putative		Cellular processes	Cell division
DVU0555	2.1981	266		1.8653	222.85		2.1489	516.95		3.8686	5830.4		5.437	7181.1		5.834	6533.8		hypothetical protein		Hypothetical proteins
DVU3230	2.8901	398.8		2.3855	281.2		2.1101	287.45		3.8684	2040		6.025	2547.4		2.7051	920.59		flagellar synthesis regulator FleN		Cellular processes	Chemotaxis and motility
DVU1161	1.5737	87.925		2.0061	149.72		2.1156	378.35		3.866	335.43		4.3223	412.84		2.9565	411.61		hypothetical protein		Hypothetical proteins
DVU2564	2.6016	82.75		1.9396	95.35		2.2376	93.275		3.8651	609.02		3.3114	738.24		1.9444	673.06		8-amino-7-oxononanoate synthase, putative		Biosynthesis of cofactors, prosthetic groups, and carriers	Biotin
DVU1774	2.376	170.25		2.3316	232.2		1.8048	205.85		3.8609	2050.4		6.4875	2485.6		2.4437	1497.3		hypothetical protein		Hypothetical proteins
DVU0744	3.557	213.27		3.3599	138.85		2.6443	68.525		3.8599	1553		6.121	1750		2.6786	731.77		sigma-54 dependent transcriptional regulator/response regulators		Regulatory functions	DNA interactions
DVU1940				2.8199	267.82		3.4363	310.95	1.66667	3.8579	924.91	1	4.9936	787.24	4	3.523	509	2.5	anaerobic glycerol-3-phosphate dehydrogenase, A subunit, putatives		Energy metabolism	Anaerobic
DVU2432	2.1141	290.35		7.102	237.63		3.083	138.63		3.857	276.57		2.6837	219.39		2.2611	203.39		sensory box/GGDEF domain/EAL domain protein		Regulatory functions	Small molecule interactions
DVU0998	0.93933	29.825		2.0566	40.45		1.4558	100.8		3.8552	1909.1		5.1365	1951.4		2.3756	1345.6		heptosyltransferase family protein		Cell envelope	Biosynthesis and degradation of surface polysaccharides and lipopolysaccharides
DVU2251	2.1964	195.18	2.66667	3.5773	426.98		2.2222	239.62	3.66667	3.8536	4749.5	14	5.3061	2855.4	23	4.2556	3052.6	12	DNA-binding protein		Unknown function	General
DVUA0104	1.0695	159.72		2.6616	134.82		3.1234	187.32		3.8535	1634.8		4.8364	1519.4		2.9933	464.51		type III secretion inner membrane protein, HrcV family		Cellular processes	Pathogenesis
DVU1079	1.9583	102.67		2.6594	171.68		6.3666	218.12		3.8532	887.74		3.6682	747.45		2.0707	2536.4		tRNA modification GTPase TrmE (trmE)		Protein synthesis	tRNA and rRNA base modification
DVU3294	2.0078	68.375	3				1.4808	77.375	5	3.8528	3570	3	4.9282	3670.5	3.5	1.6707	1465.8	3	aldehyde dehydrogenase (NADP) family protein		Energy metabolism	Fermentation
DVU2067	4.0023	349.55		2.9847	273.38		7.3509	304.5		3.8519	1012.4		4.1527	1200.3		2.5172	1546.8		GGDEF domain protein		Unknown function	General
DVU2119	2.9706	193.93		3.2392	160.55		4.4677	153.2		3.8515	885.1		6.1117	950.21		2.157	463.37		type II/III secretion system protein		Protein fate	Protein and peptide secretion and trafficking
DVUA0010	2.2256	271.25		1.9036	295.63		1.3917	198.8		3.8473	249.21		3.6859	342.96		2.8918	279.75		ferredoxin, 2fe-2s		Energy metabolism	Electron transport
DVU3223	3.4444	280.05		2.5737	301.9		2.6407	309.05		3.8457	1429.6		6.9984	1134.4		4.0106	571.68		aspartate aminotransferase (aspB)	2.6.1.1	Amino acid biosynthesis	Aspartate family
DVU0167	2.9618	481.6		3.5996	392.68		3.4893	449.13		3.8454	3489.9		6.4541	2235.5		3.6326	1704.9		oligopeptide/dipeptide ABC transporter, permease proteins		Transport and binding proteins	Amino acids, peptides and amines
DVU2134	1.3033	24.825		2.0821	42.75		1.3596	164.35		3.8444	220.59		3.3515	243.27		3.8226	232.09		hypothetical protein		Hypothetical proteins
DVU2209	2.3086	259.1		2.3397	258.13		1.9458	259.7		3.8442	3277.7	2	4.5489	2131.6	1	2.6127	754.05	1	conserved hypothetical protein		Hypothetical proteins	Conserved
DVU1590	3.379	178.1		2.4012	183.67		4.2953	210.2		3.8416	1010.5	2	4.0145	970.67	3.5	3.266	867.26	1	DNA repair protein RadA (radA)		DNA metabolism	DNA replication, recombination, and repair
DVU1716	2.6839	414.83		2.4201	330.25		2.775	351.1		3.841	526.63		4.2093	628.09		2.4844	748.71		hypothetical protein		Hypothetical proteins
DVU3170	2.1058	142.35		2.054	138.72		1.4157	97.925		3.8369	780.35		4.294	798.84		2.0267	764.49		precorrin-3b C17-methyltransferase (cobJ)	2.1.1.131	Biosynthesis of cofactors, prosthetic groups, and carriers	Heme, porphyrin, and cobalamin
DVU1364	2.5909	211.52		2.4743	244.03		2.7999	240.63		3.8351	1319.1	3.5	4.9578	1402.7	2.5	3.2355	720.49	3	dTDP-glucose 4,6-dehydratase (rfbB)	4.2.1.46	Cell envelope	Biosynthesis and degradation of surface polysaccharides and lipopolysaccharides
DVU1061	2.4317	176.43		2.208	225.78		2.1991	256.75		3.8272	1898.4		4.3121	1448.9		2.0738	1023		glycosyl transferase, group 1 family protein		Cell envelope	Biosynthesis and degradation of surface polysaccharides and lipopolysaccharides
DVU2074	2.9198	483.15		2.2311	324.45		2.546	414.3		3.8268	352.06		3.757	452.7		3.0494	307.93		chemotaxis protein CheW		Cellular processes	Chemotaxis and motility
DVU2440	2.6846	227.12		2.4096	237.98		2.4316	227.53		3.8238	591.17		4.1409	632.99		2.6471	407.87		hypothetical protein		Hypothetical proteins
DVU2062	12.953	164.8		3.1695	144.1		6.2174	240.08		3.8229	1041.3	1	2.8363	776.3	1.5	2.2007	921.46	1	ATP-dependent DNA helicase, UvrD/REP family		DNA metabolism	DNA replication, recombination, and repair
DVU1462	2.2097	237.42		2.4455	258.3		1.2473	154.82		3.8225	4667.8		4.7799	3087.9		2.7324	1956.3		cytochrome c assembly protein, putative		Energy metabolism	Electron transport
DVU1280	2.3237	233.43		2.2243	210.5		2.1581	140.42		3.8213	3539		4.8959	2435.2		2.3292	2098.8		conserved hypothetical protein TIGR00159		Hypothetical proteins	Conserved
DVU3020	2.4031	338.7		2.1904	249.5		2.0605	377.95		3.8208	4195.4		4.7555	3109.5		3.4232	1516.6		hypothetical protein		Hypothetical proteins
DVU2172	1.6931	98.525		2.0035	146.97		1.7484	264.18		3.8207	234.85		3.3849	444.33		3.5593	226.59		hypothetical protein		Hypothetical proteins
DVU2256	2.2528	222.13		2.2521	212.62		1.4067	145.43		3.82	3394.6		5.691	3797.1		3.9473	3721.7		Holliday junction DNA helicase RuvA (ruvA)		DNA metabolism	DNA replication, recombination, and repair
DVU0352										3.8176	2003.4	1	7.8722	1725.7	6	3.7115	777.65	1.5	aminotransferase, DegT/DnrJ/EryC1/StrS family		Unknown function	Enzymes of unknown specificity
DVU1945	3.037	278.23		2.6594	294.35		5.0516	394.78		3.8133	1808.5		5.2329	1753.7		2.159	1079		pyruvate ferredoxin oxidoreductase, alpha subunit, putatives		Energy metabolism	Anaerobic
DVU2876	1.4951	143.07		3.2495	233.35		3.1262	236.55		3.812	1264.1		6.7046	1175.8		3.1328	668.12		terminase, large subunit, putative		Other categories	Prophage functions
DVU0025	2.3355	163.65		2.6525	138.52		8.1906	210		3.8065	947.2		4.5108	1236.5		1.7063	1105.7		sensory box histidine kinase		Signal transduction	Two-component systems
DVU2595	1.055	22.3		2.6117	16.775		1.4886	136.65		3.8061	328.52		2.9551	387.14		2.5858	352.64		hypothetical protein		Hypothetical proteins
DVU1685	2.3531	168.92		2.3593	113.15		2.2075	262.62		3.804	2570.2		4.6743	2633.8		2.2732	1606.9		conserved hypothetical protein TIGR00046		Hypothetical proteins	Conserved
DVU0538	1.6601	80.95	1.66667	2.0876	49.45	3				3.8009	401.9		3.1717	462.33		2.6456	375.7		AP endonuclease, family 2		DNA metabolism	DNA replication, recombination, and repair
DVU0434	1.2761	177.22		2.7856	168.72		5.1272	468		3.7987	2085		9.9818	2648.3		8.7084	4154.8		Ech hydrogenase, subunit EchA, putative		Energy metabolism	Electron transport
DVU3220	4.0198	390.87		4.0755	339.52		4.3765	397.7		3.7962	3212.1	2.5	8.0661	3315.5	3	1.9668	1019.2	1.5	sigma-54 dependent transcriptional regulator/response regulators		Regulatory functions	DNA interactions
DVU2875	1.4432	64.075		2.2381	46.2		1.0119	68.225		3.7911	917.79		4.3252	793.41		3.6628	542.39		DNA-binding domain, excisionase family		Unknown function	General
DVU0890	4.9333	440.1	2.66667				2.3292	239.05	2.33333	3.7904	2783.5	5.5	5.9982	2460.5	5.5	2.8801	1331.1	2.5	homoserine dehydrogenase (hom)	1.1.1.3	Amino acid biosynthesis	Aspartate family
DVU1143	2.4574	229.25		2.2482	264.13		2.0943	180.45		3.7864	641.53		4.279	789.66		2.7547	596.03		hypothetical protein		Hypothetical proteins
DVU0710	2.5216	110.97		2.2853	102.28		2.5408	111.45		3.7854	2184.1		4.8635	1347.7		3.1132	1622.2		competence protein comM, putative		Cellular processes	DNA transformation
DVU1346	2.9126	163.33		2.1302	134.2		2.1103	68.125		3.7802	2961.9		4.6971	2243.6		2.5653	1804.7		exodeoxyribonuclease VII, large subunit (xseA)	3.1.11.6	DNA metabolism	Degradation of DNA
DVU1670	2.9108	475.73	6	2.4116	494.32	4.66667	2.6327	400.5	6.33333	3.7789	2346.3		4.7791	2134.5		2.1907	1145.7		conserved hypothetical protein		Hypothetical proteins	Conserved
DVU0527	2.4754	226.7		2.1993	235	1.33333	1.9998	165.98		3.7771	987.37		3.8026	778.6		2.174	899.54		septum formation protein Maf (maF)		Cellular processes	Cell division
DVU1680	2.5651	224.82		2.2625	214.27		2.5413	195.1		3.7685	3438.8		4.6952	2871.7		2.9762	1948.7		inositol-1-monophosphatase (suhB)	3.1.3.25	Cellular processes	Toxin production and resistance
DVU3388	2.1443	128.75		2.1852	132.72		2.0183	135.63		3.7671	1349.8		5.8089	1623.6		3.2246	799.52		lipoprotein, putative		Cell envelope	Other
DVU1501	1.9123	105.37		2.2731	177.17		2.5659	195.27		3.7669	574.77		4.3421	550.61		2.1892	612.81		ClpP protease family protein		Protein fate	Degradation of proteins, peptides, and glycopeptides
DVU0467	1.3031	64.925		1.9649	61.825		2.1167	99.45		3.7667	1354.2	10.5	4.5219	853.97	7.5	2.829	1842.7	6.5	anthranilate phosphoribosyltransferase (trpD)	2.4.2.18	Amino acid biosynthesis	Aromatic amino acid family
DVU3264	3.6364	384.07		2.6164	373.5		3.1368	313.9		3.7661	1566.5		4.7606	1279.8		2.5521	443.3		tartrate dehydratase alpha subunit, putative		Energy metabolism	Other
DVU1407	4.2494	258.75		4.0238	370.17		5.9309	258.6		3.7651	4443.7		10.213	5024.2		4.9455	2700		radical SAM domain protein		Unknown function	Enzymes of unknown specificity
DVU1946	1.9356	165.65		2.3239	106.62		2.5617	232.18		3.7636	1719.1		5.729	1332.7		2.7953	707.26		pyruvate ferredoxin oxidoreductase, beta subunit, putatives		Energy metabolism	Anaerobic
DVU0411	3.6195	199.05		2.1042	210.62		3.0513	244.88		3.7625	1468.7		3.6908	1289.2		2.1963	1229.1		heptosyltransferase family protein		Cell envelope	Biosynthesis and degradation of surface polysaccharides and lipopolysaccharides
DVU2706	8.168	337.85		3.7228	382.7		4.1063	254.35		3.7604	424.19		5.295	443.79		2.5111	387.16		conserved hypothetical protein		Hypothetical proteins	Conserved
DVU2715	1.9184	167.23		1.9036	171.37		1.4747	216.2		3.76	228.29		3.6272	253.58		3.2099	277.09		conserved hypothetical protein		Hypothetical proteins	Conserved
DVU0639	2.4311	270.45		2.3554	313.77		1.9945	327.53		3.7583	1558.3		4.1963	1157.9		2.8735	795.29		chemotaxis protein PomB (pomB)		Cellular processes	Chemotaxis and motility
DVU0366	2.218	108.32		1.9596	147.13		1.8662	205.83		3.7571	367.03		4.4651	362.47		2.3812	563.09		5-formyltetrahydrofolate cyclo-ligase family protein		Central intermediary metabolism	Other
DVU0673	1.5017	65.75		1.8259	121.3		2.0616	293.88		3.7561	306.63		3.3627	368.81		2.6773	475.94		hypothetical protein		Hypothetical proteins
DVU2492	2.6486	170.93		2.3321	172.85		1.9115	161.92		3.755	1140.3		3.6862	1156.2		2.4718	553.8		N-(5-phosphoribosyl)anthranilate isomerase (trpF-2)	5.3.1.24	Amino acid biosynthesis	Aromatic amino acid family
DVU2614	2.4855	263.55		2.072	238.95		1.7348	140.9		3.7548	422.85	1	4.3874	332.62	3.5	2.8063	304.84	1	hypothetical protein		Hypothetical proteins
DVU2387	7.1891	193.58		3.172	197.9		7.2849	254.38		3.7533	6561.7		6.6949	6111.9		1.6926	3149		ABC transporter, ATP-binding protein		Transport and binding proteins	Unknown substrate
DVU1261	1.4595	104.47		2.534	139.73		2.792	191.35		3.7532	947.52		4.7673	834.58		1.661	740.88		conserved domain protein		Hypothetical proteins	Domain
DVU0476	1.8908	87.95		2.0205	58.675		1.879	185.73		3.7529	304.01		4.0291	392.42		3.5488	291.54		hypothetical protein		Hypothetical proteins
DVU2707	3.3214	141.95		3.1823	155		2.9148	208.35		3.7527	1555.5		6.9989	1631.2		2.2881	1263.3		virion morphogenesis protein		Other categories	Prophage functions
DVU2962	2.3118	273.67		4.6289	352.8		4.2997	441.2		3.7514	1155.1		6.0968	855.59		2.6714	538.86		sensor histidine kinase		Regulatory functions	Protein interactions
DVU1499	1.8577	124.4		2.0461	167.18		1.9111	237.03		3.7497	417.51		4.0449	405.44		2.6029	472.21		hypothetical protein		Hypothetical proteins
DVU0512	1.997	144.08		2.1128	83.35		3.0949	224.82		3.7488	2896.8		5.246	2449.3		4.0151	1296		flagellar basal-body rod protein, putative		Cellular processes	Chemotaxis and motility
DVU2188	0.46045	62.325		2.8484	67.575		3.8245	141.9		3.748	1036.4		4.4696	1079.6		3	816.06		primase, putative		DNA metabolism	DNA replication, recombination, and repair
DVU0989	2.2564	206.1		2.3395	361.5		2.1299	292		3.7479	4228.8		4.0272	2490.4		2.6977	1508.5		periplasmic divalent cation tolerance protein cutA, putatives		Cellular processes	Detoxification
DVU0964	4.3903	402.82	3	3.9439	264.45	11.3333	4.64	378	4.33333	3.7457	1226.8	8.5	5.4036	1441.1	28.5	2.2512	483.94	6	Glu/Leu/Phe/Val dehydrogenase family protein		Energy metabolism	Amino acids and amines
DVU2086	0.38766	22.675		3.1091	43.45		4.3904	132.85		3.7426	5039.5		9.6216	5649.8		2.7401	3495.2		transcriptional regulator, GntR family		Regulatory functions	DNA interactions
DVU2348	2.3842	397.65		2.6399	425.78		3.0375	294.65		3.7413	5969.6	2.5	3.1446	3858.6	4	3.0567	2515.8	1	deoxyuridine 5-triphosphate nucleotidohydrolase (dut)s	3.6.1.23	Purines, pyrimidines, nucleosides, and nucleotides	2'-Deoxyribonucleotide metabolism
DVU1380	1.6848	70.425		1.878	134.75		2.0068	246.68		3.7399	6328.9		2.6449	3417.8		3.6279	3391.3		hypothetical protein		Hypothetical proteins
DVU0949	2.9683	280.93	1.66667	2.8444	326.28	1	3.0602	456.35	5.66667	3.7394	1077.4		5.0112	1370.7		2.1964	697.61		conserved domain protein		Hypothetical proteins	Domain
DVU2091	1.1671	45.025		2.0038	85.05		1.3166	70.775		3.7382	7283.6		6.6202	6828.6		3.5664	3380.5		thiamine-phosphate pyrophosphorylase (thiE-1)	2.5.1.3	Biosynthesis of cofactors, prosthetic groups, and carriers	Thiamine
DVU1451	2.581	187.23		2.6827	249.22		3.0324	139.57		3.738	3459.7		4.5706	2362.5		1.9859	1549.6		response regulator		Regulatory functions	Protein interactions
DVU1519	3.5551	341.92		2.6149	422.73		7.9769	952.6		3.7369	2427.8		5.6246	1104.4		2.9539	914.52		transcriptional regulator, putative		Other categories	Prophage functions
DVUA0013	1.5982	82.675		2.0386	74.275		1.1672	64.05		3.736	354.93		3.3043	321.48		3.0296	355.58		nitrogen regulatory protein P-II (glnB-2)		Central intermediary metabolism	Nitrogen metabolism
DVUA0046	2.9761	156.23		2.1825	219.17		1.3502	117.63		3.7333	286.34		3.4781	314.62		2.0768	271.67		glycosyl transferase, group 2 family protein		Cell envelope	Biosynthesis and degradation of surface polysaccharides and lipopolysaccharides
DVU1980	2.7252	563.65		3.2925	1053.1		2.6044	554.48		3.7318	6211.6		2.9569	3205.3		2.6456	1349.8		hypothetical protein		Hypothetical proteins
DVU2815	4.3847	196.8		3.7076	259.35		3.3905	165.75		3.7311	1209.7		5.1059	1001.2		2.2953	3041.4		outer membrane efflux protein		Transport and binding proteins	Unknown substrate
DVU3061	6.5763	478.27		8.9648	722.02		5.2393	365.05		3.7297	3039.9		9.4977	4347.7		3.5031	2331.9		sensory box histidine kinase		Signal transduction	Two-component systems
DVU2911	2.4196	236.05		2.4313	220.47		1.509	146.87		3.7296	1161.3	1	4.9427	1424.3	1	3.0109	880.6	1	hemolysin A		Cellular processes	Toxin production and resistance
DVU0311	2.3032	101.8		2.0132	130.9		1.3507	125.4		3.7282	2981		4.0561	2113.1		2.8667	1016.1		flagellar assembly protein FliH, putative		Cellular processes	Chemotaxis and motility
DVU2196	1.0111	33.225		2.4728	37.05		1.7384	171.88		3.728	468.94		4.7697	565.93		2.6922	549.74		hypothetical protein		Hypothetical proteins
DVU3008	3.5095	358.6		2.3491	361.4		2.0223	241.3		3.7267	2492	1	4.2119	2629.4	1.5	2.3979	1361.2	1	NeuB family protein		Cell envelope	Biosynthesis and degradation of surface polysaccharides and lipopolysaccharides
DVU1272	2.6461	183.32		3.8932	190.72		3.2996	71.85		3.7246	1216		6.1224	910.55		3.8727	965.95		general secretion pathway protein E, putative		Protein fate	Protein and peptide secretion and trafficking
DVU1506	1.8384	99.15		1.9882	100.97		1.0968	90.8		3.7236	291.78		3.8319	332.97		2.7157	857.56		hypothetical protein		Hypothetical proteins
DVU0489	2.6185	242.6		2.7561	244.57		2.4207	164.2		3.7223	1483.9	3.5	6.1114	1218.2	3.5	2.7313	866.68	3	phenylacetate-coenzyme A ligase (paaK-1)	6.2.1.30	Energy metabolism	Other
DVU3057	0.77792	19.625		1.9207	35.9		1.3541	46.625		3.7189	776.02		3.3835	816.14		1.9658	567.77		oxygen-independent coproporphyrinogen III oxidase, putatives		Biosynthesis of cofactors, prosthetic groups, and carriers	Heme, porphyrin, and cobalamin
DVU1964	3.0694	571.53		2.4889	360.48		4.2967	507.57		3.7165	7480.6		9.321	14029		8.3077	15679		transcriptional regulator, rrf2 protein, putative		Regulatory functions	DNA interactions
DVU2350	3.1267	175.5		3.0897	186.3		2.7441	289.55		3.7153	1222.9		6.3092	1033.7		2.5405	739.05		gid protein (gid)		Unknown function	General
DVU1959	0.16148	45.975		2.9155	105.17		7.2221	125.98		3.713	700.57		5.3339	847.27		2.6601	511.23		EAL domain/GGDEF domain protein		Unknown function	General
DVU1578	1.4321	84.975		3.054	81.075		3.0845	148.45		3.7118	2226.9		8.0105	1780.3		4.0295	927.29		TPR domain protein		Unknown function	General
DVU1176	2.1581	228.15		2.183	205.6	1.33333	2.1051	206.43		3.7093	4040.9	5	4.1565	3617.6	4	3.3619	2830.5	5.5	hypothetical protein		Hypothetical proteins
DVUA0138	0.95874	78		2.3546	150.1		4.7301	197.3		3.7067	1037.8		6.4811	892.69		3.3383	690.81		sensor histidine kinase		Regulatory functions	Protein interactions
DVU1723	1.7699	60.725		2.4072	40.275		1.1967	128.22		3.7061	230.71		2.7873	247.32		3.0662	230.9		hypothetical protein		Hypothetical proteins
DVU3304	2.5814	320.38		3.125	293.07		2.2093	173.78		3.7054	563.53		4.4542	531.83		2.5987	319.02		sensor histidine kinase, degenerate		Disrupted reading frame
DVU1241	2.3019	536.45		2.4328	535.13		2.1832	335.98		3.7041	4546.9	1	3.9914	4574.6	1	3.3841	1856.3	2	conserved hypothetical protein		Hypothetical proteins	Conserved
DVU1359	2.4879	204.47		2.4798	213.63		3.1937	253.8		3.7034	3213.3		7.3207	3394.8		2.2109	1073.4		hypothetical protein		Hypothetical proteins
DVU2635	2.1771	145.95		2.2317	217.9		1.3436	125.75		3.7011	1768.7		5.1813	1876.3		2.9786	1980.7		glycosyl transferase, group 1 family protein		Cell envelope	Biosynthesis and degradation of surface polysaccharides and lipopolysaccharides
DVU1801	3.4648	308.72		2.6862	239.52		2.2603	215.23		3.7005	3181.8		14.065	6510.8		5.8568	8283.1		hypothetical protein		Hypothetical proteins
DVU1419	2.7607	210.37		4.9075	506.75		3.4528	318.7		3.6984	980.69	1	6.4691	930.45	3	3.3282	617.81	1.5	sigma-54 dependent transcriptional regulator/response regulators		Regulatory functions	DNA interactions
DVU1027	2.3704	202.55		2.947	67.65		2.877	112.53		3.6983	1500	1	6.4695	2606.3	1	3.6793	1591.1	2	hypothetical protein		Hypothetical proteins
DVU2434	1.9081	115.63		2.1361	133.52		1.6182	91.725		3.6974	2549.4	1	5.0357	2064.1	1	5.6711	4577.4	1	hypothetical protein		Hypothetical proteins
DVU0452	4.5636	122.02		2.047	68		2.9982	84.675		3.6969	917.05		5.0918	661.89		2.1242	1126.7		hypothetical protein		Hypothetical proteins
DVU1062	3.4947	490.85		2.6388	369.5		3.7278	327.45		3.6916	2878.4		5.2623	4083.9		2.6431	2488.3		conserved hypothetical protein		Hypothetical proteins	Conserved
DVU1674	1.9658	155.6		2.1935	215.37		2.3693	340.73		3.6903	3976.5		6.1601	3253.1		6.1453	6047.6		transcriptional regulator, putative		Regulatory functions	DNA interactions
DVU3118	2.5546	480.88		2.9866	674.55		2.6915	474.6		3.6902	2700.6		4.2544	1748.4		2.712	790.89		conserved hypothetical protein		Hypothetical proteins	Conserved
DVU1804	3.4656	149.85		2.2241	169.38		11.083	171		3.6862	973.86		2.55	868.01		2.579	459.13		glycosyl transferase, group 1 family protein		Cell envelope	Biosynthesis and degradation of surface polysaccharides and lipopolysaccharides
DVU0517	7.3967	103.12		3.2768	88.925		5.2157	146.37		3.6852	2301.9		6.0323	1654.7		4.4477	1121.2		peptidase, M23/M37 family		Protein fate	Degradation of proteins, peptides, and glycopeptides
DVU1919	1.9871	197.65		2.5183	431.5		2.7249	405.23		3.6849	3882.3		4.6603	3800.6		3.4077	3047.4		hydrogenase expression/formation protein, putative		Protein fate	Protein modification and repair
DVU1003	1.1907	26.4		2.6068	70.7		2.2223	220.05		3.684	3777.9		5.3762	2887		2.0796	2238.5		dnaJ domain protein		Protein fate	Protein folding and stabilization
DVU1093	2.9052	722.88		3.1151	531.65		2.4313	399.85	1.33333	3.6808	4217.8		6.8833	5700.3		2.6492	1800		HAD-superfamily hydrolase, subfamily IA, variant 3		Unknown function	Enzymes of unknown specificity
DVUA0024	3.6307	322.12		3.0332	266.85		3.6241	214.95		3.6787	555.34		4.7976	863.36		2.4589	543.7		sigma-54 interaction domain protein		Regulatory functions	DNA interactions
DVU1695	2.6488	234.73		2.328	254.9		2.153	197.52		3.6749	672.06		4.0396	649.94		2.1375	1182.7		tail fiber assembly protein, putative		Other categories	Prophage functions
DVU1955	4.6274	422.35		4.1173	460.57		3.6225	418.15		3.673	1235.9		5.2894	1080.5		3.1229	713.66		TPR domain protein		Unknown function	General
DVU3312	1.6797	109.75		2.0636	169.22		1.7062	175.08		3.6704	1257.2		4.8599	1265.6		3.5091	1335.3		conserved hypothetical protein		Hypothetical proteins	Conserved
DVU0363	1.6799	51.4		1.9591	51.775		2.2162	157.4		3.6695	656.54		3.8174	484.78		2.2056	440.77		para-aminobenzoate synthase, component I (pabB)		Biosynthesis of cofactors, prosthetic groups, and carriers	Folic acid
DVU1646	1.7974	99.4		1.9904	134.1		2.8942	552.03		3.6688	2426.3		4.3148	2048.9		2.8212	1546.1		arsenate reductase (arsC)	1.20.4.1	Cellular processes	Detoxification
DVU2524	1.7747	114.95		2.0795	135.07		1.6052	170.7		3.6673	455.98		4.8451	422.24		3.3755	547.62		cytochrome c3, putative		Energy metabolism	Electron transport
DVU1624	3.0091	332.92		2.2449	246.15		3.3232	388.45		3.667	1241.5		4.6011	1597.7		2.9819	752.7		2-dehydro-3-deoxyphosphooctonate aldolase (kdsA)	4.1.2.16	Cell envelope	Biosynthesis and degradation of surface polysaccharides and lipopolysaccharides
DVU1429	2.552	152.3		3.4458	208.78		2.9134	157.68		3.6668	1843.3	4	6.3149	1483.9	5	3.8524	956.68	2	GTP-binding protein		Unknown function	General
DVU2799	2.3749	460.38		2.5346	395.9		1.9639	242.1		3.6599	5084.2		4.9848	5496.3		2.8004	2570.4		transcriptional regulator, MarR family		Regulatory functions	DNA interactions
DVU2410	4.9318	1186.5	6.33333	3.338	602.6	6.33333	4.853	2382.6	7	3.6594	1181.2		5.6089	955.23		2.7242	438.24		superoxide dismutase, Fe (sodB)	1.15.1.1	Cellular processes	Detoxification
DVU1797	2.6782	217.2		2.4246	237.85		2.2582	266.37		3.659	2238.7		6.1054	1972.1		3.0601	1235.5		dimethyladenosine transferase (ksgA)	2.1.1.-	Cellular processes	Toxin production and resistance
DVUA0121	4.2122	177.68		2.1942	186.65		3.4103	114.92		3.6582	2427.9		3.9138	2376.7		2.0197	840.77		type III secretion system protein, YopQ family		Cellular processes	Pathogenesis
DVU0492	4.3686	698.8	1.33333	3.3993	508.88		2.9889	313.23		3.6575	3422.9	2.5	5.6868	2550.4	2.5	2.4366	1062.5	1	N-acetyl-gamma-glutamyl-phosphate reductase (argC)	1.2.1.38	Amino acid biosynthesis	Glutamate family
DVU0735	2.1925	207.15		2.4502	164.32		1.727	151.68		3.657	782.16		4.2169	674.38		2.8797	620.6		MOSC domain protein		Unknown function	General
DVUA0054	4.1955	226.78		2.1426	214.05		2.3057	205.72		3.6544	484.63		3.2583	457.28		2.2624	270.3		glycosyl transferase, group 1 family protein		Cell envelope	Biosynthesis and degradation of surface polysaccharides and lipopolysaccharides
DVU2984	3.409	334.45		2.3945	343.9		1.8137	116.93		3.6539	2719	2.5	5.044	2014.7	4.5	2.7603	2753.3	1	conserved hypothetical protein		Hypothetical proteins	Conserved
DVU2226	3.7537	1113.2		3.3698	376.92		3.46	691.95		3.651	4062.4	35.5	5.7557	2659.4	35.5	3.0201	1944	22	acetyl-CoA carboxylase, biotin carboxylase, putative		Fatty acid and phospholipid metabolism	Biosynthesis
DVUA0072	3.8168	431.1		2.6029	324.98		2.4239	357.8		3.6498	1536.6		4.5236	704.9		2.3734	330.83		glycosyl transferase, group 1 family protein		Cell envelope	Biosynthesis and degradation of surface polysaccharides and lipopolysaccharides
DVU3254	5.916	256.78		3.049	236.03		7.8315	143.18		3.6491	1433.4		3.4582	1737.8		2.8444	750.41		PDZ domain protein		Unknown function	General
DVU2303	5.7087	178.68		3.117	272.2		4.0994	237.55		3.6482	1176		5.428	855.68		1.8456	519.98		conserved domain protein		Hypothetical proteins	Domain
DVU0680	1.7924	87.3		2.4885	146.55		4.4513	142.7		3.6434	999.34		4.8828	920.37		2.9646	575.83		sensory box histidine kinase	2.7.3.-	Regulatory functions	Protein interactions
DVU0055	2.7556	183.25		2.1715	197.28		1.5774	205.2		3.6381	2338.2		4.9383	1863.9		2.5793	1293.2		hydroxymethylbutenyl pyrophosphate reductase (ispH)		Biosynthesis of cofactors, prosthetic groups, and carriers	Other
DVU1721	2.9722	182.32		3.86	303.23		3.7528	174.37		3.6373	560.7		4.0754	558.58		2.5251	659.36		hypothetical protein		Hypothetical proteins
DVU1944	2.5892	500.02		2.1265	517.57		2.3063	509.1		3.6359	3202.8		4.1795	2535.7		3.4327	1718.1		pyruvate ferredoxin oxidoreductase, iron-sulfur binding subunit,sputative		Energy metabolism	Anaerobic
DVU0049	2.4317	122.65		2.0499	134.5		2.6904	158.75		3.6325	1435.3		4.2599	1018.2		1.9176	824.81		OmpA family protein		Cell envelope	Other
DVU0193	1.9016	114.25		2.7763	90.9		1.2693	119.75		3.6301	926.44		5.79	983.21		2.8802	678.28		hypothetical protein		Hypothetical proteins
DVU1120	4.9452	120.55		2.9981	118.87		2.2378	182.92		3.6289	518.33		5.3418	488.49		2.1171	519.7		conserved hypothetical protein		Hypothetical proteins	Conserved
DVU2145	2.0561	106.88		2.2284	88.05		4.6184	272.8		3.6288	1846.9		6.2816	2397.8		3.3301	2159.5		chloramphenicol acetyltransferase, putative		Cellular processes	Toxin production and resistance
DVU2699	1.4425	32.575		2.1372	102.67		2.5718	115.45		3.6287	961.69		3.4837	707.88		2.2864	562.19		transglycosylase SLT domain protein		Unknown function	General
DVU0470	1.1657	60.825		2.0774	41.575		2.0445	83.825		3.6287	4329.3	14.5	4.8829	2035.3	26	4.2339	3070.4	18.5	tryptophan synthase, beta subunit (trpB-2)	4.2.1.20	Amino acid biosynthesis	Aromatic amino acid family
DVU2337	3.2384	144.5		3.2068	176.45		1.8403	115.83		3.6275	1636.3		5.8442	1531.7		3.2421	1054		peptidase, M23/M37 family		Protein fate	Degradation of proteins, peptides, and glycopeptides
DVU0115	2.0761	128.62		2.0903	175.55		1.6639	160.48		3.6241	632.07		3.4182	437.56		2.9675	562.49		shikimate 5-dehydrogenase (aroE)	1.1.1.25	Amino acid biosynthesis	Aromatic amino acid family
DVU1495	1.7261	117.45		1.8704	164.97		1.8775	252.58		3.6204	296.86		3.6247	304.79		2.8732	356.22		hypothetical protein		Hypothetical proteins
DVU2382	5.4384	323.3		3.4938	451.85		3.1464	292.08		3.6172	734.55		5.4211	550.14		2.0593	609.9		conserved domain protein		Hypothetical proteins	Domain
DVUA0112	3.4011	127.55		3.5254	109.85		2.9955	50.725		3.6156	2617.9	1	7.1485	1765	1	1.4857	865.57	1	type III secretion system protein, YscC family		Protein fate	Protein and peptide secretion and trafficking
DVU1386	2.3573	143.3		2.3745	151.85		3.5374	225.5		3.6151	1410.3		6.1313	1137.7		2.9076	660.17		membrane protein, putative		Cell envelope	Other
DVU3236	3.8557	181.32		4.4781	188.72		5.1317	220.65		3.6131	884.28		7.9955	1002.5		2.6107	545.95		GTP-binding protein HflX (hflX)		Unknown function	General
DVUA0106	3.0188	172.63		2.2939	208.22		1.7995	221.23		3.6094	2663.2		4.8049	3235.6		4.2087	2798.4		type III secretion target, YopN family		Cellular processes	Pathogenesis
DVU0805	2.3104	357.45		2.0779	312.47		1.8617	316.35		3.6077	4668.8		3.4722	2932.1		2.5414	1267		hypothetical protein		Hypothetical proteins
DVU1487	1.8028	120.38		1.8939	158.27		1.4748	131.47		3.6075	354.25		3.7897	318.32		3.3028	264.77		conserved domain protein		Hypothetical proteins	Domain
DVU1595	1.909	143.03		2.1278	147.4		2.3089	299.92		3.6036	1465.3		5.0672	1123.8		2.6441	831.24		chemotaxis protein methyltransferase (cheR-1)	2.1.1.80	Cellular processes	Chemotaxis and motility
DVU1881	4.3768	609.3		6.1682	804.95		3.9941	572.48		3.6014	1513.8		6.4768	1647.4		2.146	598.61		phoH family protein		Unknown function	General
DVU0246	7.8606	259.72		3.5118	211.72		5.1021	262.5		3.5982	8596.1	1	6.7733	5547.8	1	3.7851	4545.8	1	pyruvate phosphate dikinase, PEP/pyruvate binding domain proteins		Unknown function	General
DVU1702	1.2322	54.75		2.3934	161.53		1.7419	282.62		3.5969	557.67		5.0963	557.67		3.2626	337.95		conserved hypothetical protein		Hypothetical proteins	Conserved
DVU0629	2.7353	553.22		2.88	443.67		3.3046	592.35		3.5966	3566.5	1	5.3159	3082.8	2.5	2.6449	1555.3	1.5	transcriptional regulator, TetR family		Regulatory functions	DNA interactions
DVU2933	2.8675	231.38		2.6872	80.95		3.0023	170.18		3.5945	3183.4		7.4044	2661.1		2.1698	1334.5		response regulator/sensory box/HDIG domain protein		Regulatory functions	Protein interactions
DVU1683	2.3412	217.38		3.0497	226.08		4.0145	302.4		3.5942	1380.2		6.2242	1455.4		2.6533	1019		hypothetical protein		Hypothetical proteins
DVU1055	2.5074	239.93		2.1617	205.85		2.9138	269.5		3.5902	1178.7		4.0077	1392.3		3.199	1251.4		heptosyltransferase family protein		Cell envelope	Biosynthesis and degradation of surface polysaccharides and lipopolysaccharides
DVU1017	0.30691	71.675		3.502	17.425		6.3586	99.625		3.5871	2668	3	8.5158	2264.9	8.5	6.9592	1684.2	2	ABC transporter, ATP-binding protein/permease protein		Transport and binding proteins	Unknown substrate
DVU0481	3.1892	268.2	1.33333				2.6847	207.23	1.33333	3.5851	2486.3	7	7.0141	1998.8	9	5.6047	1644	7.5	ADP-L-glycero-D-mannoheptose-6-epimerase (rfaD)	5.1.3.20	Cell envelope	Biosynthesis and degradation of surface polysaccharides and lipopolysaccharides
DVU0331	8.4783	539.42		3.8043	240.82		5.4348	624.65		3.5748	798.83		5.3119	983.86		1.4355	547.35		sensory box histidine kinase, putative		Regulatory functions	Protein interactions
DVU3366	2.0996	249.27		2.1426	224.3		1.7977	211.45		3.5721	2680.4	1	5.0025	3000.1	1	3.4506	2730.7	1	polypeptide deformylase (def)	3.5.1.31	Protein fate	Protein modification and repair
DVU2574	3.7239	3795		5.4258	1498.2		6.3865	5012.3		3.5715	5018.2		4.622	5005.5		8.8537	8857		ferrous ion transport protein, putative		Transport and binding proteins	Cations
DVU0316	2.8297	336		2.7463	458.2		2.3702	419.72		3.5714	1588.5		5.001	1513.3		2.9544	634.97		flagellar basal-body rod protein FlgB (flgB)		Cellular processes	Chemotaxis and motility
DVU2194	2.5777	392.88		2.2345	359.48		2.1522	350.75		3.571	454.25		4.6205	372.63		2.4303	409.22		hypothetical protein		Hypothetical proteins
DVU0589	2.6915	273.98		2.2168	189.9		1.9064	226.75		3.5709	2577.5		5.1487	2063.1		3.0008	1160.8		molybdopterin-guanine dinucleotide biosynthesis protein B, putatives		Biosynthesis of cofactors, prosthetic groups, and carriers	Molybdopterin
DVU1566	0.78341	18.05		1.9463	41.2		1.41	83.925		3.5683	1662.8		4.9952	1113.8		2.3343	1175.3		phosphoadenosine phosphosulfate reductase, putative		Amino acid biosynthesis	Serine family
DVU2411	8.9539	3060.6		13.186	2331.8		10.332	2474.2	1.66667	3.566	2359.3	5.5	4.5757	1435	1.5	2.7889	870.87	1	EF hand domain protein		Unknown function	General
DVU0904	2.5085	167.8		2.3758	122.2		2.6584	218.7		3.565	1074.3		3.974	1154.1		2.198	539.54		single-stranded-DNA-specific exonuclease RecJ (recJ)	3.1.-.-	DNA metabolism	DNA replication, recombination, and repair
DVU2893	2.361	236.67		2.3658	546.45		1.8887	291.7		3.5633	6721.8		4.5932	9413.3		6.7762	9241.6		flagellar basal-body rod protein, putative		Cellular processes	Chemotaxis and motility
DVU1720	1.7732	94.75		2.0773	117.23		1.3029	190.68		3.5631	266.2		3.8194	244.56		3.4542	259.29		hypothetical protein		Hypothetical proteins
DVU0134	2.7619	256.8		2.1636	302.95		1.2868	172.15		3.5623	493.8		3.8353	559.27		2.3787	398.2		glycosyl transferase, group 2 family protein		Cell envelope	Biosynthesis and degradation of surface polysaccharides and lipopolysaccharides
DVU2124	2.3369	200.25		2.3502	144.05		2.2239	235.05		3.5612	550.03		4.6143	486.27		2.4901	349.61		conserved hypothetical protein		Hypothetical proteins	Conserved
DVU1925	2.5973	404.67		2.6598	584.98		3.0517	371.68		3.5599	3894		3.6373	3283.3		2.9424	2068.1		lipase, GDSL family		Fatty acid and phospholipid metabolism	Degradation
DVU1472				7.7565	241.07	4.66667	7.7214	383.65	2.66667	3.5586	2330.7		6.8711	1890.9		6.6538	1816		ATP-dependent protease, putative		Protein fate	Degradation of proteins, peptides, and glycopeptides
DVU1116	2.3333	153.7		3.0225	157.78		1.7952	77.65		3.558	617.34		5.0354	533.9		2.125	442		hypothetical protein		Hypothetical proteins
DVU1213	0.44521	22.175		2.6222	31.475		3.5359	132.6		3.5573	1324.1		3.6764	1362.1		2.5841	1289.6		rhomboid family protein		Unknown function	General
DVU0372	1.9439	109.52		2.1082	134.18		2.1786	164.47		3.5566	516		3.0065	630.38		3.2173	450.54		membrane protein, putative		Cell envelope	Other
DVU2331	8.1262	334.15		5.2743	387.93		4.9769	289		3.5561	1324.8	1.5	5.6298	1137.5	2.5	2.113	977.99	1	Smr family protein		Unknown function	General
DVUA0092	2.5874	327.3		2.4626	305.7		2.1809	379.8		3.5561	470.4		4.3431	546.75		4.1445	238.53		hypothetical protein		Hypothetical proteins
DVUA0066	2.4926	162.43		2.9314	178.9		4.1217	128.4		3.5555	456.31		3.9477	523.85		4.38	367.79		phospholipase, patatin family		Fatty acid and phospholipid metabolism	Degradation
DVU2085	0.83299	257.75					9.2397	267.4		3.5525	1076.4	4	6.4135	1164.3	7	5.2482	483.51	2	Snf2 family protein		Unknown function	General
DVU2691	2.0595	126.67		2.6821	158.75		1.9407	213.57		3.5482	975.71		4.8638	694.23		2.7771	587.44		hypothetical protein		Hypothetical proteins
DVU2281	4.0767	291.05		3.4236	89.675		5.4311	298.73		3.5455	692.56		3.7768	798.56		2.198	503.27		sensor histidine kinase/response regulator	2.7.3.-	Regulatory functions	Protein interactions
DVU0156	4.3172	329.4		3.1237	223.35		2.3505	236.23		3.545	4676.6	2	6.6378	3387	3.5	3.1005	2396.1	1	ATP-dependent DNA helicase, UvrD/REP family		DNA metabolism	DNA replication, recombination, and repair
DVU0573	2.6611	635.25		3.0443	446.32		2.3752	587.92		3.5428	3533		4.8589	2692.7		2.8853	1114		creA protein (creA)		Unknown function	General
DVU1008	2.1025	134.45		2.2967	153.9		1.9533	102.45		3.5377	4923		4.8606	3070.2		2.7622	3304.4		hypothetical protein		Hypothetical proteins
DVU2466	1.3866	53.05		2.4513	70.875		1.8223	65.75		3.5375	883.17		4.4291	1361.5		1.4926	793.85		flocculin repeat domain		Unknown function	General
DVU0378	2.0659	203.47		2.0567	206.3		1.659	277.23		3.535	2254.4		4.4521	2541.8		3.3607	1497.5		thioredoxin, putative		Energy metabolism	Electron transport
DVU0861	2.1367	114.83		2.1026	187.23		2.0563	200.55		3.5337	1171.2		4.4133	1455.7		2.319	635.98		glycosyl transferase, group 1 family protein		Cell envelope	Biosynthesis and degradation of surface polysaccharides and lipopolysaccharides
DVU3231	2.4633	132.85		2.1647	111.8		2.2731	261.75		3.5308	1704.7		4.885	1727.1		3.1438	513.69		flagellar biosynthesis protein FlhF, putative		Cellular processes	Chemotaxis and motility
DVU1532	1.7196	99.9		2.0822	101.85		1.8316	150.65		3.5302	3548.5		5.378	2884.7		3.1054	1626		pantetheine-phosphate adenylyltransferase (coaD)	2.7.7.3	Biosynthesis of cofactors, prosthetic groups, and carriers	Pantothenate and coenzyme A
DVU1998	2.0688	267.25		1.8756	361.2		3.0864	1238.2		3.5287	288.6		3.7144	289.6		3.1313	431.92		hypothetical protein		Hypothetical proteins
DVU1810	2.008	204.47		2.1784	172.08		2.0799	323.5		3.5271	8873		3.6892	5617.9		4.3303	5098		hypothetical protein		Hypothetical proteins
DVU2263	1.7157	96.125		2.3939	153.22		5.4926	171.8		3.5271	1726.4		5.7393	1523.7		3.9998	1304.3		outer membrane autotransporter barrel domain protein		Cellular processes	Pathogenesis
DVU3178	2.7531	494.2		2.2353	359.85		2.1217	308.55		3.5266	6276		3.9474	5786.7		3.9561	4734.1		conserved hypothetical protein		Hypothetical proteins	Conserved
DVU1140	2.1382	149.15		3.3149	125.95		2.4911	81.3		3.5265	407.32		4.4855	410.12		1.5533	438.58		bacteriophage transposase A protein, putative		Other categories	Prophage functions
DVU1019	3.5787	261.7		2.6726	156.28		3.221	223.78		3.5253	3232.3	1	5.4049	2585	1	2.7419	1368.9	2	conserved domain protein		Hypothetical proteins	Domain
DVU0021	3.5123	443.65		2.5723	346.2		3.9448	280.68		3.5253	2187.4		4.7533	2316		2.4744	1079.8		conserved domain protein		Hypothetical proteins	Domain
DVU2164	1.2945	25.35		1.9606	22.275		1.0932	57.425		3.5227	277.88		3.409	356.9		2.5688	320.05		lipoprotein, putative		Cell envelope	Other
DVU2271	1.7245	100.93		2.055	153.27		2.3693	178.6		3.5205	1026.2		5.0228	819.69		3.1208	873.05		pyruvate formate-lyase activating enzyme, putative		Energy metabolism	Fermentation
DVU1717	0.81326	10.675		2.4868	42.875		1.0071	36.95		3.5205	426.66		3.9598	458.7		2.7513	384.91		hypothetical protein		Hypothetical proteins
DVU1082	2.0473	103.47		2.6318	184.43		3.0776	215.6		3.5192	3831.1		4.8459	3513.5		4.2686	3620.8		3- 5 exonuclease domain protein		Unknown function	General
DVU1483	2.207	129.52		2.2788	147.73		2.4472	178.13		3.5175	983.05		3.9146	830.26		2.1265	637.8		tail fiber assembly protein, putative		Other categories	Prophage functions
DVU0792	2.3888	619.72		2.0443	301.9		2.3733	497.83		3.5145	6243.8		3.3061	4779.7		3.2824	3839.1		conserved domain protein		Hypothetical proteins	Domain
DVU2308	4.0244	809.5		2.3986	665.73		3.1439	626.25	1	3.5127	6992.3		6.5236	6115.6		3.7373	2882.2		conserved hypothetical protein TIGR00022		Hypothetical proteins	Conserved
DVU0526	2.7914	226.55		3.1708	318.15		7.0735	254.8		3.5108	822.91		2.4912	783.99		2.0272	1614.9		drug resistance transporter, putative		Transport and binding proteins	Other
DVU2583	2.6369	584.18		2.5627	571.73		2.9115	926.83		3.5065	4450		4.3364	5401.2		3.2308	2130.5		lipoprotein, putative		Cell envelope	Other
DVU0388	2.1921	170.93		2.5478	131.65		2.4018	136.82		3.5065	4781.9	3	5.267	3627.7	3.5	3.0374	2987.8	2.5	amino acid ABC transporter, ATP-binding protein		Transport and binding proteins	Amino acids, peptides and amines
DVU0971	2.3462	260.1		2.3356	265.7		1.7055	229.75		3.5056	1853.3	1	4.2875	1550.2	1	2.1224	766.47	1	molybdenum cofactor biosynthesis protein		Biosynthesis of cofactors, prosthetic groups, and carriers	Molybdopterin
DVU1404	2.3725	134.75		2.2122	183.52		3.0632	180.52		3.5021	1135.5		6.1396	1075.4		2.8603	680.13		radical SAM domain protein		Unknown function	Enzymes of unknown specificity
DVU0335	4.1842	291.22		2.322	242.47		3.7913	212.73		3.5001	1415.9	1.5	3.5602	1125.6	4.5	2.3323	609.63	4.5	3-deoxy-D-manno-octulosonic-acid transferase, putative		Cell envelope	Biosynthesis and degradation of surface polysaccharides and lipopolysaccharides
DVU2010	2.4798	267.5		2.3207	325.75		3.5977	652.4		3.4988	2418.5		5.6865	1967.7		3.2647	1625.4		ISD1, transposase OrfB		Other categories	Transposon functions
DVU3119	1.3855	118.95		4.0067	157.1		2.8083	158.97		3.4972	2015.1		7.5791	1115.8		2.8065	964.67		AMP-binding enzyme family protein		Unknown function	Enzymes of unknown specificity
DVU0542	2.0485	176.75		1.98	108.47		2.6274	268.8		3.495	956.08		4.5493	898.88		3.1252	912.85		universal stress protein family		Cellular processes	Adaptations to atypical conditions
DVU2189	1.9617	166.45		2.1991	125.35		1.3179	163.3		3.4946	480.65		4.3034	466.94		2.8012	341.92		transcriptional regulator cII, putative		Other categories	Prophage functions
DVU2266	1.3338	37.9		2.0127	70.575		1.3606	120.85		3.4946	344.6		3.6935	364.32		3.0462	363.7		hypothetical protein		Hypothetical proteins
DVU2224	3.2823	467.85		2.5472	277.25		2.4632	289.88		3.4926	948.71	5	4.7942	652.44	1.5	2.8856	483.94	1	hypothetical protein		Hypothetical proteins
DVU1924	3.3206	816.3		2.2674	525.58		2.1825	344.35		3.4924	3634		4.3828	3659.1		2.6262	2079.7		hydrogenase assembly chaperone hypC/hupF (hypC)		Protein fate	Protein folding and stabilization
DVU2197	1.9456	109.15		2.2794	172.98		2.5377	155.82		3.492	828.33		5.1325	770.35		2.8268	1662.8		site-specific recombinase, phage integrase family		DNA metabolism	DNA replication, recombination, and repair
DVU2058	4.184	684.35	1.66667	3.9398	439.4		3.9034	431.45	2.33333	3.4917	1507		5.9799	1313.4		2.4268	944.83		HDIG domain protein		Unknown function	General
DVU3293	9.4434	944.7	2.33333							3.4909	8103.7	4	10.02	7496.2	19.5	2.6719	2720.5	1	thiamine pyrophosphate-requiring enzyme		Unknown function	Enzymes of unknown specificity
DVU0687	2.4803	161.25		2.7209	108.6		3.6291	276.5		3.4905	1134.7	1.5	5.5444	827.64	2.5	3.0492	679.89	3	aldehyde:ferredoxin oxidoreductase, tungsten-containing, putatives		Central intermediary metabolism	Other
DVU3131	2.2339	132.85		2.6067	249.7		3.9777	274.53		3.4889	1580.5		5.7623	1505.7		2.5701	1027.9		transcriptional regulator, putative		Regulatory functions	DNA interactions
DVU2890	2.3449	171.68		2.2508	130.9		1.8884	168.45		3.4886	7896.6		4.3341	7491.3		1.8986	3315		conserved domain protein		Hypothetical proteins	Domain
DVU2553	2.4093	390.6		2.7113	348.77		1.7846	162.32		3.4871	4275.1	2	3.9607	2762	1	2.9835	2495.9	2	NifU family protein		Unknown function	General
DVU3390	2.2627	149.38		1.8347	198.27		2.1791	158.35		3.4863	1098.9		5.4167	1611.1		2.6631	1444.8		hypothetical protein		Hypothetical proteins
DVU0513	2.5476	255.48		2.1755	180.43		2.2494	281.6		3.4855	2668.9		4.2683	1994.5		3.1268	914.19		flagellar basal-body rod protein FlgG (flgG)		Cellular processes	Chemotaxis and motility
DVU0058	4.2091	396.93		3.3363	267.3		1.7307	296.22		3.4843	2047.9		5.9401	1392.8		1.3934	2001.2		efflux transporter, RND family, MFP subunit		Transport and binding proteins	Unknown substrate
DVU0793	2.3113	535.6		1.9522	463.2		1.6675	253.88		3.4796	7815		4.7221	9752		7.1158	10578		hypothetical protein		Hypothetical proteins
DVU0463	2.969	280.87		2.4094	301.97		2.4561	168.38		3.4769	4280.1	16	4.3614	2218.6	26.5	5.647	6634.2	7.5	3-phosphoshikimate 1-carboxyvinyltransferase (aroA)	2.5.1.19	Amino acid biosynthesis	Aromatic amino acid family
DVU0022	1.7131	109		3.5265	163.7		5.0672	150.68		3.4768	803.14		5.3355	613.62		3.5039	339.52		HAMP domain/GGDEF domain/EAL domain protein		Unknown function	General
DVU0929	2.0184	176.6		3.4104	210.22		4.1857	159.27		3.4734	1686.2		6.8046	1479.8		4.9989	2023.8		GTP-binding protein, GTP1/OBG family		Unknown function	General
DVU0498	2.7563	246.15		2.0067	242.05		3.0604	218.65		3.4728	1747.9		4.2723	1185.7		1.4432	564.95		iron-sulfur cluster-binding protein, putative		Energy metabolism	Electron transport
DVU3216	3.369	253.88		4.3205	240.55		4.2995	218.78		3.4704	3545.1		7.1667	2854		3.0531	1443.9		sensor histidine kinase		Regulatory functions	Protein interactions
DVU2798	2.8169	95.975		2.3895	93.275		2.6009	77.75		3.4699	7956.3		4.9016	5863.6		2.0387	1184.6		ApbE family protein		Unknown function	General
DVU1793	3.0883	2333.3		2.5453	896.95		3.1786	1139.4		3.4675	12225		2.4803	6673.2		3.6244	5865.2		hypothetical protein		Hypothetical proteins
DVU1291	2.6659	267.93		2.0691	342.75		3.3536	481		3.4658	4396.2		4.2246	3249.1		2.935	3352.7		hypothetical protein		Hypothetical proteins
DVU1616	2.2753	375.42		1.8426	415.68		2.1643	485.4		3.4624	10314		2.964	6018.7		2.6891	2571.3		hypothetical protein		Hypothetical proteins
DVU1358	3.3807	461.53		4.051	571.07		4.9583	444.75		3.4607	1417.4		4.1208	1551		2.7353	802.66		hydrolase, haloacid dehalogenase-like family		Unknown function	Enzymes of unknown specificity
DVU2173	1.8361	194.47		1.8311	224.65		2.2361	715.6		3.4576	247.55		2.9891	416.9		3.0472	410.65		hypothetical protein		Hypothetical proteins
DVU1935	1.2511	108.13		2.4589	119.72		3.9521	159.1		3.4574	3249	6.5	5.3266	1587.2	14	6.1419	414.61	8	phosphonate ABC transporter, permease protein		Transport and binding proteins	Other
DVU0249	2.9161	266.35		2.7212	358.2		2.435	299.42		3.4557	1694		5.1521	1690.8		2.4833	1397		conserved hypothetical protein		Hypothetical proteins	Conserved
DVU1528	2.5536	367.37		2.9235	416.45		2.4954	402.58		3.4546	6561.3		5.2218	6454.7		3.5231	4148.9		cytidine/deoxycytidylate deaminase family protein		Unknown function	Enzymes of unknown specificity
DVU0429	2.241	239.03		2.0747	201.57		2.0513	405.3		3.4546	981.01		5.0061	980.04		2.3051	531.44		Ech hydrogenase, subunit EchF, putative		Energy metabolism	Electron transport
DVU2490	3.6964	498.28		2.8152	355.35		3.733	541.35		3.4531	2460.4		5.4036	2264.9		4.0554	1484.8		histidinol phosphatase, putative		Amino acid biosynthesis	Histidine family
DVU2436	2.4626	255.12		2.1102	165.4		1.4371	125.03		3.4509	2686.9		4.2487	2747.5		3.4029	2641.5		conserved hypothetical protein		Hypothetical proteins	Conserved
DVU1631	2.5173	221.6		2.1971	291.78		3.0206	242.95		3.4504	3147.9		4.64	2584.9		2.3426	2208.9		conserved hypothetical protein		Hypothetical proteins	Conserved
DVU2756	2.6199	204.22		2.6498	235.5	1	3.9216	129.97		3.4502	2331.7	2	5.3754	1771.1	5	3.2829	1599.4	1	radical SAM domain protein		Unknown function	Enzymes of unknown specificity
DVU3064	2.8333	152.15		3.1265	184.35		3.75	131.43		3.4483	1227.5		6.6209	1028		2.7474	510.93		sensory box/GGDEF domain/EAL domain protein		Regulatory functions	Small molecule interactions
DVU2601	0.52067	10.45		2.274	16.125		2.9524	40.25		3.4472	705.47		5.3154	534		3.9143	498.77		hypothetical protein		Hypothetical proteins
DVU0980	1.6054	63.375								3.4471	2125	3	4.8012	1707.9	2	2.5683	957.97	1	DAK2 domain protein		Unknown function	General
DVUA0021	3.295	252.5		3.2877	245.03		2.1036	305.25		3.4463	1033.4		5.3031	966.11		2.3275	694.99		conserved hypothetical protein		Hypothetical proteins	Conserved
DVU2663	2.9718	440.95		2.1541	347.4		2.5377	293.8		3.4462	548.07		3.6915	475.42		2.7926	422.97		conserved hypothetical protein		Hypothetical proteins	Conserved
DVU0685	3.0873	285.65		2.6205	237.9		4.2638	307.5		3.4428	2755.9		4.8808	2457.3		3.4688	2107.9		phosphomannomutase	5.4.2.8	Energy metabolism	Sugars
DVU0898	4.3368	889.85	4.33333	2.6872	457.28	1.33333				3.4415	2555.7	1	4.5718	1680.6	12.5	2.1265	961.58	12	conserved hypothetical protein		Hypothetical proteins	Conserved
DVU2103	7.5529	6521.6	2.66667	19.439	4919.3	18.3333	7.8539	4450.5	4.66667	3.4378	1442	145	5.4002	1818.7	142	2.9843	1504.3	98	iron-sulfur cluster-binding/ATPase domain protein		Unknown function	General
DVU0361	1.7547	77		1.8714	66.9		1.2275	97.725		3.4375	425.89		3.5265	397.28		2.5143	341.92		acetolactate synthase III, small subunit, putative		Amino acid biosynthesis	Pyruvate family
DVU2310							3.366	247.2	1.33333	3.4363	2859.6	6	6.4466	1870.2	4.5	2.9924	1548.3	3.5	metallo-beta-lactamase family protein		Unknown function	Enzymes of unknown specificity
DVU2147	2.689	136.65		2.4391	129.45		4.156	70.925		3.4361	991.03		4.0016	1025.5		3.2737	561.31		L-serine dehydratase, putative		Energy metabolism	Amino acids and amines
DVU2187	2.118	180.47		2.1913	225.2		1.655	138.08		3.4359	507.58		3.9266	477.12		2.5272	392.32		hypothetical protein		Hypothetical proteins
DVU3314	4.7298	318.6		4.3075	241.95		4.4155	260.2		3.4354	787.98	2.5	5.5177	804.59	5.5	3.5614	501.69	4.5	peptidase, U32 family		Protein fate	Degradation of proteins, peptides, and glycopeptides
DVU3089	2.1508	217.13		2.1811	88.575		1.3188	142.68		3.4333	2852.9		4.7107	2944.5		3.11	3539		hypothetical protein		Hypothetical proteins
DVU1947	3.4455	586.37		2.6411	428.05		2.4421	577.45		3.4318	2212.6		4.8688	1751		2.4815	1062.3		pyruvate ferredoxin oxidoreductase, gamma subunit, putatives		Energy metabolism	Anaerobic
DVU1522	1.9093	107.15		2.0154	153.45		2.3469	187.65		3.4313	520.33		3.5712	638.81		2.2254	651.24		hypothetical protein		Hypothetical proteins
DVU2713	2.2974	153.9		2.0463	188.43		1.2872	88.275		3.4309	304.29		3.1112	351.88		2.7136	378.81		conserved hypothetical protein		Hypothetical proteins	Conserved
DVU1294	1.7899	89.475		2.0862	121.6		5.13	217.62		3.4293	2541.9		6.2052	1839.9		4.7895	3223.8		conserved hypothetical protein		Hypothetical proteins	Conserved
DVU2036	2.0271	137.53		2.3092	185.2		2.6013	181.4		3.4275	1914.1		4.2722	1086.7		5.0692	350.61		helix-turn-helix protein, CopG family		Unknown function	General
DVU0479	3.6259	148.78		2.8686	146.4		3.8465	112.5		3.4269	556.3		4.0799	436.23		3.2462	328.73		serine/threonine protein kinase, putative		Regulatory functions	Protein interactions
DVU0865	2.4662	264.55		2.8437	256.6		4.1314	262.35		3.4268	3115.7	3.5	4.938	1947	5	2.5084	1077.3	3	membrane-associated zinc metalloprotease, putative		Protein fate	Degradation of proteins, peptides, and glycopeptides
DVU2165	2.5207	327.83		2.3685	330.53		2.0434	247.15		3.4266	423.53		3.9954	457.35		2.8103	298.2		lysozyme, putative		Cell envelope	Biosynthesis and degradation of surface polysaccharides and lipopolysaccharides
DVU2768	2.3593	118.8		1.8259	128.9		1.8966	204.92		3.4262	430.05		3.421	628.35		2.6298	480.76		comF family protein		Cellular processes	DNA transformation
DVU2392	2.1022	196.25		2.0713	202.27		2.5436	371.2		3.4236	2967.5		3.4884	2481.5		2.6223	1476.9		type III secretion chaperone, CesT family		Cellular processes	Pathogenesis
DVU2632	1.7105	80.125		2.0376	84.6		0.86197	47.65		3.422	337.63		3.7721	301.74		3.0587	289.87		hypothetical protein		Hypothetical proteins
DVU2460	2.2844	278.78		2.229	269.27		2.2289	203.7		3.4216	1757.7	6.5	4.4954	1934.4	3	2.5	1239	5.5	hypothetical protein		Hypothetical proteins
DVU1098	1.9694	149.47		2.1999	159.3		1.6438	157.28		3.4207	2076		4.5656	1691.6		2.7841	1242.2		adenine specific DNA methyltransferase, putative		DNA metabolism	Restriction/modification
DVU0113	2.6844	268.95		2.5704	238.07		2.3389	243.62		3.4201	1422.4		4.9887	1547.4		3.6432	1909.2		phosphoribosyl-AMP cyclohydrolase (hisI)	3.5.4.19	Amino acid biosynthesis	Histidine family
DVU0010	2.3138	254.23		2.3619	331.72		2.1168	300.52		3.4175	865.75		3.8403	673.39		2.6263	681.35		TRAP transporter, DctQ family		Transport and binding proteins	Carbohydrates, organic alcohols, and acids
DVUA0048	3.9626	238.87		2.179	206.55		1.8785	144.28		3.4148	349.08		2.836	331.18		2.5884	340.67		exopolysaccharide production protein, putative		Cell envelope	Biosynthesis and degradation of surface polysaccharides and lipopolysaccharides
DVU2339	2.6533	286.88		2.6915	308.63		1.788	227.75		3.4132	3840.7		4.1416	3186.4		3.0305	3447.4		ribosomal protein L11 methyltransferase, putative		Protein synthesis	Ribosomal proteins: synthesis and modification
DVU0551	2.12	271.53		2.7968	235.6	3	3.8423	263.6		3.4115	3474.6	7	5.0385	2295.1	10.5	2.9258	1404.2	3	high-affinity branched-chain amino acid ABC transporter ATP-bindingsprotein		Transport and binding proteins	Amino acids, peptides and amines
DVU1679	2.2325	264.3		2.2677	270.35		2.1629	252.58		3.4092	2645		3.7811	3379		3.6871	2535.3		isopentenyl-diphosphate delta-isomerase (idi)		Biosynthesis of cofactors, prosthetic groups, and carriers	Chlorophyll
DVU2205	6.2519	545.22		3.5991	420.25		10.679	443.25		3.4073	2419.5		5.4575	2449.8		2.1564	1883.2		tryptophan-specific transport protein		Transport and binding proteins	Amino acids, peptides and amines
DVU1165	2.3021	146.13		3.1319	188.9		4.7598	197.25		3.4072	1525.3		4.52	1089.5		2.9095	691.13		pyridine nucleotide-disulfide oxidoreductase		Unknown function	Enzymes of unknown specificity
DVU2450	1.8932	220.53		2.013	292.25		1.7676	294.07		3.4072	3637.3		3.8964	4169.9		4.5683	3648.2		conserved hypothetical protein		Hypothetical proteins	Conserved
DVU2525	1.4222	69.275		2.5755	15.425		2.2628	117.55		3.4068	1142.2		5.2695	1056.6		3.569	881.2		periplasmic [NiFe] hydrogenase, small subunit, isozyme 2 (hynB-2)s	1.18.99.1	Energy metabolism	Electron transport
DVU0983	2.5876	409.12		2.5291	467.77		2.4442	585.98		3.4057	3837.7		3.6548	3268.2		2.6173	1684.6		conserved hypothetical protein		Hypothetical proteins	Conserved
DVU0652	0.84245	42		2.1493	50.375		2.0892	220.47		3.396	2276.9		4.4911	1490.8		2.7776	1173.6		chemotaxis protein CheV (cheV-2)		Cellular processes	Chemotaxis and motility
DVU0176	2.1656	119.97		2.1673	152.83		1.8029	117.08		3.3948	2063.2		4.2089	2140.5		3.0585	2163.1		glycerophosphoryl diester phosphodiesterase family proteins		Fatty acid and phospholipid metabolism	Degradation
DVU0968	2.1875	162.5		2.6213	75.275		2.8407	138		3.392	4158.7	3.5	5.2548	3507.1	2.5	2.3053	1724.2	1	amino acid ABC transporter, ATP-binding protein		Transport and binding proteins	Amino acids, peptides and amines
DVU0906	2.2071	198.4		2.1474	224.27		2.055	188.1		3.3912	548.97		4.4407	465.45		3.4574	321.66		lipoate-protein ligase B (lipB)		Protein fate	Protein modification and repair
DVU2900	5.4416	124.68		2.1764	139.55		2.2261	86		3.3878	2655.8		5.405	2230.4		2.5509	1306.6		amidohydrolase family protein		Unknown function	Enzymes of unknown specificity
DVU1829	1.5573	73.075		1.9937	137.85		1.4096	132.15		3.3865	359.24		3.6923	320.7		3.2079	303.62		hypothetical protein		Hypothetical proteins
DVU1000	2.6933	195.77		2.6266	195.55		2.8787	166.65		3.3852	1869.4		5.9542	1803.7		2.9723	819.08		peptidase, M24 family		Protein fate	Degradation of proteins, peptides, and glycopeptides
DVU3207	6.2636	314.3		5.5626	302		4.7951	220.35		3.3845	2350.7	1.5	8.5991	2239.8	5.5	3.8633	1317.7	1	RNB-like family protein		Unknown function	Enzymes of unknown specificity
DVU1002	2.1888	279.58		2.0232	229.02		1.6254	242.18		3.3841	5391.4		3.5818	4347.1		2.2683	1604.1		conserved domain protein		Hypothetical proteins	Domain
DVU0567	3.8504	408.35		4.6382	442.15		9.2132	395.35		3.3794	2981.6		5.482	3134.4		2.9001	1271.4		TerC family protein		Unknown function	General
DVU1606	2.3916	308.2		3.0365	312.73		3.7893	273.33		3.3793	1720.5		5.7663	1293.6		2.6245	1154.6		potassium uptake protein, TrkA family		Transport and binding proteins	Cations
DVU3044	2.6135	163.65		2.0044	141.1		1.2596	123.22		3.3702	941.27		4.684	738.02		2.9956	558.61		hypothetical protein		Hypothetical proteins
DVU0262	3.3337	2034.4		3.2426	982.88		7.0857	2539.6		3.3701	7234.6		3.6362	7044.7		3.4524	3460.6		hypothetical protein		Hypothetical proteins
DVU2844	2.3261	239.5		2.1027	198.18		2.8173	263.75		3.3701	940.71		5.0415	872.2		2.9104	908.65		hypothetical protein		Hypothetical proteins
DVU2719	2.0301	174.23		2.3941	186		1.8622	309.25		3.3673	681.44		4.9945	703.86		2.7005	879.68		conserved hypothetical protein		Hypothetical proteins	Conserved
DVU2849	1.6867	73.6		2.3068	53.775		1.5231	93.275		3.365	1037.3		4.8397	1027.1		2.1683	722.62		tail fiber protein, putative		Other categories	Prophage functions
DVU1215	2.1479	220.93		2.3844	243.75		3.1696	231.9		3.3639	1508.3		4.901	1347.9		3.6237	843.5		PAP2 family protein		Unknown function	General
DVU2765	2.865	402		3.1372	405.2		3.747	363.7		3.3619	4857.8	1	4.6198	4575.1	2.5	2.4164	2163.9	2	metallo-beta-lactamase family protein		Unknown function	Enzymes of unknown specificity
DVU2934	4.4037	339.42		3.6756	263.9		3.7286	274.45		3.3617	1653		7.4151	1535.2		2.3715	589.83		sigma-54 dependent transcriptional regulator/response regulators		Regulatory functions	DNA interactions
DVU0628	3.6721	388.2	1.66667	2.8745	389.27		4.8862	326.73		3.3617	1483.5		4.2131	1400.6		3.2495	672.09		butyrate kinase (buk)	2.7.2.7	Energy metabolism	Fermentation
DVU3009	3.1018	390.73		2.3929	268.4		3.9589	365.52		3.3613	4076.4	1	5.5576	4322.6	3	2.6444	1148.7	1	radical SAM domain protein		Unknown function	Enzymes of unknown specificity
DVU0905	1.7682	68.1		2.0284	114.18		1.8519	151.43		3.3579	1425.9		4.0678	1256		2.3503	918.61		lipoic acid synthetase (lipA)		Biosynthesis of cofactors, prosthetic groups, and carriers	Lipoate
DVU2937	8.0406	881.72		8.0979	655.8		8.4138	948.78		3.3567	4053.7		8.9527	4532.8		4.5953	1923.2		TPR domain protein/response regulator receiver domain proteins		Unknown function	General
DVU3052	7.0902	194		6.348	231.3		4.1837	220.5		3.3567	1284	4.5	6.7435	1043.7	7	6.8187	693.14	4.5	ABC transporter, ATP-binding protein		Transport and binding proteins	Unknown substrate
DVU0465	0.85771	57.45		2.0521	64.75		2.7427	92.675		3.3563	1912.6	11.5	4.56	997.44	21	2.7344	2146	7	anthranilate synthase, component I		Amino acid biosynthesis	Aromatic amino acid family
DVU3066	3.3389	652.7	1	4.1119	525	1	3.3398	489.9	1	3.354	3244.1	24	5.9698	2675.6	37	3.3626	1147.6	14	DNA-binding protein		Unknown function	General
DVU0315	2.1121	155.72		2.3156	314.77		2.1302	255.7		3.353	2516.5		4.3163	1991		2.6977	864.8		flagellar basal-body rod protein FlgC (flgC)		Cellular processes	Chemotaxis and motility
DVU1233	8.9154	138.6		2.627	89.275		6.0501	222.2		3.3527	891.78		2.2272	756.99		2.3461	492.17		protein-P-II uridylyltransferase, putative		Central intermediary metabolism	Nitrogen metabolism
DVUA0125	2.9254	244.77		2.3664	271.22		2.6921	173.33		3.3512	879.14		3.9998	1073.6		2.0922	539.66		transglycosylase, SLT family		Cell envelope	Biosynthesis and degradation of surface polysaccharides and lipopolysaccharides
DVU1435	0.76741	24.425		2.1471	87.5		2.96	107.4		3.3499	1183.9		3.8375	1190		2.1087	761.36		membrane protein, putative		Cell envelope	Other
DVUA0093	1.9057	106.02		2.2336	141.4		2.1502	109.15		3.3496	579.8		3.7777	682.71		2.2801	347.24		chromate transport family protein		Cellular processes	Detoxification
DVU2059	4.1114	525.1		2.3239	224.33		3.7982	275.93		3.3494	2041.6	113.5	7.1606	4631.2	130	3.5861	907.45	86.5	glycosyl transferase, group 2 family protein		Cell envelope	Biosynthesis and degradation of surface polysaccharides and lipopolysaccharides
DVU1972	1.6034	84.725		2.0695	61.875		1.4331	183.9		3.3489	270.57		3.1417	337.25		3.2797	332.25		hypothetical protein		Hypothetical proteins
DVU0580	2.2364	175.1		2.1322	161.28		2.2102	184.97		3.3473	2173.3		4.8629	2135.7		2.9654	986.07		molybdenum cofactor biosynthesis protein A (moaA)		Biosynthesis of cofactors, prosthetic groups, and carriers	Molybdopterin
DVU2859	4.935	150.8		2.9652	164.95		5.1482	237.32		3.3461	782.1		4.7468	1054.9		3.2556	397		tail sheath protein, putative		Other categories	Prophage functions
DVUA0060	2.1348	141.33		2.0116	87.2		2.6715	191.12		3.3455	332.7		2.9964	411.1		2.6748	290.26		membrane protein, putative		Cell envelope	Other
DVU2906	2.4776	180.3		2.5225	148.13		2.1661	243.73		3.3453	565.91		3.7604	769.83		1.6975	557.04		umuC protein (umuC)		DNA metabolism	DNA replication, recombination, and repair
DVU0772	4.4338	2676.6		6.4602	2178.1		7.3535	7580.9		3.3437	2184.4		15.306	16695		12.72	12417		hypothetical protein		Hypothetical proteins
DVU2023	2.3083	188.15		2.1927	214.95		3.4873	314.52		3.3434	1508.1		5.6184	1319.2		3.0315	719.23		hypothetical protein		Hypothetical proteins
DVU2183	1.981	193.35		2.0883	186.1		2.6852	721.28		3.3421	1903.2		4.6265	2333.4		3.7064	2978.6		hypothetical protein		Hypothetical proteins
DVU0071	2.6751	244.8		3.0082	381.82		2.5962	240.57		3.3417	1538.9		4.1695	1195.6		2.2236	1283.4		DNA polymerase IV (dinP)	2.7.7.7	DNA metabolism	DNA replication, recombination, and repair
DVUA0003	7.4198	137.82		3.3601	84.975		4.0404	195.1		3.3414	2557.2	4	2.7138	2190.6	2.5	1.8883	4194.7	3.5	hypothetical protein		Hypothetical proteins
DVU3069	2.744	208.6		2.6239	179.93		2.2643	224.92		3.3406	5014		5.115	3268.5		1.8592	2379.7		conserved hypothetical protein TIGR00247		Hypothetical proteins	Conserved
DVUA0041	1.7751	107.67		2.7804	88.175		1.5402	89.9		3.3391	339.7		4.3782	333.67		2.1886	277.81		conserved domain protein		Hypothetical proteins	Domain
DVU1151	1.3894	43.7		1.9277	77.425		1.4849	135.93		3.3335	336.64		3.6833	368.52		2.8001	1103.5		hypothetical protein		Hypothetical proteins
DVU2417	2.4239	852.5		2.8846	461.32		2.2898	485.27		3.3312	7503.3		4.6755	7465		3.6593	4516.7		SlyX protein		Unknown function	General
DVU2167	1.3661	37.45		2.2159	60.05		0.83287	32.85		3.3305	446.73		3.8736	387.72		2.8915	329.15		hypothetical protein		Hypothetical proteins
DVU1504	0.81824	16.625		2.3915	46.625		1.2	57.175		3.33	664.93		4.1406	978.83		2.4858	637.7		terminase, small subunit		Other categories	Prophage functions
DVU1698	1.9202	171.05		2.1814	189.63		2.0234	298.55		3.329	426.6		3.6294	632.87		2.3895	1072.2		hypothetical protein		Hypothetical proteins
DVU1593	4.0186	1024					4.9029	1656.7		3.3273	1874.4	2.5	4.4683	939.71	3.5	2.7996	1023	1	chemotaxis protein CheY (cheY-1)		Cellular processes	Chemotaxis and motility
DVU1885	4.6095	493.55					2.9095	309.1	2.66667	3.3267	1449.7	17	6.0225	1494.6	30	3.6512	800.14	26.5	glutamyl-tRNA(Gln) amidotransferase, B subunit (gatB)	6.3.5.-	Protein synthesis	tRNA aminoacylation
DVU1111	8.1795	227.32		3.9706	235.43		6.4695	270.75		3.3262	931.35		5.788	1298.4		2.1362	927.81		hypothetical protein		Hypothetical proteins
DVU1687	2.4435	275.58		2.088	250.4		2.1774	286.6		3.3258	1184.3		3.897	1094.3		2.679	484.51		glycosyl transferase, group 2 family protein		Cell envelope	Biosynthesis and degradation of surface polysaccharides and lipopolysaccharides
DVUA0017	2.1463	293.62		1.8336	318.72		1.9085	362.2		3.3253	7599.4		3.0487	4542		3.0629	2983.7		hypothetical protein		Hypothetical proteins
DVU2505	2.5019	213.52		2.329	178.48		2.6801	139.98		3.3236	2169.6		6.0791	1637.8		2.8524	711.39		cell cycle protein, FtsW/RodA/SpoVE family		Cellular processes	Cell division
DVU1705	9.653	234.52		6.7474	232.03		12.939	870.15		3.3228	1531.7		5.3024	1112.8		2.9195	1293.9		type I restriction-modification enzyme, S subunit		DNA metabolism	Restriction/modification
DVU0348	3.617	163.27		2.5517	222.35		3.6583	178.77		3.3218	2080.3		5.0294	1640.7		1.8119	673.45		hypothetical protein		Hypothetical proteins
DVU1076	3.5612	786.4		1.7248	396.07		1.723	277.35		3.3213	9416.4		7.8725	14048		6.8046	9914.7		conserved hypothetical protein TIGR00278		Hypothetical proteins	Conserved
DVU2953	3.1931	243.28		2.9977	287.82		3.3015	174.4		3.32	938.65		6.1936	852.73		2.4402	790.35		transcriptional regulator, GntR family		Regulatory functions	DNA interactions
DVU0099	5.9088	283.1		3.5534	282.75		6.5763	337.98		3.3197	1743.1		5.1734	1430.4		1.4315	1150.3		TonB domain protein		Unknown function	General
DVU1738	1.4567	53.075		2.2503	94.025		1.4299	155.4		3.3194	563.88		3.8982	549.49		2.5706	683.47		site-specific recombinase, phage integrase family		DNA metabolism	DNA replication, recombination, and repair
DVU1536	3.4725	271.9		2.7793	290		5.1054	425.95		3.3168	1276.1		4.1896	1100.4		2.8341	674.12		transglycosylase, SLT family		Cell envelope	Biosynthesis and degradation of surface polysaccharides and lipopolysaccharides
DVU0724	3.9419	138.67		2.5057	93.825		6.1154	111.25		3.3157	5299.4		5.3648	3650.3		5.3647	3550.4		sodium/alanine symporter family protein		Transport and binding proteins	Amino acids, peptides and amines
DVU1505	1.8194	88		1.8642	118.63		1.5899	180.38		3.3125	386.92		3.3899	376.3		2.2647	1561.9		holin, putative		Other categories	Prophage functions
DVU2983										3.3118	3518.1	30.5	4.0261	2441.5	24.5	5.6007	3333.2	32.5	3-isopropylmalate dehydratase, small subunit (leuD)	4.2.1.33	Amino acid biosynthesis	Pyruvate family
DVU2414	3.1731	120.87		2.7056	184.35		4.8194	189.4		3.3064	864.84		3.281	899.54		1.8287	762.86		hypothetical protein		Hypothetical proteins
DVUA0082	2.4898	132.97		2.3832	216.1		1.8172	114.43		3.3064	2367.9		4.1176	1367		3.6022	5320.9		site-specific recombinase, phage integrase family		DNA metabolism	DNA replication, recombination, and repair
DVU1697	2.5033	314.5		2.3921	395.15		2.7829	398.75		3.305	464.34		3.4308	394.8		2.1695	755		hypothetical protein		Hypothetical proteins
DVU1948	2.1254	285.22		2.1458	227.93		1.6227	236.03		3.3029	3646.9		4.5971	3349.6		2.8396	1304.9		conserved hypothetical protein		Hypothetical proteins	Conserved
DVU2805	4.4586	316.58		2.7662	357.22		3.1379	237.85		3.3027	1349.9		4.6841	1100.2		3.0033	546.01		cobalamin synthesis protein/P47K family		Unknown function	General
DVU1775	5.9842	516.33		2.6716	239.87		2.6318	183.62		3.3016	3577.4	1	5.962	5031.8	1	5.0357	6618.6	1	3,4-dihydroxy-2-butanone 4-phosphate synthase (ribB)		Biosynthesis of cofactors, prosthetic groups, and carriers	Riboflavin, FMN, and FAD
DVU1894	2.2886	304.77		1.9896	345.18		1.5493	195.77		3.2991	4029.2		4.8697	5044.4		3.0996	2533.6		hypothetical protein		Hypothetical proteins
DVU1988	2.6505	314.55		2.2183	255.07		2.2998	196.5		3.2987	941.44		3.7691	2555		2.8581	631.05		membrane protein, putative		Cell envelope	Other
DVU2069	2.7425	137.8		1.9056	97.575		10.518	150.48		3.2985	1316.2		2.1765	811.21		3.717	658.6		DNA processing protein DprA, putative		Cellular processes	DNA transformation
DVU3286	1.2962	30.225		2.0335	53.525		1.0214	72.25		3.2978	294.04		3.3093	317.55		3.3991	258.73		hypothetical protein		Hypothetical proteins
DVU0080							2.9779	83		3.2972	1145.9		4.4207	2476.6		6.4488	5175.7		fumarate hydratase, class II (fumC)	4.2.1.2	Energy metabolism	TCA cycle
DVU2731	2.5209	217.95		2.4353	234.4		1.7852	285.15		3.295	507.41		3.8903	548.25		2.0853	416.12		tail fiber assembly protein, putative		Other categories	Prophage functions
DVU2993	5.4467	151.15		1.939	155.17		3.4972	230.13		3.2944	2114		4.3162	2347.6		3.9838	1542.6		glycosyl transferase, group 1/2 family protein		Cell envelope	Biosynthesis and degradation of surface polysaccharides and lipopolysaccharides
DVU1105	2.3123	171.97		2.3796	197.93		1.7136	155.8		3.2944	401.76		3.5906	364.57		1.9194	403.08		hypothetical protein		Hypothetical proteins
DVU2116	2.2226	259.15		2.6752	489.8		2.5248	378.05		3.2936	625.4		3.9586	402.75		2.825	314.4		pilin, putative		Cell envelope	Surface structures
DVU0144	2.0685	116.05		2.4216	99.9		1.4486	132.37		3.2935	1225.3		3.7311	1020.4		2.8997	705.19		cytidyltransferase-related domain protein		Unknown function	General
DVU0104	3.5244	175.37		2.6963	231.27		3.5934	257.05		3.293	1005.7		2.7709	1046.5		2.3385	806.5		cation ABC transporter, permease protein, putative		Transport and binding proteins	Cations
DVU1535	2.6852	304.55		2.1147	211.65		2.3904	320.67		3.2919	872.37		3.6517	809.2		2.9992	769.42		membrane protein, putative		Cell envelope	Other
DVU0296	2.4983	233.3	3	2.7166	98.025					3.29	3557	7.5	4.6294	2905.8	15	2.7045	1899.2	1	peptidase, M24 family		Protein fate	Degradation of proteins, peptides, and glycopeptides
DVU0933	2.3697	178.57		2.8546	171.37		6.2437	253.92		3.2898	865.67		4.2891	684.13		3.2096	1253.3		response regulator		Regulatory functions	Protein interactions
DVU0611	1.4164	57.4		2.7965	25.625		1.3054	47		3.2889	1994.4		5.6505	2005.1		2.8768	2185.1		ABC transporter, ATP-binding protein		Transport and binding proteins	Unknown substrate
DVU2042	1.5824	92.725		2.4527	189.58		3.0793	205.8		3.2879	1798.4		6.3708	1043.7		3.5057	708.14		Fic family protein		Unknown function	General
DVU0090	2.8428	347.52		2.4856	251.6	3	2.1694	255.98		3.2868	1925.5	5.5	4.8932	1821.1	7	3.5626	1872	3.5	GDP-fucose synthetase (wcaG)	1.1.1.271	Cell envelope	Biosynthesis and degradation of surface polysaccharides and lipopolysaccharides
DVU2031	2.0278	215.88		1.8498	320.48		2.2328	557.5		3.2865	6669.6		2.8394	3547.8		2.5079	1255.2		hypothetical protein		Hypothetical proteins
DVUA0028	2.2311	281.15		2.0149	199.15		2.767	655.55		3.2856	3625.8		3.4311	2918.4		4.1362	3765.1		hypothetical protein		Hypothetical proteins
DVU2340	2.0743	191.6		2.3543	128.2		3.9183	163.03		3.2844	9238.9		6.0022	11276		7.0006	11625		amino acid ABC transporter, permease protein, His/Glu/Gln/Arg/opinesfamily		Transport and binding proteins	Amino acids, peptides and amines
DVU1131	1.963	182.52		1.8613	156.3		1.4352	178.13		3.2808	375.87		3.3198	427.89		2.4526	478.93		hypothetical protein		Hypothetical proteins
DVU2703	1.5452	58.225		2.3269	46.925		1.1119	94.35		3.2807	348.44		3.7867	400.4		3.6737	342.85		hypothetical protein		Hypothetical proteins
DVU0280	4.6503	398.88		2.3346	222.88		2.348	246.48		3.2805	4860.1		5.9048	3841		2.464	859.65		glycosyl transferase, group 1 family protein		Cell envelope	Biosynthesis and degradation of surface polysaccharides and lipopolysaccharides
DVU2038	1.662	95.3		2.0447	89.575		2.0417	264.3		3.279	3938.2		3.7277	2481.5		2.9537	1647		hypothetical protein		Hypothetical proteins
DVU1983	2.3548	180.07		2.2345	145.13		2.7308	201.22		3.2766	1293.5		4.3977	1366.2		2.4462	576.9		hypothetical protein		Hypothetical proteins
DVU2968	3.5257	343.45		2.9946	234.5		7.3218	434.05		3.2765	3817.8		4.7113	3968.2		2.7478	2099.3		sensor histidine kinase/response regulator		Regulatory functions	Protein interactions
DVU0888	2.3684	214.63		3.3523	188.55		3.503	191.98		3.2742	636.36		5.104	571.52		3.4016	496.24		response regulator		Regulatory functions	Protein interactions
DVU1194	2.3579	93.65		2.5361	182.5		1.5731	138.28		3.2741	1628.7		4.6189	1307.9		2.039	1059.2		hypothetical protein		Hypothetical proteins
DVUA0151	2.2156	216.45		2.5075	205.4		2.1366	280.2		3.274	1254.1		3.8882	2254.2		2.365	1704.5		DNA-binding protein, putative		Unknown function	General
DVU0432	2.11	222.9		2.2356	133.13		3.12	595.6		3.2723	1439.7		4.5553	1341.4		3.179	662.32		Ech hydrogenase, subunit EchC, putative		Energy metabolism	Electron transport
DVU2120	2.0414	125.38		2.161	104		1.4948	223.88		3.2717	434.92		4.0175	855.16		2.6529	379.77		hypothetical protein		Hypothetical proteins
DVU3285	1.7324	131.25		2.0107	148.3		1.4788	221.5		3.2715	299.46		3.5216	328.64		3.2677	311.67		hypothetical protein		Hypothetical proteins
DVU2809	3.1062	447.42		2.3218	395.15		2.1025	601.5		3.2693	1212.1		4.8231	1022		2.8728	868.51		cytochrome c3		Energy metabolism	Electron transport
DVU0440	2.8775	84.525		2.7961	61.8		5.0804	115.8		3.2662	1207.7		3.4119	1025.6		2.8692	650.35		conserved hypothetical protein		Hypothetical proteins	Conserved
DVU1735	1.6351	93.875		1.8655	162		1.7529	252.7		3.2662	337.38		3.3523	398		3.3492	269.15		hypothetical protein		Hypothetical proteins
DVU3159	2.7111	225.33		2.4177	140.52		3.5807	167.65		3.2647	3828.9		4.4455	2925.7		3.1839	2043.5		glycerol-3-phosphate dehydrogenase (NAD(P)+) (gpsA)	1.1.1.94	Energy metabolism	Other
DVU0853	2.7915	263.65		2.3631	225.6		3.5327	229.93		3.2637	1399.5		5.7369	1504		2.8288	907.33		conserved hypothetical protein		Hypothetical proteins	Conserved
DVU0220	3.6305	296.8		2.593	231.25		3.6911	321.7		3.2613	6109.7		5.461	6519.5		1.7612	2317.9		tail fiber protein, putative		Other categories	Prophage functions
DVU0464	2.8719	313.45		2.5674	339.2		2.5412	383.75		3.2605	1962.7	4.5	4.4322	1428.3	2	2.7029	2318.2	1	prephenate dehydrogenase	1.3.1.12	Amino acid biosynthesis	Aromatic amino acid family
DVU0157	2.8037	329.98		2.2164	318.18		2.0266	332.85		3.2592	6710.4		5.4501	7559		6.3146	5092.3		thiamin-monophosphate kinase (thiL)	2.7.4.16	Biosynthesis of cofactors, prosthetic groups, and carriers	Thiamine
DVU0626	4.9318	1004.4		3.8591	726.33		3.0418	737.1		3.2586	2402	5.5	4.6595	3090.1	3.5	3.2195	1584.7	2.5	acetolactate synthase, small subunit (ilvN-1)	4.1.3.18	Amino acid biosynthesis	Pyruvate family
DVUA0116	2.2232	190.63	4.33333				1.1106	89.45	1.66667	3.2582	4010.2	5	3.5334	3936	10	2.6752	928.79	3.5	conserved hypothetical protein		Hypothetical proteins	Conserved
DVUA0079	2.7751	612.77		2.383	380.1		2.2534	273.3		3.2567	3158.1		4.8312	3314.8		2.8713	1574.4		adenylylsulfate kinase (cysC)	2.7.1.25	Central intermediary metabolism	Sulfur metabolism
DVU3246	3.2743	145.47		2.0298	112.93		1.9933	180.68		3.2523	785.92		3.5949	923.52		2.1489	496.78		RND efflux system, outer membrane protein, NodT family		Cellular processes	Detoxification
DVU1899	1.9511	130.4		1.9248	85.5		1.991	180.93		3.2502	582.12		3.3596	737.12		2.6916	566.27		DNA repair protein RecO, putative		DNA metabolism	DNA replication, recombination, and repair
DVU2363	1.7579	75.55		2.0507	77.725		1.8994	95.15		3.2492	813.92		3.5371	795.56		2.672	721.8		hydroxyethylthiazole kinase (thiM)	2.7.1.50	Biosynthesis of cofactors, prosthetic groups, and carriers	Thiamine
DVU1071	2.624	441.08		2.8226	590.1		1.8506	393.9		3.249	3169.5		3.9139	2796.6		2.7805	2041.4		hypothetical protein		Hypothetical proteins
DVU0540	3.1409	247.48		4.9451	324.3		10.644	243.73		3.2487	658.04		5.0041	623.39		4.1593	581.82		sensor histidine kinase		Regulatory functions	Protein interactions
DVU0768	1.8227	63.3		2.1277	166.15		1.7861	124.68		3.2476	1799.8	3	4.27	1367.4	2	2.6022	895.43	1	glutamate racemase (murI)	5.1.1.3	Cell envelope	Biosynthesis of murein sacculus and peptidoglycan
DVU2152	1.8916	53.8		2.5666	29.9		2.889	101.25		3.2473	786.72		3.1746	825.27		2.523	521.79		hypothetical protein		Hypothetical proteins
DVU0016	1.7562	137.1		1.9792	100.72		1.5337	166.97		3.2465	339.69		2.9989	499.52		2.8374	520.62		hypothetical protein		Hypothetical proteins
DVU0548	1.1609	117.12		2.5931	42.825		2.1919	81.625		3.2454	3991.2		4.8529	1427.3		2.5829	1348		high-affinity branched-chain amino acid ABC transporter, permeasesprotein		Transport and binding proteins	Amino acids, peptides and amines
DVU2446	3.5094	246.1		2.5875	278.2		2.9394	198.1		3.2435	1793		4.4353	1734.9		3.0896	951.59		3-methyl-2-oxobutanoate hydroxymethyltransferase (panB)s	2.1.2.11	Biosynthesis of cofactors, prosthetic groups, and carriers	Pantothenate and coenzyme A
DVU0493	2.4378	532.92		2.1992	391.97	1	1.921	227.48		3.2434	3114.7	1	3.6189	2688.2	3.5	3.0966	1624.5	1	hypothetical protein		Hypothetical proteins
DVU1471	2.7073	882.35		3.1507	948.4		4.9624	2275.7		3.2406	3737.5		3.7283	3920.4		2.9741	2939.1		heat shock protein, Hsp20 family		Protein fate	Protein folding and stabilization
DVU0469	2.4235	172.63		2.0359	171.02		1.3567	105.15		3.2329	1704.8		3.6524	1158.5		4.1388	2280		N-(5-phosphoribosyl)anthranilate isomerase (trpF-1)	5.3.1.24	Amino acid biosynthesis	Aromatic amino acid family
DVU0285	2.1205	133.55		2.1099	144.23		1.7822	152.07		3.2306	3401.9		5.0012	3005.1		7.431	4051.5		imidazole glycerol phosphate synthase, glutamine amidotransferasessubunit (hisH)	2.4.2.-	Amino acid biosynthesis	Histidine family
DVU2641	2.9342	308.77		2.6513	385.88		2.4586	307.48		3.2295	1998.9	3	4.0396	1344.8	1	2.627	708.47	1	lipoprotein, putative		Cell envelope	Other
DVU2234	2.0753	121.68		2.3778	156.9		2.5726	135.7		3.2294	1798.4		4.3512	1562.8		2.44	1216.9		conserved hypothetical protein TIGR00275		Hypothetical proteins	Conserved
DVU2575	2.746	168.75	3.66667	2.2688	179.07	3	2.4693	121.22	3.33333	3.2293	2913.5		4.6584	1823.7		2.011	1311.3		peptidase, M20/M25/M40 family		Protein fate	Degradation of proteins, peptides, and glycopeptides
DVU1026	2.7739	295.13		3.2858	225.67		5.7198	193.88		3.2292	3510.3		5.2875	2039.9		2.9272	872.38		uracil permease (uraA)		Transport and binding proteins	Nucleosides, purines and pyrimidines
DVU0923	1.8645	196.22		2.4347	218		3.3064	322.2		3.2291	1456.6		4.364	1967.4		3.7077	1699.9		endoribonuclease, L-PSP family		Transcription	Degradation of RNA
DVU2261	5.8666	185.2		2.3301	243.88		4.2081	157.95		3.2286	1379.1		3.244	1458.9		1.6768	1195.9		hypothetical protein		Hypothetical proteins
DVU3237	5.5438	199.52		2.9448	170.77		4.8326	210.3		3.2252	899.05		3.0254	1100.9		1.8447	539.46		phosphoenolpyruvate synthase-related protein		Unknown function	General
DVU0334	1.2795	27.9		2.0131	15.675		0.94593	20.575		3.2252	6945.8		4.2332	4246.8		3.0695	2905.8		D-alanine--D-alanine ligase	6.3.2.4	Cell envelope	Biosynthesis of murein sacculus and peptidoglycan
DVU0354	3.9997	365.02		2.7093	413.75	1	3.135	234.22		3.225	3023.3	10.5	5.6893	2763.2	10.5	2.3849	1443.8	4	conserved domain protein		Hypothetical proteins	Domain
DVU2652	3.9617	312.47		2.1599	142.17		3.6722	416.65		3.2235	2978.3		6.5661	2351.9		16.229	13592		hypothetical protein		Hypothetical proteins
DVUA0008	3.4127	197.97		2.5239	179.32		4.8575	239.93		3.2219	329.59		3.9784	432.78		2.6024	284.34		nitrogenase molybdenum-iron cofactor biosynthesis protein NifN,sputative		Central intermediary metabolism	Nitrogen fixation
DVU0098	1.7084	102.8		3.1715	153.13		3.0222	174.25		3.2215	1468.8	1.5	6.8445	1418.3	1	3.931	465.75	1	polyamine ABC transporter, ATP-binding protein (potA)		Transport and binding proteins	Amino acids, peptides and amines
DVU3259	2.8723	389.85		2.2452	259.28		1.7185	271.98		3.22	3148.6	3	5.0436	3026.5	1	2.5623	1222.6	1	exodeoxyribonuclease III (xth)	3.1.11.2	DNA metabolism	Degradation of DNA
DVU1416	1.5848	67.775		2.1913	132.1		1.2922	114.65		3.2197	757.43		4.2832	943.52		2.4112	507.89		hypothetical protein		Hypothetical proteins
DVU0666	2.06	165.48		2.4602	154.5		3.46	213		3.2168	1813.5		5.7554	1498		2.0858	1051.1		HD domain protein		Unknown function	General
DVU3053										3.2162	4708.1	4.5	4.8558	3225.6	12	2.8833	1971.8	6	conserved hypothetical protein		Hypothetical proteins	Conserved
DVU1799	3.4637	261		3.3579	190.98	1	4.8886	177.5		3.2149	1578.5	47	3.5242	1589	43	1.1225	1441.5	36.5	translation elongation factor G (fusA-2)		Protein synthesis	Translation factors
DVU2344	1.6355	87.7		1.9227	134.9		1.8055	246.93		3.2141	389.67		3.4221	435.94		2.9759	357.85		hypothetical protein		Hypothetical proteins
DVU0701	5.0708	277.87	8.66667	3.026	159.23	8	4.4724	328.22	10.6667	3.2122	5151.1	8	5.2453	4184.7	17.5	2.2117	2163.9	5	malate synthase G (glcB)	4.1.3.2	Energy metabolism	TCA cycle
DVU0893	2.8975	369.97					2.2731	403.85		3.2104	4173.2	10	3.8297	3081.1	13	2.9422	2534.9	10	universal stress protein family		Cellular processes	Adaptations to atypical conditions
DVUA0127	8.7189	210.7		0.64025	293.22		120.2	227.55		3.2099	1605.8		4.5864	1662.7		16.384	911.11		hypothetical protein		Hypothetical proteins
DVU0623	1.9328	148.47		2.0004	95.325		2.8829	344.43		3.2099	569.65		4.0613	608.26		3.2468	303.01		hypothetical protein		Hypothetical proteins
DVU0377	0.63437	19.725		2.67	29.175		1.878	71.475		3.2094	710.61		4.0922	768.31		2.5406	677.51		thioredoxin reductase (trxB-1)	1.8.1.9	Energy metabolism	Electron transport
DVU1803	3.1167	237.65		2.6316	210.4		3.8192	134.5		3.2084	1502.8		3.4456	1386.5		2.541	725.85		glycosyl transferase, group 1 family protein		Cell envelope	Biosynthesis and degradation of surface polysaccharides and lipopolysaccharides
DVU0453	5.9655	200.75		3.3092	235	1.33333	2.7208	202.38		3.2071	3200.6	1.5	3.3589	3402.9	4	1.4553	1365.6	2	ATP-dependent DNA helicase, UvrD/REP family		DNA metabolism	DNA replication, recombination, and repair
DVU2511	2.7796	613.68		2.0223	287.55		1.8814	342.02		3.2057	4559.6		3.425	3340.1		2.8637	1392		hypothetical protein		Hypothetical proteins
DVU0292	3.2314	256		2.8561	320.32		2.7126	210.28		3.2013	2197.7		4.044	1714.6		2.3691	1200.9		hypothetical protein		Hypothetical proteins
DVU0769	3.7149	295.43		2.6662	393.75		2.2208	199.5		3.2007	1916		3.9924	1232.6		2.3088	781.95		pyridoxal kinase, putative		Biosynthesis of cofactors, prosthetic groups, and carriers	Pyridoxine
DVU0337	3.5779	135.05		2.8669	39.475		2.7893	140.05		3.1994	1250.5		4.7735	1029		2.2889	386.74		hypothetical protein		Hypothetical proteins
DVU2504	3.3128	282.58		2.1683	179.62		2.631	181.25		3.1987	5559.4		5.262	3620		2.9289	2237.2		UDP-N-acetylglucosamine--N-acetylmuramyl-(pentapeptide)spyrophosphoryl-undecaprenol N-acetylglucosaminestransferase (murG)	2.4.1.-	Cell envelope	Biosynthesis of murein sacculus and peptidoglycan
DVU3062	3.8019	266.05		5.0351	343.55		11.616	250.6		3.1938	1515.6		2.3427	1205.4		2.919	570.26		sensor histidine kinase/response regulator	2.7.3.-	Regulatory functions	Protein interactions
DVU0771	2.8632	139.63		2.3025	144.5		2.2866	152.17		3.1938	1302.8		3.315	2263.4		2.2632	1766.4		molybdenum-pterin binding domain protein/site-specific recombinase,sphage integrase family		DNA metabolism	DNA replication, recombination, and repair
DVU1202	2.5423	284.67		2.2029	316.55		2.7351	280.38		3.1933	2955.5		5.3891	3480.3		5.9156	5395.4		cytidine/deoxycytidylate deaminase family protein		Unknown function	Enzymes of unknown specificity
DVU1719	3.0845	276.23		2.6833	282.3		2.9055	259.7		3.1915	1273.3		3.9809	1234.3		2.5846	2202.8		conserved domain protein		Hypothetical proteins	Domain
DVU1729	2.0658	309.35		2.5568	360.03		1.9029	380.05		3.1911	1012.6		3.6796	779.59		3.0666	3111.8		killer protein, putative		Unknown function	General
DVU0669	2.5004	236.5		2.184	209.1		4.8152	302.4		3.189	3218.3		5.8651	3396.5		3.1136	1704.9		hypothetical protein		Hypothetical proteins
DVU2907	2.1112	238		2.1257	212.03		1.4691	147.57		3.1883	452.27		3.6083	522.98		3.0446	501.66		umuD protein (umuD)	3.4.21.-	DNA metabolism	DNA replication, recombination, and repair
DVU3276	7.3355	2440.7		4.8194	1668.2		4.529	1300.7		3.1861	724.48	1	4.7517	335.28	1.5	2.84	593.01	1	ferredoxin I		Energy metabolism	Electron transport
DVU1783	5.5386	1299.8		4.3294	837.75		5.7954	1793.9		3.1861	2891.1		6.5399	3507.8		2.917	2177.8		cysteine-rich domain protein		Unknown function	General
DVU0976	2.4752	126.6		2.3619	163.03		1.8921	139.43		3.1828	744.19		3.2289	1704.4		1.5455	726.84		response regulator		Regulatory functions	Protein interactions
DVU0382	1.3767	48.275		2.1051	52.85		1.2933	120.65		3.1823	371.05		3.4554	397.77		3.2539	363.26		hypothetical protein		Hypothetical proteins
DVU1750	2.3645	200.13		2.4444	238.72		5.3241	1253.1		3.1795	1417		5.4499	1683.3		4.5505	1709		hypothetical protein		Hypothetical proteins
DVU3192	2.0048	103.15		2.0464	111.9		1.2056	112.65		3.1785	3379		4.3418	2057.1		2.5875	1348.7		glycosyl transferase, group 1 family protein		Cell envelope	Biosynthesis and degradation of surface polysaccharides and lipopolysaccharides
DVU1225	1.9725	129.33		2.0938	135.9		1.5417	191.38		3.1781	3268.2	1	3.5934	1472.1	1	2.3249	1174.1	1	hypothetical protein		Hypothetical proteins
DVU2002	2.2588	227.8		2.0668	301.08		3.7815	961.35		3.1756	904.87		4.6574	858.77		2.675	1333.1		hypothetical protein		Hypothetical proteins
DVU0715	2.7932	402.7		2.8589	224.82		4.2033	268.9		3.174	2972.6	2	4.7888	2149.3	3	3.6852	1808.3	1.5	branched-chain amino acid ABC transporter, ATP binding proteins		Transport and binding proteins	Amino acids, peptides and amines
DVU2571	10.616	911.38		7.8784	500.35		9.0042	833.9		3.1705	3397	3.5	8.7094	3167.7	8	14.218	10531	6.5	ferrous iron transport protein B (feoB)		Transport and binding proteins	Cations
DVU3335	3.9762	256.78		3.9814	280.03		7.19	295.43		3.1683	2382		5.7909	1850.3		2.3559	526.29		sensory box histidine kinase	2.7.3.-	Signal transduction	Two-component systems
DVU1516	1.8801	139.8		2.0106	196.32		1.5422	142.33		3.1667	490.1		3.818	465.44		2.6492	563.29		hypothetical protein		Hypothetical proteins
DVU3262	6.9326	335.75		2.9632	239.55		3.6343	147.62		3.1643	2366.2		5.358	2041.9		2.7567	619.59		fumarate reductase, flavoprotein subunit (fdrA)	1.3.99.1	Energy metabolism	Anaerobic
DVU1489	1.6817	95.6		1.9844	168.97		1.5098	174.53		3.1643	481.52		3.6684	429.47		2.5342	333.92		hypothetical protein		Hypothetical proteins
DVU3362	1.6556	112.35		2.1133	142.85		1.335	171.47		3.1637	532.91		4.2691	439.18		2.8646	409.16		conserved hypothetical protein		Hypothetical proteins	Conserved
DVU1538	2.2301	239.62		2.1029	247.7		1.6533	206.5		3.1633	1011.5		4.3538	1314.7		2.6141	1031		hypothetical protein		Hypothetical proteins
DVU2795	3.639	683.18		2.2569	305		2.6337	604.5		3.1631	1662.8		4.3246	1200.1		2.6412	513.93		electron transport complex protein RnfE, putative		Energy metabolism	Electron transport
DVU2517	2.0538	211.83		3.0686	263.2		2.169	229.75		3.1621	803.05		4.9914	870.7		2.8577	593.3		conserved hypothetical protein		Hypothetical proteins	Conserved
DVU1662	1.6924	143.38		2.651	129.85		3.6657	249.18		3.1618	3901.3		7.3418	3246.5		2.4686	2496		permease, putative		Transport and binding proteins	Unknown substrate
DVU1340	2.2278	213.8		2.3634	291.83		2.4649	297.7		3.1611	3335.1		3.8139	2758.4		2.3557	1148		transcriptional regulator, Fur family		Regulatory functions	DNA interactions
DVU2989	3.6545	322.58		2.3068	278.38		1.992	200.45		3.1606	927.69		3.0509	672.51		2.3112	1895.7		psp operon transcriptional activator (pspF)		Cellular processes	Adaptations to atypical conditions
DVU1984	2.7886	325		2.9186	538.95		2.3843	356.18		3.1594	4897.4		5.5919	6925.8		3.3688	3912.3		peptide methionine sulfoxide reductase MsrA (msrA)	1.8.4.6	Protein fate	Protein modification and repair
DVU1902	5.1924	263.73		2.7243	215.55		4.4725	197.43		3.1557	3425.2	1	3.7646	1605.2	1	3.2874	1338	2	conserved hypothetical protein		Hypothetical proteins	Conserved
DVUA0144	2.1789	351.38		1.894	328.3		1.6715	275.85		3.1553	374.78		3.6026	349.12		4.2288	196.6		hypothetical protein		Hypothetical proteins
DVU0920	3.8039	1590.5		3.5895	947.88		5.7501	1198.2		3.1519	1014.7		3.8748	1017.6		2.586	1049.5		ATP synthase protein I (atpI)		Energy metabolism	ATP-proton motive force interconversion
DVU2522	2.3929	226.65		2.1735	359.2		2.2344	267.15		3.1468	5388.5	1	4.3988	3572.2	1	4.7335	5464	1	hypothetical protein		Hypothetical proteins
DVU3387	1.651	47.875		2.7191	28.675		2.4106	146.95		3.1408	1495.4		4.9259	1623.2		4.4121	1049.1		hypothetical protein		Hypothetical proteins
DVU1956	2.413	213.38		2.3087	254.5		2.6314	237.45		3.14	1731.9		4.4088	1495.6		2.7122	1346.4		heptosyltransferase family protein		Cell envelope	Biosynthesis and degradation of surface polysaccharides and lipopolysaccharides
DVU1877	2.744	153.82		2.3838	231.15		1.9973	173.83		3.1372	5125.1		4.0428	2798.4		2.2885	1666.4		polysaccharide deacetylase family protein		Energy metabolism	Biosynthesis and degradation of polysaccharides
DVU2861	2.6558	269.38		2.2446	288.87		2.5847	351.42		3.1352	744.86		3.4813	1250.5		2.6805	349.1		hypothetical protein		Hypothetical proteins
DVU0872	2.5529	274.95		2.1047	190.27		2.0873	255.37		3.132	2877		5.3061	3612.4		5.2344	6109.4		glycosyl transferase, group 2 family protein		Cell envelope	Biosynthesis and degradation of surface polysaccharides and lipopolysaccharides
DVU1815	4.911	439.87		2.9752	324.93		7.1225	833.88		3.1313	632.27		3.446	439.53		3.2019	213.17		cytochrome c oxidase, subunit I, putative		Energy metabolism	Electron transport
DVU2624	1.7225	111.52		2.1369	212.75		1.716	179.1		3.1294	434.1		4.1119	392.81		3.4958	351.51		hypothetical protein		Hypothetical proteins
DVU3086	3.2781	168.72		1.9789	159.15		2.7301	90.4		3.1273	2106.9		3.9356	2157.6		3.473	1726		cobyrinic acid a,c-diamide synthase (cobB-2)		Biosynthesis of cofactors, prosthetic groups, and carriers	Heme, porphyrin, and cobalamin
DVU3269	5.2313	318.42		5.8543	539.17		8.5521	593.13		3.1272	791.28		5.8143	889.93		2.7069	607.1		sensory box histidine kinase/response regulator	2.7.3.-	Regulatory functions	Protein interactions
DVU2694	1.7121	60.65		2.1114	133.93		1.3146	154.7		3.127	325.69		3.3007	369.42		2.5563	404.34		hypothetical protein		Hypothetical proteins
DVU2246	9.8636	159.15		4.0001	150.15		2.8699	69.2		3.1262	2906	1	5.0995	3080	3.5	2.5892	2941.5	1.5	S1 RNA binding domain protein		Unknown function	General
DVU1365	2.0214	106.78		2.7499	102.58		3.5035	176.25		3.1256	2250		6.1487	3178.5		2.6842	1541.7		heme-binding protein, putative		Transport and binding proteins	Cations
DVU0256	9.0733	257.22		5.3811	317.88		3.7159	138.43		3.1255	1113.7		4.883	1025.8		1.5924	396.71		ATP-dependent RNA helicase, DEAD/DEAH box family		Transcription	Other
DVU0051	2.1371	127.82		2.6446	60		1.3544	143.55		3.1244	1337	1	4.3586	1570.3	2	2.3407	2301.8	1	conserved hypothetical protein TIGR00044		Hypothetical proteins	Conserved
DVU0921	2.1614	184.12		2.0201	203.92		1.6116	190.22		3.1243	1071.2		3.5181	1033.4		2.4159	711.44		5-nitroimidazole antibiotic resistance protein, putatives		Cellular processes	Toxin production and resistance
DVUA0047	2.2889	171.25		2.4027	298.7		1.7038	179.32		3.1242	386.42		3.8455	394.28		2.1607	346.91		hypothetical protein		Hypothetical proteins
DVUA0070	4.32	668		2.5103	310.8		2.6001	244.9		3.1223	8335.2	3	4.6011	6592.6	3	1.2573	2154.9	2	conserved domain protein		Hypothetical proteins	Domain
DVU2971	2.0241	150.93		2.061	156.4		1.4351	107.55		3.1219	2133.3		4.8407	1827.4		3.317	1562.7		glycosyl transferase, family 8		Cell envelope	Biosynthesis and degradation of surface polysaccharides and lipopolysaccharides
DVU2870	2.0308	155.8		2.1582	170.05		1.6502	223		3.1212	3101.8		3.8819	3745.2		2.2478	842.8		conserved hypothetical protein		Hypothetical proteins	Conserved
DVU1762	3.2635	500.15		3.0124	513.92		3.4648	691.5		3.1195	4835.4	2.5	3.7853	3446.8	1.5	3.717	2153.1	1.5	membrane protein, putative		Cell envelope	Other
DVU1513	1.8855	130.43		2.2341	126.13		1.083	83.225		3.1192	469.41		3.5561	520.73		2.5936	607.04		conserved hypothetical protein		Hypothetical proteins	Conserved
DVU2240	3.7859	276.43		2.6484	173.7	1.33333	4.2888	210.85		3.118	2054.8	2	3.7622	1931	3.5	2.0768	1195.7	2	hydantoinase/oxoprolinase family protein		Central intermediary metabolism	Other
DVU1335	3.6623	951.85		2.805	686.03		2.721	508.07		3.1163	5571.4	7.5	4.6915	5917	11	3.454	5558.6	9.5	ATP-dependent Clp protease, proteolytic subunit (clpP)s	3.4.21.92	Protein fate	Degradation of proteins, peptides, and glycopeptides
DVU2523	2.5209	322.45		2.5731	479.35		2.7258	436.2		3.115	3694.5	1	3.4287	2161.5	4	3.0672	2254.1	1	lipoprotein, putative		Cell envelope	Other
DVU2720	1.8465	88.225		2.3069	39.325		1.2571	121.12		3.1136	399.64		3.6656	454.15		2.5139	635.96		hypothetical protein		Hypothetical proteins
DVU3000	0.92105	20		2.634	24.55		1.6384	20.6		3.1133	760.3		3.5626	840.25		3.294	301.27		hypothetical protein		Hypothetical proteins
DVU0106	2.358	277.82		2.3886	208.2		2.3755	253.7		3.113	7051.6	1	5.1327	5956.3	3	2.0584	2797.1	1	glutamine ABC transporter, permease protein (glnP)		Transport and binding proteins	Amino acids, peptides and amines
DVU3251	2.2149	147		1.905	76.7		1.4789	82.9		3.111	316.55		3.311	278.51		3.7208	230.06		membrane protein, HPP family		Cell envelope	Other
DVU1985	3.7802	608.45					2.6918	328.53	1	3.1085	570.86	22.5	4.1813	842.17	44.5	2.1419	763.19	14.5	conserved domain protein		Hypothetical proteins	Domain
DVU3151	2.5254	152.05		2.789	151.1		1.8145	113.45		3.1084	3924.7		5.8187	3697		2.1416	3251.4		MiaB-like tRNA modifying enzyme YliG, TIGR01125		Protein synthesis	tRNA and rRNA base modification
DVU2619	2.423	235.75		2.3405	407.5		1.7667	204.62		3.1076	2837.2		3.5166	1740.6		2.7391	743.22		conserved hypothetical protein		Hypothetical proteins	Conserved
DVU3201	3.8112	483.53		2.4872	452.8		2.5376	386.72		3.1064	3831.6		4.2459	3233.6		2.8667	2227.7		hypothetical protein		Hypothetical proteins
DVU3219	3.3612	234.55		2.5762	210.8		2.1836	348.35		3.1062	1667.1		4.4145	1892.6		1.9881	1666.2		hypothetical protein		Hypothetical proteins
DVU1256	2.0562	109		2.0833	88.95		2.8659	126.22		3.1056	1461.8		3.6207	1482.9		1.9118	1151.1		heptosyltransferase family protein		Cell envelope	Biosynthesis and degradation of surface polysaccharides and lipopolysaccharides
DVU2090	3.4482	216.63		2.923	196.35		4.0273	225.63		3.1023	1071.4	1.5	3.0549	1177.6	2	1.0945	883.66	1	EF hand domain protein		Unknown function	General
DVUA0122	3.1109	312.47		2.1733	245		2.6239	382.13		3.1023	1400.1		4.1556	1392.5		2.7871	265.06		type III secretion system protein, YscR family		Cellular processes	Pathogenesis
DVU2781	2.5255	274.83		1.9846	302.38		2.1038	412.72		3.1013	637.05		4.1133	676.35		2.7092	526.63		hypothetical protein		Hypothetical proteins
DVU0235	2.4582	244.47		2.1412	287.85		2.1569	161.05		3.1012	1439.6		4.2344	1672.2		3.1081	1957		hypothetical protein		Hypothetical proteins
DVU2388	1.5785	68.05		2.7178	157.18		3.2081	144.6		3.1009	1230.7		4.302	1061.1		2.6954	549.05		tolQ protein (tolQ-1)		Transport and binding proteins	Other
DVU0035	2.0888	292.78		1.8856	362.47		1.6044	259.6		3.1004	7749.2		4.9582	10814		8.1283	12803		hypothetical protein		Hypothetical proteins
DVU2725	2.4221	242.67		1.9287	154.6		2.1712	285.33		3.0993	2474.7		5.1992	4925.8		13.968	8894.7		membrane protein, putative		Cell envelope	Other
DVU0706	2.397	203.58		2.0964	272.2		1.6716	213.5		3.0954	788.11		3.9224	618.07		2.3891	509.52		membrane protein, putative		Cell envelope	Other
DVU1550	2.614	232.55		2.1906	152.3		3.4135	228.67		3.0948	1262.7		3.9807	987.77		2.4005	520.21		phosphoglycerate mutase family protein		Unknown function	Enzymes of unknown specificity
DVU1614	2.2004	167.68		1.9419	179.35		1.3408	106.2		3.0913	3869.9	1	4.3744	3892.9	1	3.5517	3364.4	1	iron-sulfur cluster-binding protein		Energy metabolism	Electron transport
DVU1218	2.0302	192.03		1.9684	232.5		1.6524	125.68		3.0904	2797.5		3.6962	1867		2.8839	941.01		conserved hypothetical protein		Hypothetical proteins	Conserved
DVU2733	1.6696	61.75		2.0771	92.9		1.6279	91.85		3.0903	831.68		3.6287	723.9		2.3842	655.24		adenine specific DNA methyltransferase, putative		DNA metabolism	Restriction/modification
DVU1251	1.8236	150.1	3.33333				1.3721	139.65	1.33333	3.09	3024.1	4	3.4697	1433.2	4	2.4165	1112.7	5	hypothetical protein		Hypothetical proteins
DVU1237	2.045	279.38		2.4516	218.27		2.5813	223.5		3.0892	2595.5		5.402	1468.4		3.1351	712.54		amino acid ABC transporter, permease protein, His/Glu/Gln/Arg/opinesfamily		Transport and binding proteins	Amino acids, peptides and amines
DVU0788	1.4237	24.225		1.9477	27.525		1.1774	25.7		3.0883	3051.3		4.5513	2348.6		2.9056	1513.6		rod shape-determining protein MreC (mreC)		Cell envelope	Biosynthesis of murein sacculus and peptidoglycan
DVU0110	2.3256	156.62		3.4553	190.45		3.9305	183.43		3.0864	2679.1	2	6.1865	2640.1	2	2.2946	1450	1	sigma-54 dependent transcriptional regulator/response regulators		Regulatory functions	DNA interactions
DVU0507	2.3068	294.05		2.0336	282.77		1.7726	292.72		3.0851	2528		4.0551	2685.5		8.4613	7625.7		conserved hypothetical protein		Hypothetical proteins	Conserved
DVU2848	2.8112	381.1		2.7547	401.25		2.483	481.2		3.0823	1109.3		3.9983	1106.3		1.9061	784.77		tail fiber assembly protein, putative		Other categories	Prophage functions
DVU0092	0.77352	128.92		3.118	155.8		3.7986	77		3.0817	1712		4.3843	1941.3		1.1558	1232.6		sensory box histidine kinase		Signal transduction	Two-component systems
DVU1331	3.988	628.38		2.6384	338.2	1.66667	10.005	1074.4		3.0805	2425.7		7.5366	6812.5		8.3339	11619		transcriptional regulator, LysR family		Regulatory functions	DNA interactions
DVU2468	2.4928	169.9		2.2276	222.07		1.4905	117.87		3.0801	4613.4		4.5467	3171.6		2.861	3750.8		tetraacyldisaccharide 4-kinase (lpxK)	2.7.1.130	Cell envelope	Biosynthesis and degradation of surface polysaccharides and lipopolysaccharides
DVU3344	2.4266	150.25		2.1977	184.95		2.8328	183		3.079	1589.9		4.8552	1046.5		2.9984	623.88		hypothetical protein		Hypothetical proteins
DVU0770	1.8287	107.43		2.0658	163.5		2.9749	281.6		3.0787	777.05		3.8893	737.76		2.6363	1176.3		membrane protein, putative		Cell envelope	Other
DVU0247	2.4187	435.95		2.735	450.35		1.7271	303.3		3.0781	4032.7		4.4635	3338.3		1.9957	1463.6		response regulator		Regulatory functions	Protein interactions
DVU0924	2.6323	205.02		2.1963	194.5		4.0401	227.45		3.0764	2307.8		4.3618	2393.6		1.3807	1700.9		23S rRNA (uracil-5-)-methyltransferase RumA (rumA)	2.1.1.-	Protein synthesis	tRNA and rRNA base modification
DVU2649	1.567	56.3		2.0923	83.7		1.0717	95.025		3.0752	480.51		3.7192	678.77		2.6832	969.21		hypothetical protein		Hypothetical proteins
DVU0690	1.9303	177.3		2.0084	225.25		2.653	240.57		3.0743	5030.9		3.6883	4342.4		2.5619	2474.3		conserved hypothetical protein		Hypothetical proteins	Conserved
DVU2241	4.3422	394.3		2.9024	351.38		3.2608	223		3.0726	4529.7	1.5	5.3182	6021.4	4.5	2.9524	3950.6	1.5	pyridoxal phosphate biosynthetic protein PdxA (pdxA)		Biosynthesis of cofactors, prosthetic groups, and carriers	Pyridoxine
DVU2662	2.0156	147.47		2.3187	167.23		2.0587	142.95		3.0701	3447.8		3.7023	2693.8		2.149	1826.3		conserved hypothetical protein		Hypothetical proteins	Conserved
[truncated: 1,565 more rows]
